# Supplementary material for: Experimental and computational tuning of metalla-N-heterocyclic carbenes at palladium(ii) and platinum(ii) centers
Source: Royal Society of Chemistry journal article supplement (doi:10.1039/d2dt00252c), 2022-01-01
Supplement: d2dt00252c1.pdf [file d2dt00252c1.pdf]

Electronic Supplementary Information

**Experimental and Computational Tuning of Metalla-  
*N*-heterocyclic Carbenes at Palladium(II) and  
Platinum(II) Centers**

Maria V. Kashina, Konstantin V. Luzyanin,\* Eugene A. Katlenok,  
Alexander S. Novikov, and Mikhail A. Kinzhalov \*

## Table of content

|                                                                                       |    |
|---------------------------------------------------------------------------------------|----|
| S1. X-ray diffraction studies.....                                                    | 3  |
| S2. UV-vis absorption spectra in KBr pellets.....                                     | 8  |
| S3. Theoretical studies of chloride complexes .....                                   | 10 |
| <i>S3.1. Geometry optimization of complexes 7, 8, 11 and 12</i> .....                 | 10 |
| <i>S3.2. TD-DFT calculations</i> .....                                                | 13 |
| <i>S3.3. FMO analysis</i> .....                                                       | 14 |
| <i>S3.4 Calculations of one-electron-oxidized forms</i> .....                         | 18 |
| <i>S3.5. QTAIM and MBO analysis</i> .....                                             | 18 |
| <i>S3.6. ETS-NOCV calculations</i> .....                                              | 19 |
| S4. Theoretical studies of thiocyanate complexes.....                                 | 20 |
| <i>S4.1. DFT studies of M–N coordination bonding in structures of 16 and 18</i> ..... | 20 |
| <i>S4.2. DFT studies of noncovalent interactions in structures of 16 and 18</i> ..... | 23 |
| S5. CCDC search.....                                                                  | 38 |
| S6. Hirshfeld analysis .....                                                          | 39 |
| S7. NMR spectra for complexes <b>9–18</b> .....                                       | 40 |
| S8. FTIR spectra for complexes <b>9–18</b> .....                                      | 48 |
| S9 References .....                                                                   | 53 |

## S1. X-ray diffraction studies

**Table S1.** Crystal data and structure refinement for **11**, **16**, **18**.

| Identification code                                      | <b>11</b>                                                                      | <b>16</b>                                                                     | <b>18</b>                                                                     |
|----------------------------------------------------------|--------------------------------------------------------------------------------|-------------------------------------------------------------------------------|-------------------------------------------------------------------------------|
| CCDC                                                     | 2133432                                                                        | 2133435                                                                       | 2133433                                                                       |
| Empirical formula                                        | C <sub>45</sub> H <sub>48</sub> Cl <sub>2</sub> N <sub>6</sub> Pt <sub>2</sub> | C <sub>46</sub> H <sub>47</sub> N <sub>9</sub> Pd <sub>2</sub> S <sub>2</sub> | C <sub>46</sub> H <sub>47</sub> N <sub>9</sub> Pt <sub>2</sub> S <sub>2</sub> |
| Formula weight                                           | 1133.97                                                                        | 1002.84                                                                       | 1180.22                                                                       |
| Temperature/K                                            | 293(2)                                                                         | 297.2(2)                                                                      | 99.98(10)                                                                     |
| Crystal system                                           | triclinic                                                                      | monoclinic                                                                    | monoclinic                                                                    |
| Space group                                              | P-1                                                                            | P2 <sub>1</sub> /c                                                            | P2 <sub>1</sub> /c                                                            |
| a/Å                                                      | 7.50970(10)                                                                    | 8.2035(2)                                                                     | 8.08540(10)                                                                   |
| b/Å                                                      | 8.75810(10)                                                                    | 30.9219(8)                                                                    | 30.3986(3)                                                                    |
| c/Å                                                      | 33.6683(2)                                                                     | 18.7259(5)                                                                    | 18.7295(2)                                                                    |
| α/°                                                      | 92.1540(10)                                                                    | 90                                                                            | 90                                                                            |
| β/°                                                      | 90.2040(10)                                                                    | 98.347(3)                                                                     | 97.8860(10)                                                                   |
| γ/°                                                      | 92.1370(10)                                                                    | 90                                                                            | 90                                                                            |
| Volume/Å <sup>3</sup>                                    | 2211.26(4)                                                                     | 98.347(3)                                                                     | 4559.89(9)                                                                    |
| Z                                                        | 2                                                                              | 4                                                                             | 4                                                                             |
| ρ <sub>calc</sub> /cm <sup>3</sup>                       | 1.703                                                                          | 1.417                                                                         | 1.719                                                                         |
| μ/mm <sup>-1</sup>                                       | 13.060                                                                         | 7.325                                                                         | 12.497                                                                        |
| F(000)                                                   | 1100.0                                                                         | 2040.0                                                                        | 2296.0                                                                        |
| Crystal size/mm <sup>3</sup>                             | 0.08 × 0.06 × 0.02                                                             | 0.1 × 0.06 × 0.04                                                             | 0.06 × 0.14 × 0.19                                                            |
| Radiation                                                | CuKα (λ = 1.54184)                                                             | CuKα (λ = 1.54184)                                                            | CuKα (λ = 1.54184)                                                            |
| 2θ range for data collection/°                           | 5.254 to 124.996                                                               | 5.56 to 134.996                                                               | 5.58 to 119.984                                                               |
| Index ranges                                             | -9 ≤ h ≤ 9, -19 ≤ k ≤ 19, -36 ≤ l ≤ 38                                         | -9 ≤ h ≤ 9, -34 ≤ k ≤ 37, -22 ≤ l ≤ 21                                        | -9 ≤ h ≤ 8, -34 ≤ k ≤ 34, -21 ≤ l ≤ 20                                        |
| Reflections collected                                    | 44150                                                                          | 40403                                                                         | 71892                                                                         |
| Independent reflections                                  | 7053 [R <sub>int</sub> = 0.0405, R <sub>sigma</sub> = 0.0241]                  | 8447 [R <sub>int</sub> = 0.0482, R <sub>sigma</sub> = 0.0370]                 | 8233 [R <sub>int</sub> = 0.0543, R <sub>sigma</sub> = 0.0230]                 |
| Data/restraints/parameters                               | 7053/0/508                                                                     | 8447/0/544                                                                    | 8233/0/544                                                                    |
| Goodness-of-fit on F <sup>2</sup>                        | 1.088                                                                          | 1.042                                                                         | 1.063                                                                         |
| Final R indexes [I ≥ 2σ (I)]                             | R <sub>1</sub> = 0.0344, wR <sub>2</sub> = 0.0805                              | R <sub>1</sub> = 0.0359, wR <sub>2</sub> = 0.0935                             | R <sub>1</sub> = 0.0212, wR <sub>2</sub> = 0.0493                             |
| Final R indexes [all data]                               | R <sub>1</sub> = 0.0362, wR <sub>2</sub> = 0.0815                              | R <sub>1</sub> = 0.0413, wR <sub>2</sub> = 0.0967                             | R <sub>1</sub> = 0.0218, wR <sub>2</sub> = 0.0498                             |
| Largest diff. peak/hole /e <sup>-</sup> ·Å <sup>-3</sup> | 3.69/-0.82                                                                     | 0.51/-0.75                                                                    | 0.77/-0.85                                                                    |

**Table S2.** Selected bonds and angles in crystal structure of **11**.

|         | Bond length, Å |             | Angle, °   |
|---------|----------------|-------------|------------|
| Pt1–C11 | 2.3498(17)     | N2–Pt1–C11  | 94.46(14)  |
| Pt1–N2  | 2.038(5)       | C1–Pt1–C11  | 172.41(17) |
| Pt1–C1  | 1.983(6)       | C1–Pt1–N2   | 78.8(2)    |
| Pt1–C8  | 1.924(6)       | C8–Pt1–C11  | 84.4 (2)   |
| Pt2–C12 | 2.3907(16)     | C8–Pt1–N2   | 175.8(3)   |
| Pt2–N1  | 2.054(4)       | C8–Pt1–C1   | 102.6(3)   |
| Pt2–C7  | 1.989(5)       | N1–Pt2–C12  | 101.57(14) |
| Pt2–C36 | 1.912(7)       | C7–Pt2–C12  | 177.86(18) |
| N2–C2   | 1.347(8)       | C7–Pt2–N1   | 79.3(2)    |
| N2–C6   | 1.350(8)       | C36–Pt2–C12 | 81.0(2)    |
| N1–C1   | 1.349(8)       | C36–Pt2–N1  | 177.2(2)   |
| N1–C2   | 1.398(7)       | C36–Pt2–C7  | 98.0(3)    |
| N3–C1   | 1.341(7)       | C2–N2–Pt1   | 113.4(4)   |
| N3–C7   | 1.449(8)       | C6–N2–Pt1   | 125.4(4)   |
| N3–C18  | 1.439(7)       | C1–N1–Pt2   | 115.7(4)   |
| N4–C7   | 1.264(8)       | C2–N1–Pt2   | 130.6(4)   |
| N4–C27  | 1.405(8)       | N1–C1–Pt1   | 116.5(4)   |
| N5–C8   | 1.136(8)       | N3–C1–Pt1   | 129.5(4)   |
| N5–C9   | 1.407(9)       | N3–C1–N1    | 113.9(5)   |
| N6–C36  | 1.145(8)       | N3–C7–Pt2   | 111.5(4)   |
| N6–C37  | 1.395(8)       | N4–C7–Pt2   | 134.7(5)   |
|         |                | N5–C8–Pt1   | 168.7(6)   |
|         |                | N6–C36–Pt2  | 170.0(6)   |
|         |                | C2–N2–C6    | 120.5(5)   |
|         |                | C1–N1–C2    | 113.7(5)   |
|         |                | C1–N3–C7    | 118.6(5)   |
|         |                | C1–N3–C18   | 123.5(5)   |
|         |                | C18–N3–C7   | 117.7(5)   |
|         |                | C7–N4–C27   | 123.9(5)   |
|         |                | N4–C7–N3    | 113.7(5)   |
|         |                | C8–N5–C9    | 179.3(7)   |
|         |                | C36–N6–C37  | 178.0(8)   |
|         |                | N1–C2–C3    | 124.2(6)   |
|         |                | N2–C2–N1    | 116.3(5)   |
|         |                | N2–C2–C3    | 119.4(5)   |

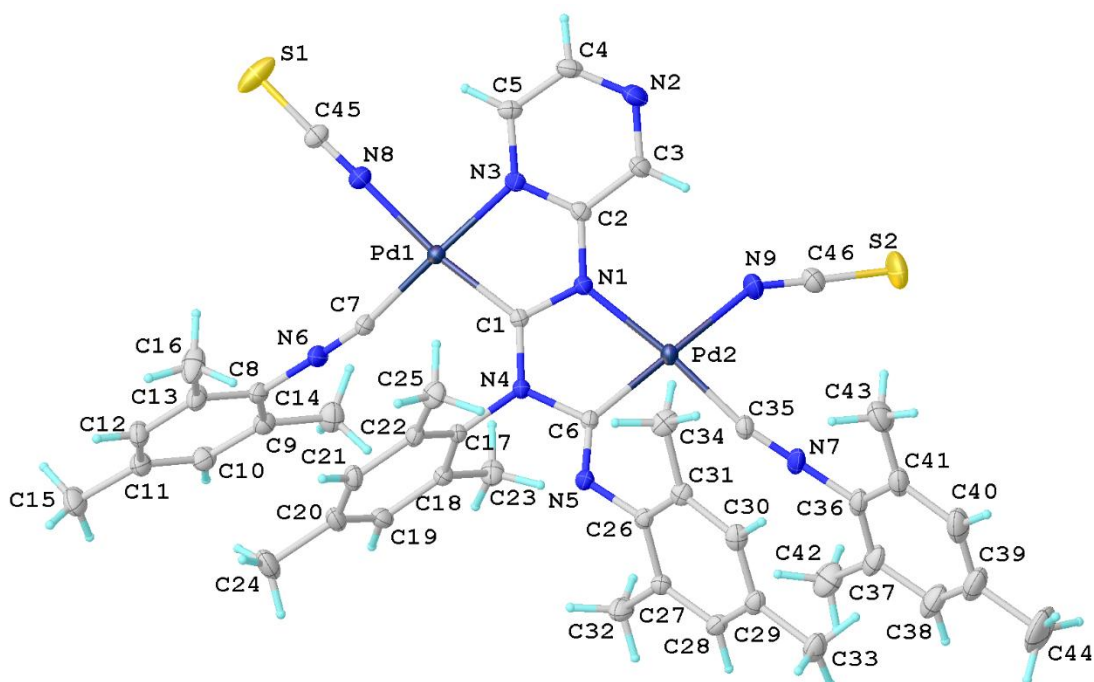

**Figure S1.** View of **16** with the atomic numbering schemes. Solvent molecule and hydrogen labels were omitted for simplicity.

**Table S3.** Selected bonds and angles in crystal structures of **16**, **18**.

|        | Bond length, Å |           | Angle, °   |            |            |
|--------|----------------|-----------|------------|------------|------------|
|        | <b>18</b>      | <b>16</b> | <b>18</b>  | <b>16</b>  |            |
| M1–C1  | 1.981(3)       | 1.986(3)  | N2–M1–N8   | 93.17(10)  | 93.57(11)  |
| M1–C7  | 1.936(3)       | 1.947(3)  | C7–M1–N8   | 87.29(11)  | 87.07(12)  |
| M1–N2  | 2.032(2)       | 2.018(2)  | C1–M1–N2   | 78.66(10)  | 78.85(10)  |
| M2–C6  | 1.982(3)       | 1.985(3)  | C7–M1–C1   | 100.92(12) | 100.65(12) |
| M2–C35 | 1.922(3)       | 1.951(3)  | N1–M2–N9   | 99.23(10)  | 100.43(12) |
| M1–N8  | 2.031(3)       | 2.039(3)  | C6–M2–N1   | 79.42(11)  | 79.58(10)  |
| M2–N9  | 2.096(3)       | 2.104(3)  | C35–M2–N9  | 84.67(12)  | 84.30(13)  |
| N6–C7  | 1.140(4)       | 1.149(4)  | C35–M2–C6  | 96.36(18)  | 95.62(12)  |
| N7–C35 | 1.148(4)       | 1.146(4)  | N6–C7–M1   | 168.9(3)   | 167.5(3)   |
| C1–N1  | 1.357(4)       | 1.343(4)  | C7–N6–C8   | 178.7(3)   | 178.0(4)   |
| C5–N2  | 1.346(4)       | 1.339(4)  | N7–C35–M2  | 173.1(3)   | 169.6(3)   |
| C6–N4  | 1.461(4)       | 1.456(4)  | C35–N7–C36 | 170.4(4)   | 172.5(4)   |
| C6–N5  | 1.260(4)       | 1.250(4)  | C46–N9–M2  | 147.1(3)   | 147.7(3)   |
| N8–C45 | 1.151(4)       | 1.135(5)  | C45–N8–M1  | 175.7(3)   | 178.5(3)   |
| N9–C46 | 1.158(5)       | 1.152(5)  |            |            |            |
| C45–S1 | 1.619(3)       | 1.608(4)  |            |            |            |
| C46–S2 | 1.612(4)       | 1.611(5)  |            |            |            |

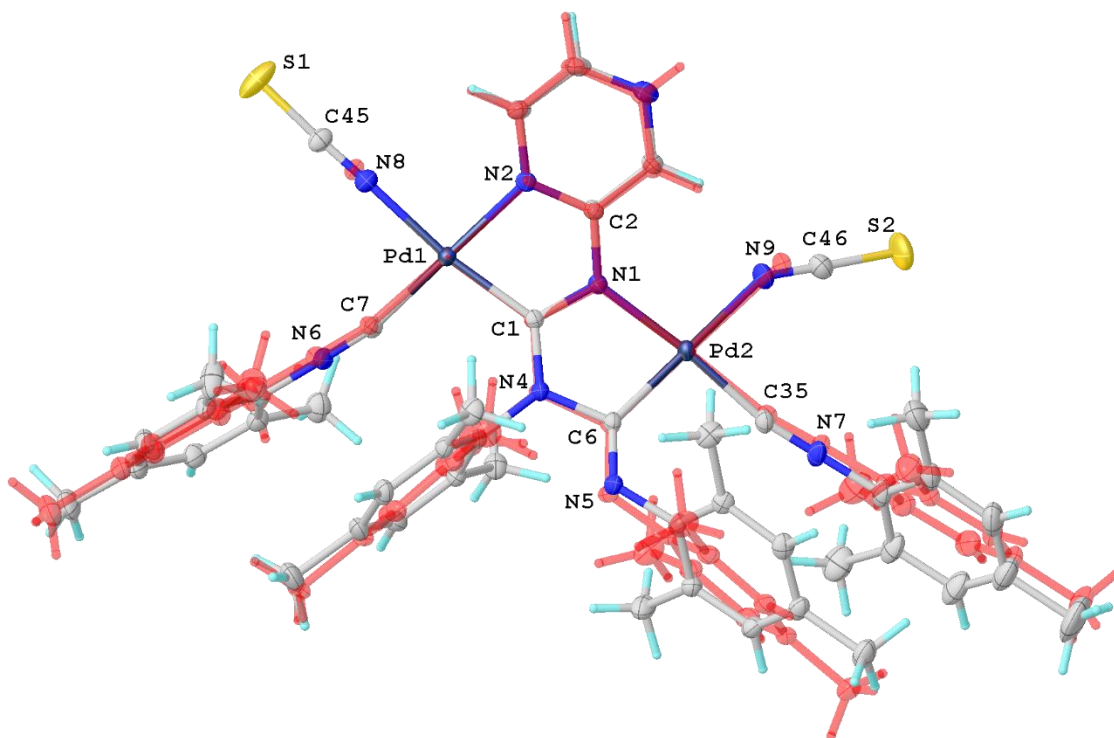

**Figure S2.** The view of overlaid **16** and **11** (red) structures with the selected atomic labels for **16**.

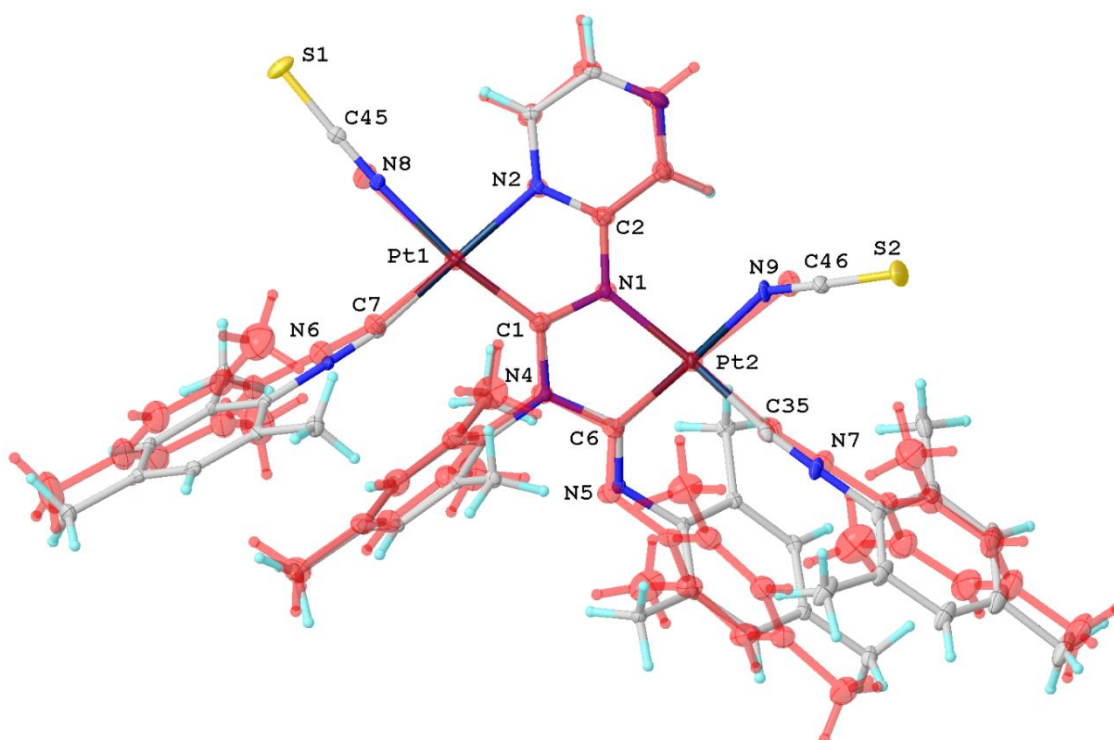

**Figure S3.** The view of overlaid **18** and **11** (red) structures with the selected atomic labels for **18**.

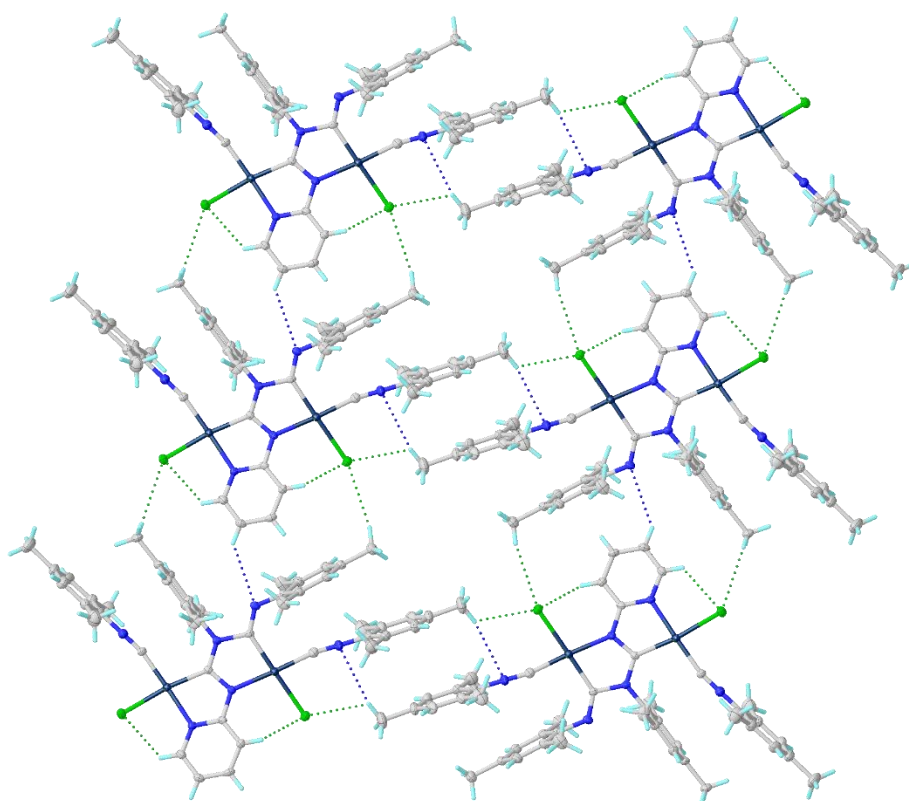

**Figure S4.** The crystal packing of complex **11**.

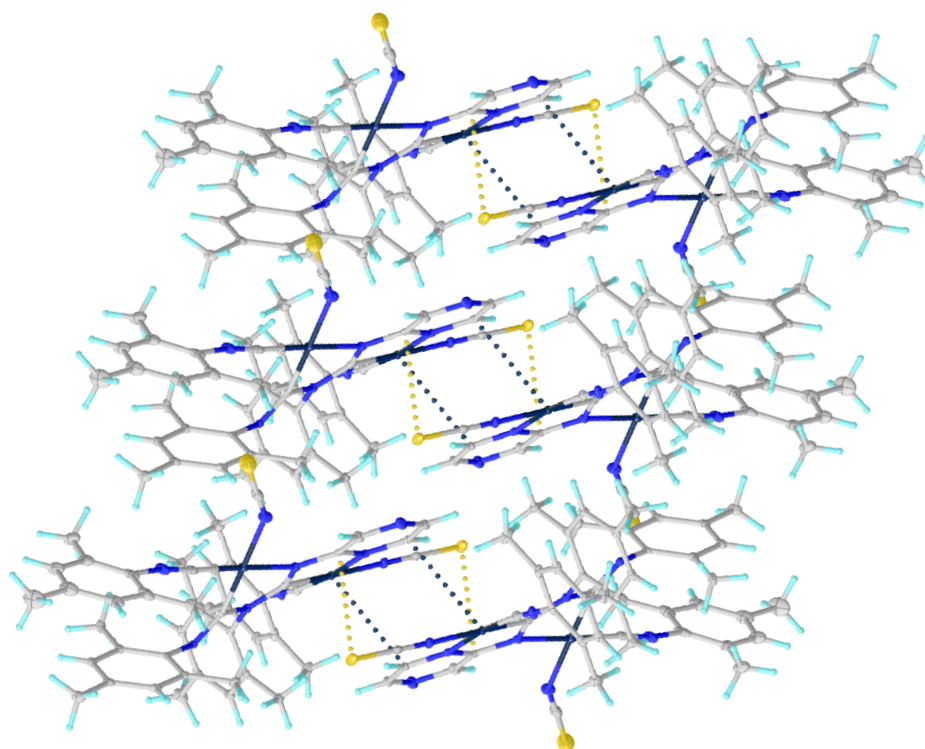

**Figure S5.** The crystal packing of complex **18**.

## S2. UV-vis absorption spectra in KBr pellets

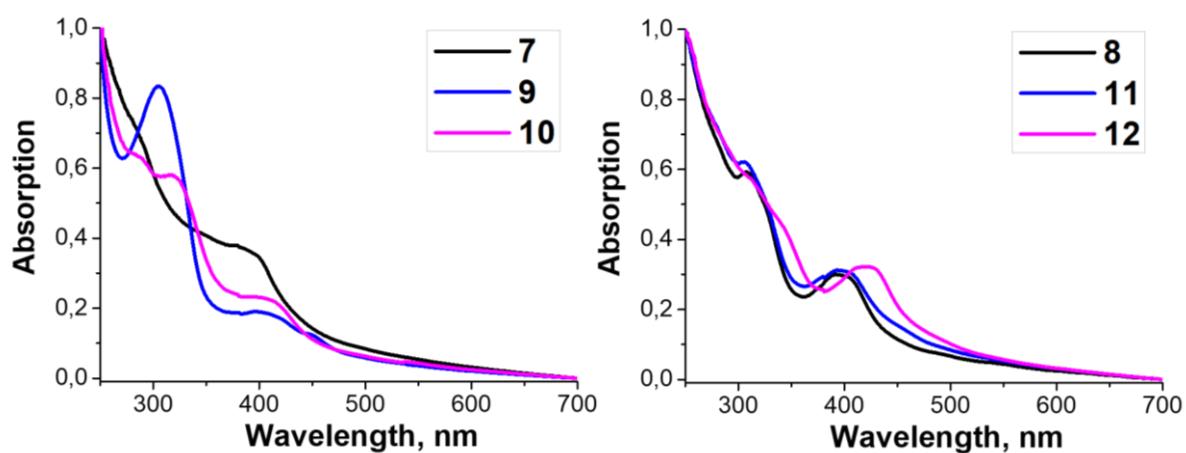

**Figure S6.** Normalized UV-Vis absorption spectra for **7–12** in solid state (KBr) at RT.

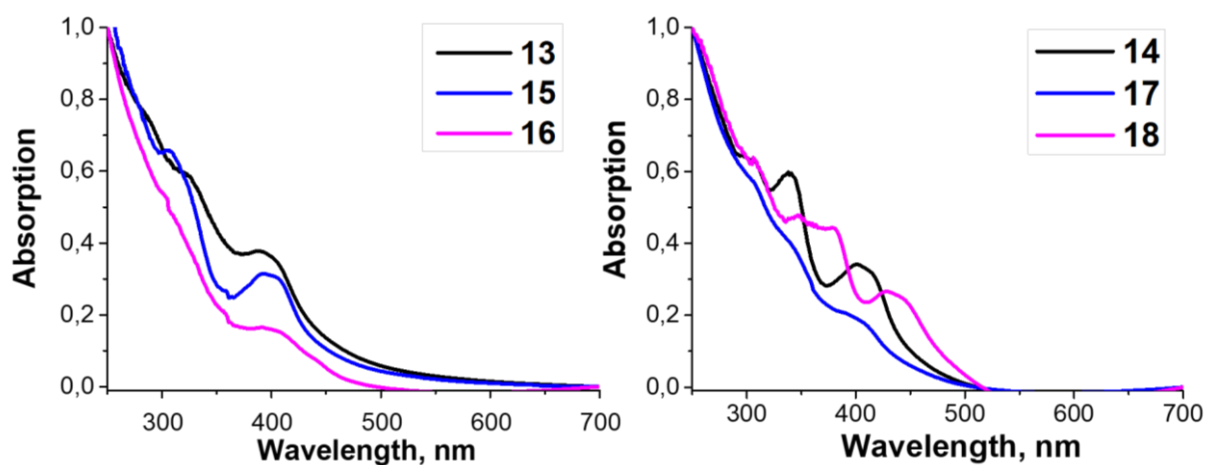

**Figure S7.** Normalized UV-Vis absorption spectra for **13–18** in solid state (KBr) at RT.



**Table S4.** UV-Vis absorption data for **7–18**.

| Complex   | Absorption: $\lambda_{\text{max}}$ , nm        |                   |
|-----------|------------------------------------------------|-------------------|
|           | in CH <sub>2</sub> Cl <sub>2</sub>             | in KBr (pellets)  |
| <b>7</b>  | 277sh (3.20), 348 (0.95), 382sh (0.78)         | 281sh, 391        |
| <b>8</b>  | 303 (2.36), 323sh (1.20) 387 (0.71) 404 (0.55) | 308, 401          |
| <b>9</b>  | 283sh (2.89), 378sh (0.60)                     | 304, 399          |
| <b>10</b> | 281 (3.59), 402 (1.13)                         | 289sh, 318, 410   |
| <b>11</b> | 303 (2.53), 321sh (1.62), 398 (0.66)           | 307, 401          |
| <b>12</b> | 311 (2.49), 338sh (1.15), 414 (1.06)           | 308sh, 339sh, 422 |
| <b>13</b> | 281sh, 314sh, 377                              | 285sh, 324, 389   |
| <b>14</b> | 304, 332, 395                                  | 304, 339, 403     |
| <b>15</b> | 272sh, 305, 380                                | 308, 394          |
| <b>16</b> | 280sh, 313sh, 481                              | 310sh, 400        |
| <b>17</b> | 264sh, 302, 403sh                              | 305sh, 338sh, 395 |
| <b>18</b> | 306sh, 351, 415                                | 307sh, 379, 431   |

## S3. Theoretical studies of chloride complexes

### S3.1. Geometry optimization of complexes 7, 8, 11 and 12

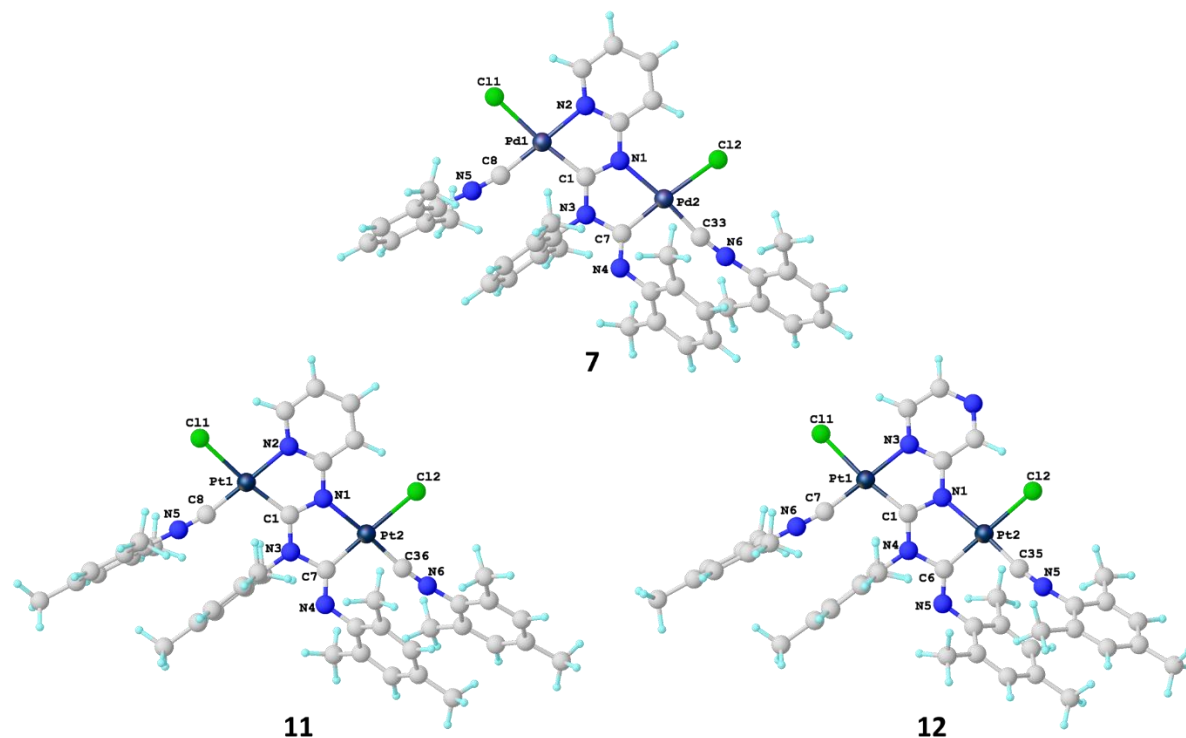

**Figure S8.** View of optimized structures of complexes **7**, **11** and **12** with the selected atomic numbering schemes. The atomic numbers in complex **8** is analogous to that in **7**.

**Table S5.** Selected experimental and optimized bond lengths and angles for complexes **7**, **8**, **11** and **12**

| Complex |          | Experimental values | Optimized values |
|---------|----------|---------------------|------------------|
| 7       | Bonds, Å |                     |                  |
|         | Pd1–Cl1  | 2.3469(5)           | 2.3430           |
|         | Pd2–Cl2  | 2.4082(6)           | 2.3980           |
|         | Pd1–N2   | 2.0281(17)          | 2.0327           |
|         | Pd2–N1   | 2.0536(17)          | 2.0836           |
|         | Pd1–C8   | 1.940(2)            | 1.9157           |
|         | Pd2–C33  | 1.945(2)            | 1.9169           |
|         | Pd1–C1   | 1.988(2)            | 1.9912           |
|         | Pd2–C7   | 1.977(2)            | 1.9785           |
|         | C8–N5    | 1.259(3)            | 1.1656           |
|         | C33–N6   | 1.153(3)            | 1.1671           |
|         | C1–N1    | 1.342(3)            | 1.3352           |
|         | C1–N3    | 1.343(3)            | 1.3446           |
| C7–N3   | 1.458(3) | 1.4341              |                  |
| C7–N4   | 1.259(3) | 1.2663              |                  |

|    |             |            |
|----|-------------|------------|
|    | Angles, °   |            |
|    | N2–Pd1–Cl1  | 100.54(8)  |
|    | C1–Pd1–N2   | 79.36(8)   |
|    | C8–Pd1–Cl1  | 86.26(6)   |
|    | C8–Pd1–C1   | 93.97(5)   |
|    | N1–Pd2–Cl2  | 96.08(9)   |
|    | C15–Pd2–N1  | 78.90(8)   |
|    | C33–Pd2–Cl2 | 83.44(7)   |
|    | C33–Pd2–C7  | 101.47(5)  |
|    | N5–C8–Pd1   | 169.25(18) |
|    | N6–C36–Pd2  | 171.1(2)   |
|    | C8–N5–C9    | 175.9(2)   |
|    | C33–N6–C34  | 172.0(2)   |
|    | N1–C1–N3    | 116.09(17) |
|    | N3–C7–N4    | 114.43(18) |
| 8  | Bonds, Å    |            |
|    | Pt1–Cl1     | 2.3549(14) |
|    | Pt2–Cl2     | 2.4083(13) |
|    | Pt1–N2      | 2.030(4)   |
|    | Pt2–N1      | 2.059(4)   |
|    | Pt1–C8      | 1.913(6)   |
|    | Pt2–C33     | 1.912(6)   |
|    | Pt1–C1      | 1.974(5)   |
|    | Pt2–C7      | 1.974(6)   |
|    | C8–N5       | 1.158(7)   |
|    | C33–N6      | 1.157(7)   |
|    | C1–N1       | 1.353(6)   |
|    | C1–N3       | 1.349(6)   |
|    | C7–N3       | 1.463(7)   |
|    | C7–N4       | 1.266(6)   |
|    | Angles, °   |            |
|    | N2–Pt1–Cl1  | 93.80(13)  |
|    | C1–Pt1–N2   | 79.0(2)    |
|    | C8–Pt1–Cl1  | 85.40(17)  |
|    | C8–Pt1–C1   | 101.8(2)   |
|    | N1–Pt2–Cl2  | 100.57(12) |
|    | C15–Pt2–N1  | 79.0(2)    |
|    | C33–Pt2–Cl2 | 83.28(17)  |
|    | C33–Pt2–C7  | 97.1(2)    |
|    | N5–C8–Pt1   | 170.5(5)   |
|    | N6–C33–Pt2  | 174.3(5)   |
|    | C8–N5–C9    | 172.2(6)   |
|    | C33–N6–C34  | 174.5(5)   |
|    | N1–C1–N3    | 113.3(5)   |
|    | N3–C7–N4    | 113.1(5)   |
| 11 | Bonds, Å    |            |
|    | Pt1–Cl1     | 2.3499(16) |
|    | Pt2–Cl2     | 2.3909(16) |
|    | Pt1–N2      | 2.037(4)   |
|    | Pt2–N1      | 2.055(4)   |
|    | Pt1–C8      | 1.925(6)   |
|    | Pt2–C36     | 1.911(7)   |
|    | Pt1–C1      | 1.984(6)   |

|        |          |        |
|--------|----------|--------|
| Pt2–C7 | 1.986(5) | 1.9716 |
| C8–N5  | 1.268(7) | 1.1676 |
| C36–N6 | 1.398(8) | 1.1696 |
| C1–N1  | 1.397(7) | 1.3508 |
| C1–N3  | 1.341(7) | 1.3414 |
| C7–N3  | 1.450(7) | 1.4397 |
| C7–N4  | 1.268(7) | 1.2704 |

---

Angles, °

|             |            |         |
|-------------|------------|---------|
| N2–Pt1–Cl1  | 94.51(14)  | 94.673  |
| C1–Pt1–N2   | 78.8(2)    | 78.382  |
| C8–Pt1–Cl1  | 84.36(19)  | 84.551  |
| C8–Pt1–C1   | 102.5(2)   | 102.474 |
| N1–Pt2–Cl2  | 101.57(13) | 102.212 |
| C15–Pt2–N1  | 79.4(2)    | 79.150  |
| C36–Pt2–Cl2 | 81.0(2)    | 81.399  |
| C36–Pt2–C7  | 98.0(3)    | 97.283  |
| N5–C8–Pt1   | 168.6(6)   | 170.144 |
| N6–C36–Pt2  | 170.0(6)   | 172.027 |
| C8–N5–C9    | 179.3(7)   | 173.593 |
| C36–N6–C37  | 178.2(8)   | 172.027 |
| N1–C1–N3    | 114.0(5)   | 114.510 |
| N3–C7–N4    | 113.5(5)   | 114.390 |

12

---

Bonds, Å

|         |        |
|---------|--------|
| Pt1–Cl1 | 2.3453 |
| Pt2–Cl2 | 2.3892 |
| Pt1–N3  | 2.0381 |
| Pt2–N1  | 2.0749 |
| Pt1–C7  | 1.8911 |
| Pt2–C35 | 1.8808 |
| Pt1–C1  | 1.9764 |
| Pt2–C6  | 1.9719 |
| C7–N6   | 1.1669 |
| C35–N7  | 1.1693 |
| C1–N1   | 1.3555 |
| C1–N4   | 1.3384 |
| C6–N4   | 1.4439 |
| C6–N5   | 1.2700 |

---

Angles, °

|             |         |
|-------------|---------|
| N3–Pt1–Cl1  | 94.030  |
| C1–Pt1–N3   | 78.431  |
| C7–Pt1–Cl1  | 85.348  |
| C7–Pt1–C1   | 102.253 |
| N1–Pt2–Cl2  | 101.147 |
| C6–Pt2–N1   | 79.130  |
| C35–Pt2–Cl2 | 82.345  |
| C35–Pt2–C6  | 97.371  |
| N5–C7–Pt1   | 170.482 |
| N6–C35–Pt2  | 172.145 |
| C7–N6–C8    | 175.085 |
| C35–N7–C36  | 170.245 |
| N1–C1–N4    | 114.329 |
| N4–C6–N5    | 114.241 |

---

### S3.2. TD-DFT calculations

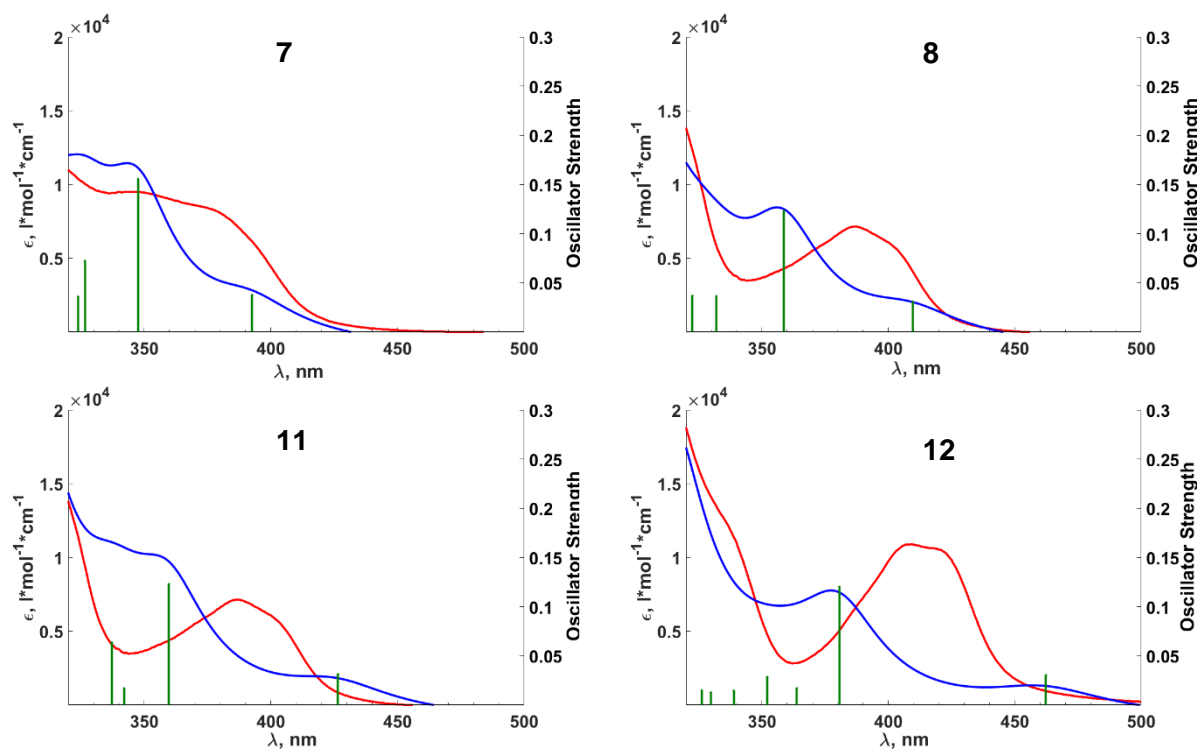

**Figure S9.** Experimental (red line) and the TD-DFT calculated absorption (blue line) spectra for **7**, **8**, **11** and **12**) in  $\text{CH}_2\text{Cl}_2$ : excitation energies and oscillator strengths are shown by the vertical green bars; the spectrum is convoluted with a Lorentzian function having a full width at half-maximum of  $0.35 \text{ cm}^{-1}$ . Absorption spectra were calculated from fully optimized geometry in PBE0-D3BJ def2-ZORA-TZVP(-f) in gas phase and using the CPCM model.

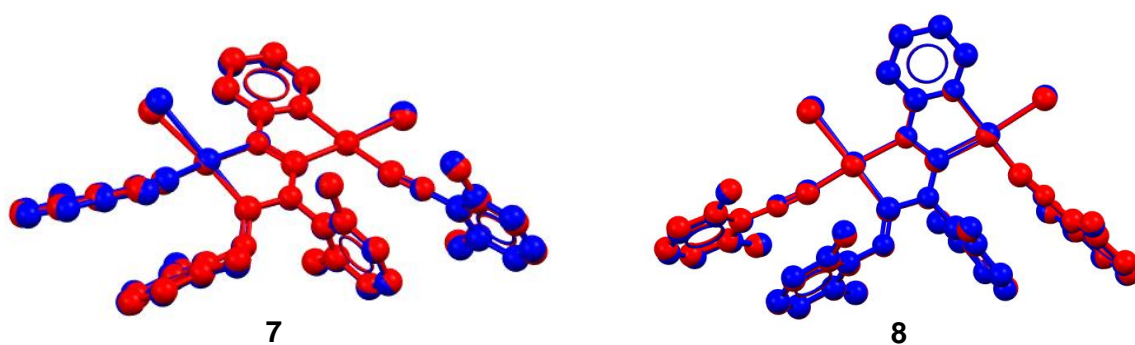

**Figure S10.** The overlaid geometries optimized in gas phase (red) and in solution ( $\text{CH}_2\text{Cl}_2$ , blue) of **7** and **8**.

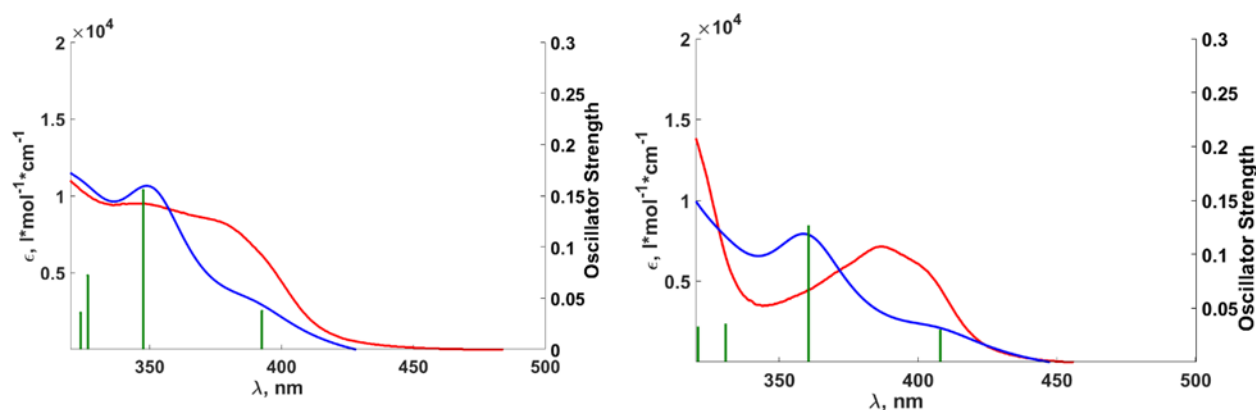

**Figure S11.** Experimental (red line) and the TD-DFT calculated absorption (blue line) spectra for **7** and **8** in  $\text{CH}_2\text{Cl}_2$ : excitation energies and oscillator strengths are shown by the vertical green bars; the spectrum is convoluted with a Lorentzian function having a full width at half-maximum of  $0.35 \text{ cm}^{-1}$ . Absorption spectra were calculated from fully optimized geometry in PBE0-D3BJ def2-ZORA-TZVP(-f) in solution and using the CPCM model.

**Table S6.** TD-DFT transition energies to the low-lying singlet states with significant oscillator strengths  $f$ , the main configurations and the characters of the complexes **7**, **8**, **11**, and **12**. Absorption spectra were calculated from fully optimized geometry in PBE0-D3BJ def2-ZORA-TZVP(-f) in gas and using the CPCM model.

| <b>7</b> |            |                |       | <b>8</b>                                                                                                                                             |            |                |       |                                                                                                                 |
|----------|------------|----------------|-------|------------------------------------------------------------------------------------------------------------------------------------------------------|------------|----------------|-------|-----------------------------------------------------------------------------------------------------------------|
| State    | Energy, eV | $\lambda$ , nm | $f$   | Transitions                                                                                                                                          | Energy, eV | $\lambda$ , nm | $f$   | Transitions                                                                                                     |
| S1       | 3.06       | 393            | 0.038 | H $\rightarrow$ L (91%)<br>H $\rightarrow$ L+5 (2%)                                                                                                  | 2.93       | 410            | 0.031 | H $\rightarrow$ L (92%)<br>H $\rightarrow$ L+1 (3%)                                                             |
| S2       | 3.45       | 348            | 0.156 | H-1 $\rightarrow$ L (91%)<br>H $\rightarrow$ L+5 (2%)                                                                                                | 3.35       | 359            | 0.123 | H-1 $\rightarrow$ L (94%)<br>H $\rightarrow$ L+1 (3%)                                                           |
| S3       | 3.67       | 327            | 0.072 | H-1 $\rightarrow$ L (3%)<br>H $\rightarrow$ L+1 (57%)<br>H $\rightarrow$ L+2 (7%)<br>H $\rightarrow$ L+3 (15%)<br>H $\rightarrow$ L+4 (8%)           | 3.61       | 332            | 0.036 | H-3 $\rightarrow$ L (2%)<br>H $\rightarrow$ L (4%)<br>H $\rightarrow$ L+1 (68%)<br>H $\rightarrow$ L+2 (21%)    |
| S4       | 3.70       | 324            | 0.036 | H $\rightarrow$ L (3%)<br>H $\rightarrow$ L+2 (46%)<br>H $\rightarrow$ L+3 (31%)<br>H $\rightarrow$ L+4 (9%)<br>H $\rightarrow$ L+4 (8%)             | 3.72       | 322            | 0.037 | H-3 $\rightarrow$ L (90%)<br>H $\rightarrow$ L (4%)<br>H $\rightarrow$ L+1 (68%)<br>H $\rightarrow$ L+2 (21%)   |
| S5       | 3.89       | 308            | 0.020 | H-3 $\rightarrow$ L (76%)<br>H-2 $\rightarrow$ L (8%)<br>H $\rightarrow$ L+3 (3%)<br>H $\rightarrow$ L+4 (9%)<br>H $\rightarrow$ L+4 (8%)            | 3.83       | 313            | 0.018 | H-7 $\rightarrow$ L (2%)<br>H-3 $\rightarrow$ L (2%)<br>H-2 $\rightarrow$ L (88%)<br>H-2 $\rightarrow$ L+1 (3%) |
| S6       | 3.92       | 306            | 0.035 | H-12 $\rightarrow$ L+1 (3%)<br>H-12 $\rightarrow$ L+2 (2%)<br>H-1 $\rightarrow$ L+1 (38%)<br>H-1 $\rightarrow$ L+2 (24%)<br>H $\rightarrow$ L+2 (2%) | 3.92       | 306            | 0.031 | H-7 $\rightarrow$ L (3%)<br>H-4 $\rightarrow$ L (6%)<br>H $\rightarrow$ L+1 (5%)<br>H $\rightarrow$ L+2 (35%)   |

| S7        | 3.96       | 303            | 0.016 | H → L+3 (3%)   | 3.93       | 306            | 0.021 | H → L+3 (26%)  |
|-----------|------------|----------------|-------|----------------|------------|----------------|-------|----------------|
|           |            |                |       | H → L+4 (7%)   |            |                |       | H → L+4 (18%)  |
|           |            |                |       | H-1 → L+1 (5%) |            |                |       | H-4 → L (87%)  |
|           |            |                |       | H-1 → L+2 (4%) |            |                |       | H → L+2 (3%)   |
|           |            |                |       | H → L+1 (30%)  |            |                |       | H → L+1 (5%)   |
|           |            |                |       | H → L+3 (34%)  |            |                |       | H → L+2 (35%)  |
|           |            |                |       | H → L+4 (11%)  |            |                |       | H → L+3 (26%)  |
|           |            |                |       | H → L+5 (3%)   |            |                |       | H → L+4 (18%)  |
|           |            |                |       | H → L+4 (7%)   |            |                |       |                |
| <b>11</b> |            |                |       | <b>12</b>      |            |                |       |                |
| State     | Energy, eV | $\lambda$ , nm | $f$   | Transitions    | Energy, eV | $\lambda$ , nm | $f$   | Transitions    |
| S1        | 2.81       | 427            | 0.031 | H → L (93%)    | 2.60       | 462            | 0.030 | H → L (95%)    |
| S2        | 3.33       | 360            | 0.123 | H → L+1 (3%)   | 3.15       | 381            | 0.120 | H → L+1 (3%);  |
|           |            |                |       | H-2 → L (20%)  |            |                |       | H-3 → L (33%)  |
| S3        | 3.51       | 342            | 0.017 | H-1 → L (75%); | 3.30       | 364            | 0.017 | H-1 → L (58%); |
|           |            |                |       | H-2 → L (13%)  |            |                |       | H-3 → L (51%)  |
| S4        | 3.56       | 337            | 0.064 | H-1 → L (7%)   | 3.41       | 352            | 0.028 | H-2 → L (5%)   |
|           |            |                |       | H → L (3%)     |            |                |       | H-1 → L (37%); |
|           |            |                |       | H → L+1 (64%)  |            |                |       | H → L (3%)     |
|           |            |                |       | H → L+2 (9%);  |            |                |       | H → L+1 (86%)  |
|           |            |                |       | H-2 → L (61%)  |            |                |       | H → L+3 (4%)   |
| S5        | 3.81       | 315            | 0.019 | H-1 → L (15%)  | 3.54       | 339            | 0.015 | H → L+4 (3%);  |
|           |            |                |       | H → L+1 (16%)  |            |                |       | H-7 → L (2%)   |
|           |            |                |       | H → L+2 (3%)   |            |                |       | H-3 → L (7%)   |
|           |            |                |       | H → L+2 (9%);  |            |                |       | H-2 → L (85%)  |
|           |            |                |       | H-3 → L (90%)  |            |                |       | H → L+4 (3%);  |
| S6        | 3.84       | 313            | 0.065 | H-3 → L+1 (3%) | 3.64       | 330            | 0.013 | H-7 → L (6%)   |
|           |            |                |       | H → L+1 (16%)  |            |                |       | H-5 → L (81%)  |
|           |            |                |       | H → L+2 (3%)   |            |                |       | H-4 → L (7%)   |
|           |            |                |       | H → L+2 (9%);  |            |                |       | H → L+4 (3%);  |
|           |            |                |       | H → L+2 (26%)  |            |                |       | H-7 → L (2%)   |
| S7        | 3.89       | 308            | 0.015 | H → L+3 (33%)  | 3.68       | 326            | 0.015 | H-7 → L (46%)  |
|           |            |                |       | H → L+4 (34%)  |            |                |       | H-6 → L (8%)   |
|           |            |                |       | H → L+2 (3%)   |            |                |       | H-5 → L (15%)  |
|           |            |                |       | H → L+2 (9%);  |            |                |       | H-4 → L (15%)  |
|           |            |                |       | H-5 → L (92%)  |            |                |       | H-2 → L (5%);  |

**Table S7.** TD-DFT transition energies to the low-lying singlet states with significant oscillator strengths  $f$ , the main configurations and the characters of the complexes **7** and **8**. Absorption spectra were calculated from fully optimized geometry in PBE0-D3BJ def2-ZORA-TZVP(-f) in solution and using the CPCM model.

| <b>7</b> |            |                |       |                                                     |
|----------|------------|----------------|-------|-----------------------------------------------------|
| State    | Energy, eV | $\lambda$ , nm | $f$   | Transitions                                         |
| S1       | 3.08       | 390            | 0.038 | H → L (91%);                                        |
| S2       | 3.42       | 351            | 0.162 | H-1 → L (92%);                                      |
| S3       | 3.68       | 326            | 0.056 | H-1 → L+1 (2%);<br>H → L+1 (54%);<br>H → L+2 (21%); |

|          |      |     |       |                                                                                                                      |
|----------|------|-----|-------|----------------------------------------------------------------------------------------------------------------------|
| S4       | 3.73 | 321 | 0.037 | H → L+3 (5%);<br>H → L+5 (8%);<br>H-1 → L+1 (2%);<br>H → L (3%);<br>H → L+2 (4%);<br>H → L+3 (73%);<br>H → L+5 (8%); |
| S5       | 3.87 | 310 | 0.048 | H-12 → L+1 (2%);<br>H-1 → L+1 (45%);<br>H-1 → L+2 (17%);<br>H-1 → L+3 (8%);<br>H → L+2 (3%);<br>H → L+5 (4%);        |
| S6       | 3.89 | 308 | 0.008 | H-8 → L (3%);<br>H-3 → L (71%);<br>H-2 → L (11%);<br>H-1 → L+3 (8%);<br>H → L+2 (3%);<br>H → L+5 (4%);               |
| S7       | 3.94 | 305 | 0.021 | H-3 → L (4%);<br>H → L+1 (35%);<br>H → L+2 (21%);<br>H → L+3 (13%);<br>H → L+5 (17%);<br>H → L+5 (4%);               |
| <b>8</b> |      |     |       |                                                                                                                      |
| S1       | 2.94 | 408 | 0.030 | H → L (92%);<br>H → L+1 (2%);                                                                                        |
| S2       | 3.33 | 360 | 0.127 | H-1 → L (95%);<br>H → L+1 (2%);                                                                                      |
| S3       | 3.63 | 331 | 0.036 | H → L (4%);<br>H → L+1 (48%);<br>H → L+2 (43%);                                                                      |
| S4       | 3.74 | 321 | 0.033 | H-3 → L (91%);<br>H-2 → L (2%);<br>H → L+2 (43%);                                                                    |
| S5       | 3.84 | 313 | 0.020 | H-7 → L (3%);<br>H-5 → L (4%);<br>H-3 → L (2%);<br>H-2 → L (83%);                                                    |
| S6       | 3.90 | 308 | 0.032 | H → L (2%);<br>H → L+1 (13%);<br>H → L+2 (26%);<br>H → L+3 (32%);<br>H → L+4 (18%);                                  |
| S7       | 3.93 | 305 | 0.036 | H-7 → L (7%);<br>H-5 → L (10%);<br>H-4 → L (72%);<br>H → L+3 (32%);<br>H → L+4 (18%);                                |



S3.3. FMO analysis

**Table S8.** MO contributions of atoms and ligands to FMOs for **7**, **8**, **11** and **12**.

| FMO       | M, % | Cl, % | CNR, % | Carbene moieties, % | Azaheterocycle fragments, % |
|-----------|------|-------|--------|---------------------|-----------------------------|
| <b>7</b>  |      |       |        |                     |                             |
| HOMO-1    | 7    | 2     | 3      | 33                  | 55                          |
| HOMO      | 5    | 2     | 10     | 81                  | 2                           |
| LUMO      | 12   | 2     | 11     | 34                  | 40                          |
| LUMO+1    | 24   | 3     | 55     | 14                  | 8                           |
| <b>8</b>  |      |       |        |                     |                             |
| HOMO-1    | 11   | 4     | 5      | 30                  | 50                          |
| HOMO      | 4    | 2     | 11     | 82                  | 1                           |
| LUMO      | 16   | 3     | 12     | 31                  | 38                          |
| LUMO+1    | 10   | 2     | 70     | 13                  | 5                           |
| <b>11</b> |      |       |        |                     |                             |
| HOMO-1    | 7    | 1     | 22     | 43                  | 27                          |
| HOMO      | 3    | 1     | 13     | 82                  | 1                           |
| LUMO      | 16   | 3     | 11     | 30                  | 40                          |
| LUMO+1    | 11   | 1     | 64     | 16                  | 7                           |
| <b>12</b> |      |       |        |                     |                             |
| HOMO-1    | 13   | 4     | 8      | 33                  | 42                          |
| HOMO      | 4    | 2     | 11     | 82                  | 1                           |
| LUMO      | 14   | 2     | 8      | 22                  | 54                          |
| LUMO+1    | 12   | 2     | 40     | 24                  | 22                          |

### S3.4 Calculations of one-electron-oxidized forms

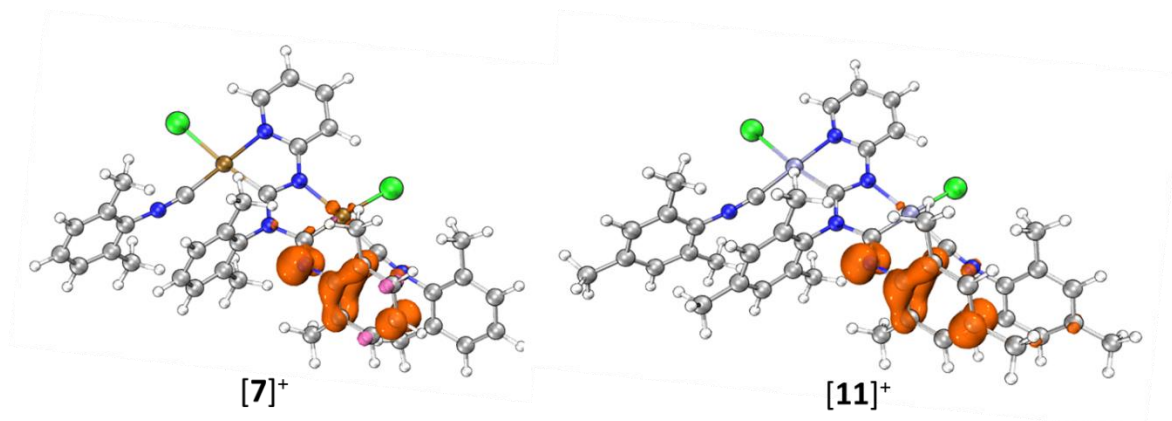

**Figure S12.** Plots of the spin density calculated for  $[7]^+$  and  $[11]^+$ .

### S3.5. QTAIM and MBO analysis

**Table S9.** Mayer bond orders and Topological Analysis of Bond Critical Points of complexes **7** and **8**, where  $G(\mathbf{r})$  – lagrangian kinetic energy,  $\nabla^2\rho(\mathbf{r})$  – laplacian of electron density, ELF – electron localization function, MBO – Mayer bond order.

| Bond    | Optimized bond lengths, Å | MBO    | $\rho_b$ | $G(\mathbf{r})$ | $V(\mathbf{r})$ | $H(\mathbf{r})$ | $\nabla^2\rho(\mathbf{r})$ | ELF   | $ V(\mathbf{r}) /G(\mathbf{r})$ |
|---------|---------------------------|--------|----------|-----------------|-----------------|-----------------|----------------------------|-------|---------------------------------|
| Pd1–C1  | 1.9912                    | 0.5512 | 0.139    | 0.120           | -0.175          | -0.056          | 0.255                      | 0.446 | 1.47                            |
| Pd2–C7  | 1.9785                    | 0.5491 | 0.144    | 0.115           | -0.176          | -0.061          | 0.213                      | 0.497 | 1.54                            |
| Pd1–C8  | 1.9157                    | 0.2675 | 0.148    | 0.162           | -0.224          | -0.061          | 0.403                      | 0.348 | 1.38                            |
| Pd2–C33 | 1.9169                    | 0.2753 | 0.147    | 0.162           | -0.223          | -0.061          | 0.406                      | 0.345 | 1.38                            |
| Pd1–N1  | 2.0327                    | 0.4195 | 0.112    | 0.136           | -0.162          | -0.026          | 0.439                      | 0.231 | 1.19                            |
| Pd2–N2  | 2.0836                    | 0.4360 | 0.098    | 0.117           | -0.137          | -0.020          | 0.390                      | 0.205 | 1.17                            |
|         |                           |        |          |                 |                 |                 |                            |       |                                 |
| Pd1–C11 | 2.3430                    | 0.5478 | 0.079    | 0.078           | -0.097          | -0.019          | 0.234                      | 0.228 | 1.25                            |
| Pd2–C12 | 2.3980                    | 0.6267 | 0.070    | 0.069           | -0.084          | -0.015          | 0.214                      | 0.198 | 1.22                            |
| N4–C7   | 1.2663                    | 1.6752 | 0.392    | 0.424           | -1.117          | -0.693          | -1.075                     | 0.668 | 2.63                            |
| N3–C7   | 1.4341                    | 0.9989 | 0.275    | 0.132           | -0.446          | -0.314          | -0.731                     | 0.865 | 3.39                            |
| N2–C1   | 1.3352                    | 1.2570 | 0.347    | 0.225           | -0.742          | -0.517          | -1.166                     | 0.827 | 3.30                            |
| N3–C1   | 1.3446                    | 1.2892 | 0.335    | 0.244           | -0.761          | -0.517          | -1.090                     | 0.783 | 3.12                            |
| N2–C2   | 1.3799                    | 1.0799 | 0.318    | 0.151           | -0.555          | -0.405          | -1.015                     | 0.889 | 3.68                            |
| Pt1–C1  | 1.9764                    | 0.9907 | 0.161    | 0.138           | -0.225          | -0.087          | 0.204                      | 0.496 | 1.63                            |
| Pt2–C7  | 1.9710                    | 1.0678 | 0.165    | 0.131           | -0.223          | -0.092          | 0.156                      | 0.541 | 1.70                            |
| Pt1–C8  | 1.8884                    | 0.9029 | 0.176    | 0.194           | -0.295          | -0.101          | 0.373                      | 0.402 | 1.52                            |
| Pt2–C33 | 1.8802                    | 0.9058 | 0.179    | 0.198           | -0.302          | -0.104          | 0.379                      | 0.405 | 1.52                            |
| Pt1–N1  | 2.0402                    | 0.9907 | 0.125    | 0.147           | -0.193          | -0.046          | 0.407                      | 0.269 | 1.31                            |
| Pt2–N2  | 2.0772                    | 0.6507 | 0.113    | 0.131           | -0.169          | -0.038          | 0.371                      | 0.250 | 1.29                            |
|         |                           |        |          |                 |                 |                 |                            |       |                                 |
| Pt1–C11 | 2.3487                    | 0.6945 | 0.091    | 0.083           | -0.116          | -0.033          | 0.202                      | 0.286 | 1.39                            |
| Pt2–C12 | 2.3989                    | 0.7788 | 0.081    | 0.074           | -0.101          | -0.027          | 0.189                      | 0.256 | 1.36                            |
| N4–C7   | 1.3396                    | 1.6346 | 0.390    | 0.402           | -1.087          | -0.685          | -1.135                     | 0.690 | 2.71                            |
| N3–C7   | 1.3674                    | 0.9715 | 0.272    | 0.129           | -0.437          | -0.308          | -0.714                     | 0.865 | 3.38                            |
| N2–C1   | 1.3689                    | 1.3101 | 0.337    | 0.198           | -0.673          | -0.475          | -1.111                     | 0.849 | 3.41                            |
| N3–C1   | 1.3683                    | 1.2935 | 0.337    | 0.244           | -0.765          | -0.521          | -1.109                     | 0.788 | 3.14                            |
| N2–C2   | 1.3775                    | 1.1067 | 0.320    | 0.155           | -0.566          | -0.411          | -1.022                     | 0.884 | 3.65                            |

S3.6. ETS-NOCV calculations

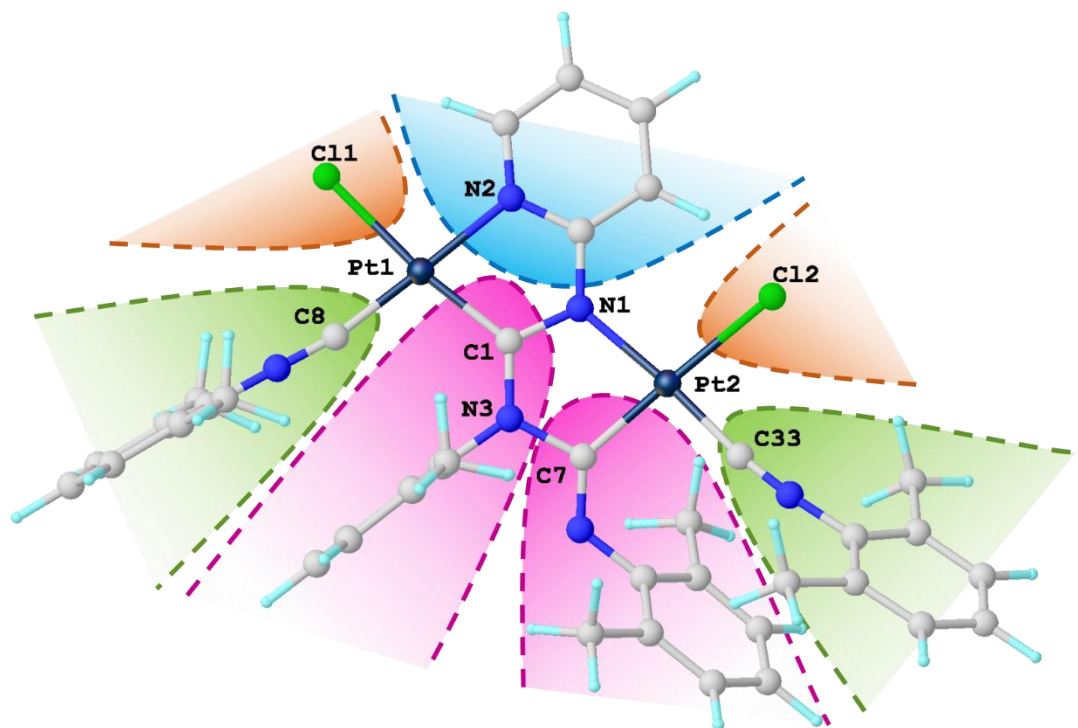

**Figure S13.** Fragmentation scheme of **8** used for ETS-NOCV analysis.

## S4. Theoretical studies of thiocyanate complexes

### S4.1. DFT studies of M–N coordination bonding in structures of **16** and **18**

To establish whether the coordination geometries of the studied compounds, and in particular the bent structure of the fragment M–N=C, are influenced by the crystal packing, quantum chemical calculations were undertaken. We carried out the full geometry optimization procedure for the isolated model species **16** and **18**. If these crystal-packing effects are significant, the structures should change appreciably on going from the solid state to the gas phase, otherwise the geometries are expected to be preserved in the isolated form. We found that both fragments M–N–C in the optimized equilibrium geometries of isolated model species **16** and **18** have a bent structure (**Figure S14**).

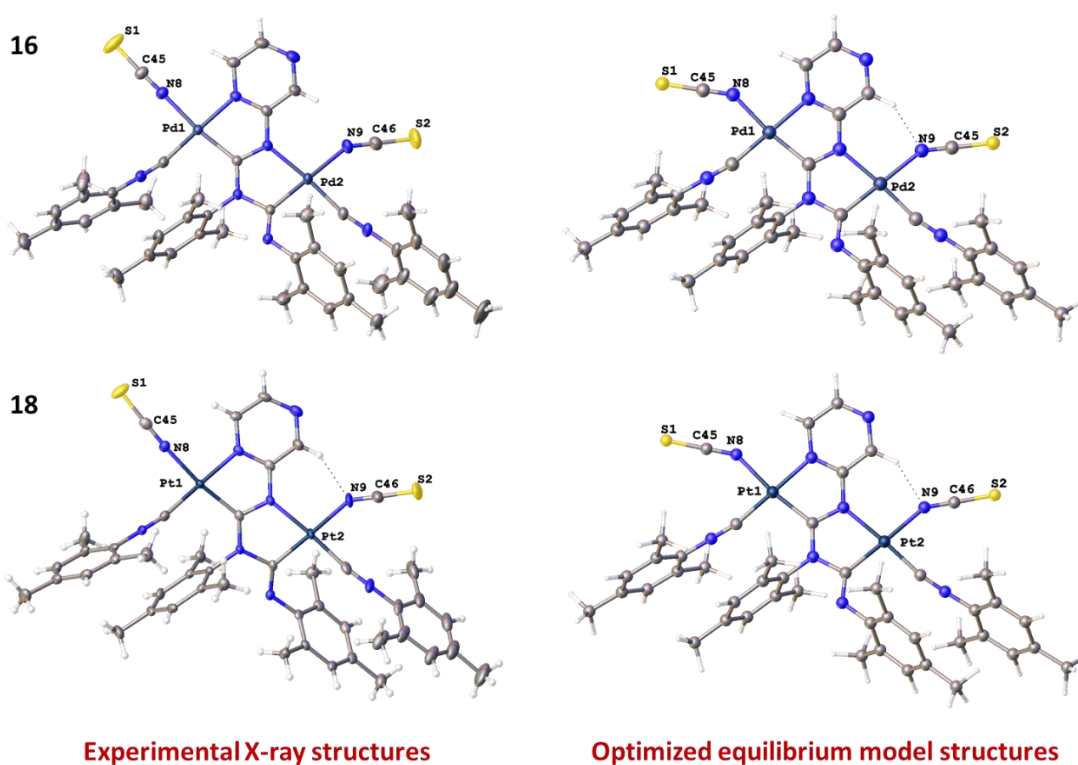

**Figure S14.** Views of experimentally determined and theoretically calculated structures of **16** and **18**.

Inspection of the data presented in **Table S10** reveals that the geometry optimization procedure affects only marginally the N8(9)–C45(46) and C45(46)–S1(2) bond lengths and the C46–N9–M2 angles, and significantly the M1–N8 bond lengths and the C45–N8–M1 angles.

**Table S10.** Selected bond lengths and angles for **16**, **18**.

|                 | <b>16</b>  |                                   | <b>18</b>  |                                   |
|-----------------|------------|-----------------------------------|------------|-----------------------------------|
|                 | X-ray data | theoretical geometry optimization | X-ray data | theoretical geometry optimization |
| Bond lengths, Å |            |                                   |            |                                   |
| M1–N8           | 2.031(3)   | 2.057                             | 2.028(4)   | 2.063                             |
| N8–C45          | 1.151(4)   | 1.189                             | 1.154(5)   | 1.189                             |
| C45–S1          | 1.619(3)   | 1.612                             | 1.620(4)   | 1.608                             |
| M2–N9           | 2.096(3)   | 2.094                             | 2.092(4)   | 2.094                             |
| N9–C46          | 1.158(5)   | 1.185                             | 1.161(6)   | 1.186                             |
| C46–S2          | 1.612(4)   | 1.618                             | 1.614(5)   | 1.615                             |
| Angles, °       |            |                                   |            |                                   |
| C45–N8–M1       | 175.7(3)   | 142.1                             | 175.6(3)   | 144.7                             |
| C46–N9–M2       | 147.1(3)   | 146.5                             | 147.0(4)   | 148.1                             |

To further rationalize the nature of coordination bonds M–N in **16** and **18**, the QTAIM analysis for the optimized equilibrium geometries of isolated model species was performed (**Table S11**). The values of electron density (0.085–0.106 a.u.), Laplacian of electron density (0.416–0.469 a.u.) and energy density ((–0.026)–(–0.011) a.u.) in the bond critical points (3, –1) corresponding to coordination bonds M–N in the optimized equilibrium geometries of isolated model species **16** and **18** are typical for such closed-shell interactions in similar coordination compounds.<sup>1</sup> The ellipticity of these coordination bonds M–N is low (0.094–0.125) confirming the formal “single” character of these bonds and is well consistent with small values of Wiberg bond indices<sup>2</sup> (0.52–0.42) and Fuzzy bond orders ca. 1<sup>3</sup> (1.03–1.10) for appropriate interatomic contacts.

**Table S11.** Results of the topological analysis of the electron density distribution and values of the Wiberg bond indices and Fuzzy bond orders corresponding to coordination bonds M–N in the optimized equilibrium geometries of isolated model species **16** and **18**.

|           | $\rho(\mathbf{r})$ , [e/E <sup>3</sup> ] | $\nabla^2\rho(\mathbf{r})$ , [e/E <sup>3</sup> ] | $H_b$ , [Hartree/E <sup>3</sup> ] | $\varepsilon$ | WI   | FBO  |
|-----------|------------------------------------------|--------------------------------------------------|-----------------------------------|---------------|------|------|
| <b>16</b> |                                          |                                                  |                                   |               |      |      |
| Pd1–N8    | 0.093                                    | 0.441                                            | -0.016                            | 0.125         | 0.47 | 1.10 |
| Pd2–N9    | 0.085                                    | 0.416                                            | -0.011                            | 0.115         | 0.42 | 1.06 |
| <b>18</b> |                                          |                                                  |                                   |               |      |      |
| Pt1–N8    | 0.106                                    | 0.469                                            | -0.026                            | 0.131         | 0.52 | 1.08 |
| Pt2–N9    | 0.097                                    | 0.445                                            | -0.021                            | 0.122         | 0.47 | 1.03 |

\*  $\rho(\mathbf{r})$  – density of all electrons,  $\nabla^2\rho(\mathbf{r})$  – Laplacian of electron density,  $H_b$  – energy density,  $\varepsilon$  – ellipticity of electron density, WI – Wiberg bond indices, FBO – Fuzzy bond orders. The Poincare-Hopf relationship (criterion that shows that all critical points were determined) was satisfied in all cases.

The natural bond orbitals (NBO) analysis<sup>4</sup> does not indicate the presence of any  $\sigma$ - or  $\pi$ -type Pd–N and Pt–N bond orbitals for the M–N coordination bonds in the optimized equilibrium model structures **16** and **18**, respectively. This observation may reveal that all Pd–N and Pt–N bond orbitals in the studied systems are totally polarized toward the N atom, and these coordination bonds are almost purely electrostatic. The results of charge decomposition analyses (CDA)<sup>5</sup> calculations reveal that the [M] $\leftarrow$ L  $\sigma$ -donation totally prevails over the [M] $\rightarrow$ L  $\pi$ -back-donation for M–N coordination bonds in the optimized equilibrium model structure **16** and **18** (Table S12).

**Table S12.** Results of the charge decomposition analysis (CDA) for M–N coordination bonds in the optimized equilibrium model structures **16** and **18**.

| Coordination bond | <i>d</i> | <i>b</i> | <i>r</i> | <i>N</i> | <i>E<sub>v</sub></i> |
|-------------------|----------|----------|----------|----------|----------------------|
| <b>16</b>         |          |          |          |          |                      |
| Pd1–N8 2.057 Å    | 0.244    | 0.006    | –0.219   | 0.423    | 136                  |
| Pd2–N9 2.094 Å    | 0.244    | 0.004    | –0.264   | 0.383    | 118                  |
| <b>18</b>         |          |          |          |          |                      |
| Pt1–N8 2.063 Å    | 0.245    | 0.005    | –0.257   | 0.421    | 144                  |
| Pt2–N9 2.094 Å    | 0.247    | 0.002    | –0.307   | 0.392    | 125                  |

\**d* – [M] $\leftarrow$ L  $\sigma$ -donation, *b* – [M] $\rightarrow$ L  $\pi$ -back-donation, *r* – repulsive part, *N* – net electron transfer between the donor and acceptor fragments, *E<sub>v</sub>*, kcal/mol – vertical total energies for M–N coordination bonds cleavage.

The overlap population between the occupied fragment orbitals (FOs) of the two fragments in corresponding complex orbital (term *r*) is negative in both cases. It implies that in this complex orbital, the electrons of occupied FOs are depleted (mainly due to the Pauli repulsion) from the overlap region between the two fragments. The negative values of *r* reveals that repulsive effect dominates the overall interaction between occupied FOs, which results in corresponding electrons moved away toward non-overlapping regions from overlap regions. The amount of net electron transfer between the donor and acceptor fragments was estimated using extended charge decomposition analysis (ECDA) formalism<sup>6</sup>: in both cases the net electron transfer between the donor and acceptor fragments is very similar and quite logical trend is observed – the shorter coordination bond led to higher net electron transfer between the donor and acceptor fragments (Table S12). The calculated vertical total energies for M–N coordination bonds cleavage in the optimized equilibrium model structure **16** and **18** are presented in Table S12: these contacts in platinum complex are expectedly stronger than those in palladium complex.

S4.2. DFT studies of noncovalent interactions in structures of **16** and **18**

**Table S13.** Characteristic parameters of noncovalent contacts in the **16** and **18** structures, where values of the density of all electrons –  $\rho(\mathbf{r})$ , Laplacian of electron density –  $\nabla^2\rho(\mathbf{r})$  and appropriate  $\lambda_2$  eigenvalues, energy density –  $H_b$ , potential energy density –  $V(\mathbf{r})$ , and Lagrangian kinetic energy –  $G(\mathbf{r})$  (a.u.) at the bond critical points (3, –1).

| Contact   | $d, \text{Å}$ | $d/\Sigma(R_{vdw})$<br>(Bondi) | $d/\Sigma(R_{vdw})$<br>(Alvarez) | $\rho(\mathbf{r})$ | $\nabla^2\rho(\mathbf{r})$ | $\lambda_2$ | $H_b$ | $V(\mathbf{r})$ | $G(\mathbf{r})$ |
|-----------|---------------|--------------------------------|----------------------------------|--------------------|----------------------------|-------------|-------|-----------------|-----------------|
| Pd1•••C5  | 3.471(13)     | 1.04                           | 0.89                             | 0.005              | 0.015                      | -0.005      | 0.001 | -0.002          | 0.003           |
| Pt1•••C5  | 3.479(3)      | 1.04                           | 0.86                             | 0.008              | 0.021                      | -0.008      | 0.001 | -0.004          | 0.005           |
| <b>16</b> |               |                                |                                  |                    |                            |             |       |                 |                 |
| N8•••C5   | 3.392(5)      | 1.04                           | 0.99                             | 0.005              | 0.016                      | -0.005      | 0.001 | -0.003          | 0.003           |
| S1•••C2   | 3.618(4)      | 1.03                           | 0.99                             | 0.006              | 0.017                      | -0.006      | 0.001 | -0.002          | 0.003           |
| <b>18</b> |               |                                |                                  |                    |                            |             |       |                 |                 |
| S1•••C2   | 3.570(3)      | 1.02                           | 0.98                             | 0.006              | 0.018                      | -0.006      | 0.001 | -0.003          | 0.004           |

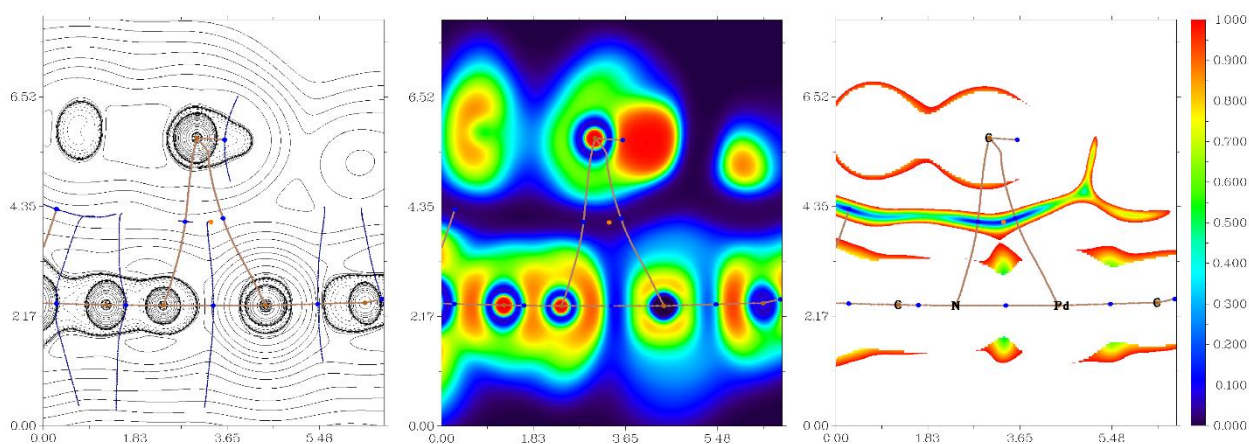

**Figure S15.** Contour line diagram of the Laplacian of electron density distribution  $\nabla^2\rho(\mathbf{r})$ , bond paths, and selected zero-flux surfaces (left panel), visualization of electron localization function (ELF, center panel) and reduced density gradient (RDG, right panel) analyses for Pd1•••C5 and N8•••C5 intermolecular contacts in **16**. Bond critical points (3, –1) are shown in blue, nuclear critical points (3, –3) – in pale brown, ring critical points (3, +1) – in orange, bond paths are shown as pale brown lines, length units –  $\text{Å}$ , and the color scale for the ELF and RDG maps are presented in a.u.

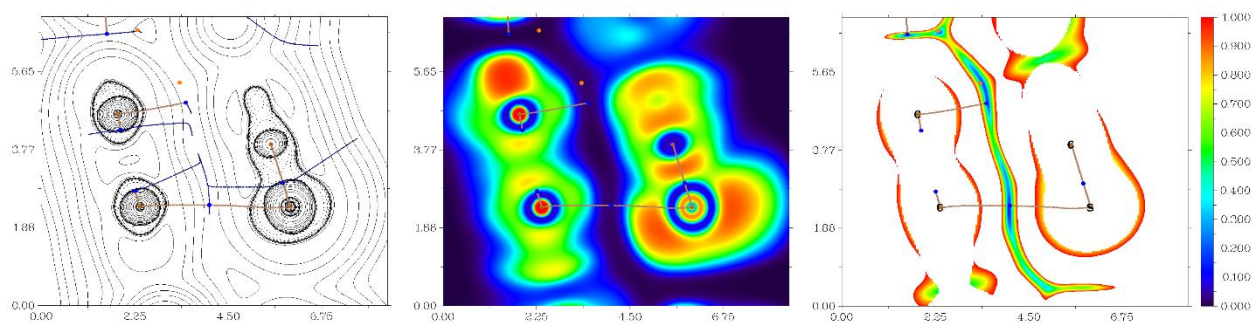

**Figure S16.** Contour line diagram of the Laplacian of electron density distribution  $\nabla^2\rho(\mathbf{r})$ , bond paths, and selected zero-flux surfaces (left panel), visualization of electron localization function (ELF, center panel) and reduced density gradient (RDG, right panel) analyses for S1•••C2 intermolecular contacts in **16**. Bond critical points (3, -1) are shown in blue, nuclear critical points (3, -3) – in pale brown, ring critical points (3, +1) – in orange, bond paths are shown as pale brown lines, length units – Å, and the color scale for the ELF and RDG maps are presented in a.u.

**Table S14.** Cartesian atomic coordinates for model structures.

| Atom                                                                                  | X         | Y         | Z         |
|---------------------------------------------------------------------------------------|-----------|-----------|-----------|
| <b>16</b> (dimeric supramolecular associate based on the experimental X-ray geometry) |           |           |           |
| Pd                                                                                    | 14.496848 | 16.185450 | 11.586381 |
| Pd                                                                                    | 17.053699 | 20.125209 | 12.290983 |
| S                                                                                     | 11.455291 | 13.181078 | 9.446265  |
| S                                                                                     | 16.506083 | 24.491072 | 10.680384 |
| N                                                                                     | 14.584641 | 17.428510 | 9.999497  |
| N                                                                                     | 16.624919 | 17.513855 | 13.286653 |
| N                                                                                     | 15.923431 | 18.624570 | 11.453353 |
| N                                                                                     | 18.539788 | 18.345963 | 14.208027 |
| N                                                                                     | 13.180987 | 14.917961 | 10.681866 |
| N                                                                                     | 18.756350 | 22.341382 | 13.598657 |
| C                                                                                     | 17.594232 | 18.590865 | 13.428759 |
| C                                                                                     | 15.808433 | 17.532408 | 12.225951 |
| C                                                                                     | 15.305356 | 18.542317 | 10.231277 |
| N                                                                                     | 13.843902 | 14.486601 | 14.069627 |
| N                                                                                     | 14.766583 | 19.390196 | 8.066149  |
| C                                                                                     | 17.423920 | 15.286550 | 13.924185 |
| C                                                                                     | 12.461033 | 14.189441 | 10.193295 |
| C                                                                                     | 19.618103 | 19.227237 | 14.451479 |
| C                                                                                     | 19.742553 | 19.759713 | 15.744701 |
| C                                                                                     | 16.672735 | 16.414581 | 14.218773 |
| N                                                                                     | 16.409470 | 21.769945 | 11.148760 |
| C                                                                                     | 15.984586 | 16.556822 | 15.431215 |
| C                                                                                     | 21.795033 | 20.869500 | 15.074004 |
| C                                                                                     | 14.227544 | 15.145856 | 13.210505 |
| C                                                                                     | 15.391938 | 19.509554 | 9.233013  |
| H                                                                                     | 15.907510 | 20.267790 | 9.388570  |



|   |           |           |           |
|---|-----------|-----------|-----------|
| C | 20.834404 | 20.576978 | 16.018909 |
| H | 20.919699 | 20.938950 | 16.871657 |
| C | 17.399948 | 14.240772 | 14.847968 |
| H | 17.866958 | 13.459252 | 14.656635 |
| C | 18.146502 | 21.447121 | 13.220695 |
| C | 13.373362 | 13.642124 | 15.090494 |
| C | 13.943287 | 17.311007 | 8.829854  |
| H | 13.426961 | 16.556575 | 8.659530  |
| C | 16.699044 | 14.332301 | 16.046700 |
| C | 20.567132 | 19.506153 | 13.468223 |
| C | 16.012435 | 15.499912 | 16.326095 |
| H | 15.558628 | 15.577556 | 17.134229 |
| C | 12.579013 | 14.178619 | 16.093019 |
| C | 15.200528 | 17.808231 | 15.720615 |
| H | 14.494882 | 17.900162 | 15.076042 |
| H | 14.823306 | 17.752974 | 16.601841 |
| H | 15.782289 | 18.569992 | 15.668887 |
| C | 21.648186 | 20.322182 | 13.810426 |
| H | 22.292810 | 20.504466 | 13.166372 |
| C | 19.652148 | 23.364278 | 13.979027 |
| C | 13.287208 | 11.482848 | 16.046700 |
| H | 13.526949 | 10.584350 | 16.045625 |
| C | 14.042363 | 18.286593 | 7.891805  |
| H | 13.582837 | 18.179387 | 7.090192  |
| C | 12.473203 | 11.950387 | 17.054598 |
| C | 12.139058 | 13.299200 | 17.067567 |
| H | 11.601954 | 13.622334 | 17.754754 |
| C | 13.762132 | 12.298258 | 15.035097 |
| C | 18.245214 | 15.193166 | 12.682099 |
| H | 18.893712 | 15.900938 | 12.673243 |
| H | 18.696007 | 14.345844 | 12.659662 |
| H | 17.674409 | 15.272388 | 11.914411 |
| C | 12.189914 | 15.626691 | 16.117105 |
| H | 11.930226 | 15.902577 | 15.234638 |
| H | 11.454771 | 15.750874 | 16.720750 |
| H | 12.937455 | 16.153755 | 16.409377 |
| C | 20.638503 | 23.694834 | 13.060061 |
| C | 18.695870 | 19.480488 | 16.784096 |
| H | 18.550597 | 18.533659 | 16.844570 |
| H | 18.992470 | 19.814228 | 17.633547 |
| H | 17.876552 | 19.915219 | 16.537142 |
| C | 16.456179 | 22.906016 | 10.964597 |
| C | 11.966324 | 10.996755 | 18.110668 |
| H | 12.632628 | 10.328069 | 18.285512 |
| H | 11.781507 | 11.482198 | 18.918876 |
| H | 11.161948 | 10.573836 | 17.801462 |
| C | 19.520343 | 23.928603 | 15.235194 |
| C | 20.444313 | 18.958526 | 12.068838 |
| H | 19.631016 | 19.277176 | 11.670644 |
| H | 21.193345 | 19.250305 | 11.544138 |

|    |           |           |           |
|----|-----------|-----------|-----------|
| H  | 20.430378 | 17.999020 | 12.100687 |
| C  | 20.705404 | 23.067428 | 11.692729 |
| H  | 19.911936 | 23.288551 | 11.200712 |
| H  | 21.475425 | 23.400179 | 11.226039 |
| H  | 20.772332 | 22.113951 | 11.781772 |
| C  | 16.670915 | 13.179223 | 17.032365 |
| H  | 17.028584 | 13.469827 | 17.875034 |
| H  | 15.766002 | 12.883548 | 17.154091 |
| H  | 17.201657 | 12.454847 | 16.692922 |
| C  | 14.644421 | 11.764855 | 13.936414 |
| H  | 15.447048 | 12.289414 | 13.888353 |
| H  | 14.870612 | 10.850711 | 14.123968 |
| H  | 14.178415 | 11.814361 | 13.099339 |
| C  | 22.982360 | 21.748609 | 15.396383 |
| H  | 23.762682 | 21.202312 | 15.512755 |
| H  | 23.127866 | 22.366923 | 14.677126 |
| H  | 22.808791 | 22.235103 | 16.206315 |
| C  | 18.420264 | 23.531257 | 16.191215 |
| H  | 18.297155 | 22.579944 | 16.158440 |
| H  | 18.661508 | 23.792701 | 17.082593 |
| H  | 17.604212 | 23.968863 | 15.938610 |
| C  | 21.481078 | 25.236909 | 14.720128 |
| C  | 21.562036 | 24.656814 | 13.480636 |
| H  | 22.247845 | 24.909167 | 12.906560 |
| C  | 20.468151 | 24.879761 | 15.585364 |
| H  | 20.419055 | 25.284992 | 16.421067 |
| C  | 22.545143 | 26.268154 | 15.116618 |
| H  | 22.155857 | 27.147171 | 15.113690 |
| H  | 22.875080 | 26.068337 | 15.994823 |
| H  | 23.269950 | 26.239366 | 14.487367 |
| Pd | 15.598753 | 14.736450 | 6.941157  |
| Pd | 13.041902 | 10.796691 | 6.236554  |
| S  | 18.640310 | 17.740822 | 9.081272  |
| S  | 13.589518 | 6.430828  | 7.847153  |
| N  | 15.510960 | 13.493390 | 8.528040  |
| N  | 13.470682 | 13.408045 | 5.240884  |
| N  | 14.172170 | 12.297330 | 7.074184  |
| N  | 11.555813 | 12.575937 | 4.319510  |
| N  | 16.914614 | 16.003939 | 7.845671  |
| N  | 11.339251 | 8.580518  | 4.928881  |
| C  | 12.501369 | 12.331035 | 5.098778  |
| C  | 14.287168 | 13.389492 | 6.301586  |
| C  | 14.790245 | 12.379583 | 8.296261  |
| N  | 16.251699 | 16.435299 | 4.457911  |
| N  | 15.329018 | 11.531704 | 10.461389 |
| C  | 12.671681 | 15.635350 | 4.603352  |
| C  | 17.634568 | 16.732459 | 8.334242  |
| C  | 10.477498 | 11.694663 | 4.076058  |
| C  | 10.353048 | 11.162187 | 2.782836  |
| C  | 13.422866 | 14.507319 | 4.308764  |

|   |           |           |           |
|---|-----------|-----------|-----------|
| N | 13.686131 | 9.151955  | 7.378777  |
| C | 14.111015 | 14.365078 | 3.096322  |
| C | 8.300568  | 10.052400 | 3.453533  |
| C | 15.868057 | 15.776044 | 5.317033  |
| C | 14.703663 | 11.412346 | 9.294524  |
| H | 14.188091 | 10.654110 | 9.138967  |
| C | 9.261197  | 10.344922 | 2.508629  |
| H | 9.175903  | 9.982950  | 1.655880  |
| C | 12.695653 | 16.681128 | 3.679569  |
| H | 12.228643 | 17.462648 | 3.870903  |
| C | 11.949099 | 9.474779  | 5.306843  |
| C | 16.722239 | 17.279776 | 3.437043  |
| C | 16.152314 | 13.610893 | 9.697684  |
| H | 16.668640 | 14.365325 | 9.868007  |
| C | 13.396557 | 16.589599 | 2.480837  |
| C | 9.528469  | 11.415747 | 5.059315  |
| C | 14.083166 | 15.421988 | 2.201442  |
| H | 14.536973 | 15.344344 | 1.393308  |
| C | 17.516588 | 16.743281 | 2.434518  |
| C | 14.895073 | 13.113669 | 2.806922  |
| H | 15.600719 | 13.021738 | 3.451495  |
| H | 15.272295 | 13.168926 | 1.925697  |
| H | 14.313312 | 12.351908 | 2.858651  |
| C | 8.447415  | 10.599718 | 4.717111  |
| H | 7.802791  | 10.417434 | 5.361165  |
| C | 10.443453 | 7.557622  | 4.548510  |
| C | 16.808393 | 19.439052 | 2.480837  |
| H | 16.568652 | 20.337550 | 2.481912  |
| C | 16.053238 | 12.635307 | 10.635733 |
| H | 16.512765 | 12.742513 | 11.437345 |
| C | 17.622398 | 18.971513 | 1.472939  |
| C | 17.956543 | 17.622700 | 1.459970  |
| H | 18.493647 | 17.299566 | 0.772784  |
| C | 16.333469 | 18.623642 | 3.492441  |
| C | 11.850387 | 15.728734 | 5.845438  |
| H | 11.201889 | 15.020962 | 5.854294  |
| H | 11.399594 | 16.576056 | 5.867875  |
| H | 12.421192 | 15.649512 | 6.613127  |
| C | 17.905687 | 15.295209 | 2.410433  |
| H | 18.165375 | 15.019323 | 3.292899  |
| H | 18.640830 | 15.171026 | 1.806787  |
| H | 17.158146 | 14.768145 | 2.118161  |
| C | 9.457098  | 7.227066  | 5.467476  |
| C | 11.399731 | 11.441412 | 1.743441  |
| H | 11.545004 | 12.388241 | 1.682967  |
| H | 11.103131 | 11.107672 | 0.893991  |
| H | 12.219049 | 11.006681 | 1.990395  |
| C | 13.639422 | 8.015884  | 7.562941  |
| C | 18.129277 | 19.925145 | 0.416870  |
| H | 17.462973 | 20.593831 | 0.242025  |

|                                                                                       |           |           |           |
|---------------------------------------------------------------------------------------|-----------|-----------|-----------|
| H                                                                                     | 18.314094 | 19.439702 | -0.391339 |
| H                                                                                     | 18.933653 | 20.348064 | 0.726076  |
| C                                                                                     | 10.575259 | 6.993297  | 3.292343  |
| C                                                                                     | 9.651288  | 11.963374 | 6.458699  |
| H                                                                                     | 10.464585 | 11.644724 | 6.856893  |
| H                                                                                     | 8.902256  | 11.671595 | 6.983399  |
| H                                                                                     | 9.665223  | 12.922880 | 6.426851  |
| C                                                                                     | 9.390197  | 7.854472  | 6.834809  |
| H                                                                                     | 10.183665 | 7.633349  | 7.326826  |
| H                                                                                     | 8.620176  | 7.521721  | 7.301499  |
| H                                                                                     | 9.323269  | 8.807949  | 6.745765  |
| C                                                                                     | 13.424686 | 17.742677 | 1.495172  |
| H                                                                                     | 13.067017 | 17.452073 | 0.652503  |
| H                                                                                     | 14.329599 | 18.038352 | 1.373446  |
| H                                                                                     | 12.893944 | 18.467053 | 1.834615  |
| C                                                                                     | 15.451180 | 19.157045 | 4.591124  |
| H                                                                                     | 14.648553 | 18.632486 | 4.639184  |
| H                                                                                     | 15.224989 | 20.071189 | 4.403569  |
| H                                                                                     | 15.917186 | 19.107539 | 5.428198  |
| C                                                                                     | 7.113241  | 9.173291  | 3.131154  |
| H                                                                                     | 6.332919  | 9.719588  | 3.014782  |
| H                                                                                     | 6.967735  | 8.554977  | 3.850411  |
| H                                                                                     | 7.286810  | 8.686797  | 2.321223  |
| C                                                                                     | 11.675337 | 7.390643  | 2.336322  |
| H                                                                                     | 11.798446 | 8.341956  | 2.369098  |
| H                                                                                     | 11.434094 | 7.129199  | 1.444944  |
| H                                                                                     | 12.491390 | 6.953037  | 2.588927  |
| C                                                                                     | 8.614523  | 5.684991  | 3.807409  |
| C                                                                                     | 8.533565  | 6.265086  | 5.046901  |
| H                                                                                     | 7.847756  | 6.012733  | 5.620977  |
| C                                                                                     | 9.627450  | 6.042139  | 2.942173  |
| H                                                                                     | 9.676546  | 5.636908  | 2.106470  |
| C                                                                                     | 7.550458  | 4.653746  | 3.410920  |
| H                                                                                     | 7.939744  | 3.774729  | 3.413847  |
| H                                                                                     | 7.220521  | 4.853563  | 2.532714  |
| H                                                                                     | 6.825651  | 4.682534  | 4.040170  |
| <b>18 (dimeric supramolecular associate based on the experimental X-ray geometry)</b> |           |           |           |
| Pt                                                                                    | -1.833565 | 15.875061 | 11.629371 |
| Pt                                                                                    | 0.717147  | 19.818671 | 12.312841 |
| S                                                                                     | -4.916942 | 13.047079 | 9.283423  |
| S                                                                                     | 0.057769  | 24.150168 | 10.667987 |
| N                                                                                     | -1.714410 | 17.109548 | 10.019025 |
| N                                                                                     | -0.384502 | 18.311813 | 11.473531 |
| N                                                                                     | 0.310963  | 17.196792 | 13.305578 |
| N                                                                                     | -3.168932 | 14.641790 | 10.730879 |
| N                                                                                     | -2.439213 | 14.175171 | 14.101846 |
| N                                                                                     | 2.220691  | 18.033665 | 14.228188 |
| N                                                                                     | 0.032794  | 21.418854 | 11.151833 |
| C                                                                                     | -0.517061 | 17.215031 | 12.261265 |
| C                                                                                     | 1.275620  | 18.287798 | 13.439341 |

|   |           |           |           |
|---|-----------|-----------|-----------|
| N | 2.361264  | 22.038377 | 13.645272 |
| N | -1.437202 | 19.003685 | 8.035219  |
| C | -0.978648 | 18.213017 | 10.240911 |
| C | -0.343461 | 16.269027 | 15.455984 |
| C | -2.084705 | 14.819925 | 13.235265 |
| C | -3.900837 | 13.970893 | 10.142584 |
| C | 3.401966  | 19.451152 | 15.775085 |
| C | -2.493602 | 12.019302 | 15.142449 |
| C | 4.121508  | 18.716722 | 12.098004 |
| H | 4.088601  | 17.757464 | 12.118022 |
| H | 4.884620  | 18.999399 | 11.587387 |
| H | 3.321354  | 19.055940 | 11.690371 |
| C | -0.305245 | 15.217235 | 16.365050 |
| H | -0.757225 | 15.302929 | 17.173915 |
| C | 0.359119  | 16.110042 | 14.253790 |
| C | 1.106498  | 14.975870 | 13.977360 |
| C | -1.132445 | 17.518105 | 15.717572 |
| H | -1.833713 | 17.596442 | 15.067275 |
| H | -0.553163 | 18.281171 | 15.658001 |
| H | -1.515645 | 17.475942 | 16.597604 |
| C | 4.233416  | 19.245658 | 13.502419 |
| C | 3.284342  | 18.936200 | 14.481984 |
| C | -0.847090 | 19.145038 | 9.209399  |
| H | -0.320964 | 19.897920 | 9.354683  |
| C | 1.098007  | 13.946878 | 14.914255 |
| H | 1.580988  | 13.171561 | 14.741068 |
| C | 0.385906  | 14.048105 | 16.103462 |
| C | -2.879714 | 13.355929 | 15.157291 |
| C | -2.187565 | 17.908119 | 7.866207  |
| H | -2.626601 | 17.792574 | 7.054058  |
| C | -4.138155 | 13.048599 | 17.138684 |
| H | -4.686334 | 13.382528 | 17.811060 |
| C | 5.303648  | 20.078275 | 13.860480 |
| H | 5.939909  | 20.290093 | 13.216879 |
| C | -2.338722 | 16.953907 | 8.829075  |
| H | -2.864887 | 16.204156 | 8.668022  |
| C | 4.479099  | 20.284074 | 16.077489 |
| H | 4.549296  | 20.639585 | 16.934701 |
| C | 5.448354  | 20.595659 | 15.133173 |
| C | -2.955633 | 11.208876 | 16.166540 |
| H | -2.701630 | 10.314519 | 16.189768 |
| C | 1.939429  | 14.873731 | 12.721364 |
| H | 1.389697  | 15.060865 | 11.957358 |
| H | 2.298933  | 13.986913 | 12.648379 |
| H | 2.657927  | 15.508636 | 12.762773 |
| C | -3.695855 | 13.909183 | 16.146132 |
| C | 1.771843  | 21.155602 | 13.207436 |
| C | -4.089871 | 15.359805 | 16.147988 |
| H | -3.341409 | 15.894364 | 16.423713 |
| H | -4.819868 | 15.492798 | 16.756172 |

|    |           |           |           |
|----|-----------|-----------|-----------|
| H  | -4.358646 | 15.618709 | 15.263169 |
| C  | -3.791141 | 11.704069 | 17.160947 |
| C  | 2.344260  | 19.150206 | 16.791755 |
| H  | 1.534546  | 19.608435 | 16.556233 |
| H  | 2.639359  | 19.444768 | 17.656333 |
| H  | 2.182145  | 18.204232 | 16.813962 |
| C  | -1.589162 | 11.465136 | 14.058990 |
| H  | -2.060997 | 11.454861 | 13.222705 |
| H  | -1.325674 | 10.570992 | 14.288390 |
| H  | -0.808880 | 12.018390 | 13.979196 |
| C  | 6.619541  | 21.483907 | 15.474536 |
| H  | 7.352032  | 20.943906 | 15.780335 |
| H  | 6.363820  | 22.097563 | 16.167746 |
| H  | 6.886871  | 21.975057 | 14.695003 |
| C  | 3.264065  | 23.034235 | 14.073832 |
| C  | -4.311600 | 10.769920 | 18.233275 |
| H  | -4.584772 | 11.281468 | 18.998189 |
| H  | -3.617728 | 10.157692 | 18.488722 |
| H  | -5.062398 | 10.278435 | 17.892115 |
| C  | 0.360850  | 12.914541 | 17.101580 |
| H  | 0.745024  | 13.209712 | 17.930036 |
| H  | 0.868924  | 12.175551 | 16.758379 |
| H  | -0.546240 | 12.638218 | 17.249127 |
| C  | 3.129349  | 23.563779 | 15.355801 |
| C  | 2.034030  | 23.164037 | 16.270433 |
| H  | 1.191565  | 23.437594 | 15.899404 |
| H  | 2.159821  | 23.585362 | 17.123453 |
| H  | 2.040613  | 22.210433 | 16.379818 |
| C  | 0.053897  | 22.563969 | 10.964454 |
| C  | 5.194087  | 24.330127 | 13.600746 |
| H  | 5.877296  | 24.600705 | 13.029853 |
| C  | 4.317274  | 22.791046 | 11.793745 |
| H  | 4.405236  | 21.837868 | 11.866359 |
| H  | 5.070673  | 23.146193 | 11.315836 |
| H  | 3.509640  | 23.002043 | 11.318470 |
| C  | 4.263939  | 23.390811 | 13.153634 |
| C  | 4.102375  | 24.502488 | 15.726849 |
| H  | 4.056245  | 24.887577 | 16.571408 |
| C  | 5.120820  | 24.872135 | 14.882716 |
| C  | 6.202315  | 25.841850 | 15.352091 |
| H  | 6.865227  | 25.363589 | 15.856159 |
| H  | 5.806849  | 26.518948 | 15.907345 |
| H  | 6.615448  | 26.254420 | 14.590608 |
| Pt | -0.736169 | 14.523539 | 6.923004  |
| Pt | -3.286882 | 10.579929 | 6.239535  |
| S  | 2.347207  | 17.351521 | 9.268952  |
| S  | -2.627503 | 6.248432  | 7.884389  |
| N  | -0.855325 | 13.289052 | 8.533351  |
| N  | -2.185232 | 12.086787 | 7.078844  |
| N  | -2.880697 | 13.201808 | 5.246797  |

|   |           |           |           |
|---|-----------|-----------|-----------|
| N | 0.599197  | 15.756810 | 7.821496  |
| N | -0.130521 | 16.223429 | 4.450529  |
| N | -4.790425 | 12.364935 | 4.324188  |
| N | -2.602529 | 8.979746  | 7.400543  |
| C | -2.052674 | 13.183569 | 6.291111  |
| C | -3.845354 | 12.110802 | 5.113035  |
| N | -4.930998 | 8.360223  | 4.907103  |
| N | -1.132532 | 11.394915 | 10.517156 |
| C | -1.591087 | 12.185583 | 8.311464  |
| C | -2.226273 | 14.129573 | 3.096391  |
| C | -0.485030 | 15.578675 | 5.317111  |
| C | 1.331102  | 16.427707 | 8.409792  |
| C | -5.971701 | 10.947448 | 2.777291  |
| C | -0.076133 | 18.379298 | 3.409927  |
| C | -6.691242 | 11.681878 | 6.454371  |
| H | -6.658335 | 12.641136 | 6.434353  |
| H | -7.454354 | 11.399201 | 6.964988  |
| H | -5.891089 | 11.342660 | 6.862004  |
| C | -2.264490 | 15.181365 | 2.187325  |
| H | -1.812509 | 15.095671 | 1.378460  |
| C | -2.928854 | 14.288558 | 4.298585  |
| C | -3.676233 | 15.422730 | 4.575016  |
| C | -1.437289 | 12.880495 | 2.834803  |
| H | -0.736021 | 12.802158 | 3.485101  |
| H | -2.016572 | 12.117429 | 2.894375  |
| H | -1.054090 | 12.922658 | 1.954771  |
| C | -6.803150 | 11.152942 | 5.049957  |
| C | -5.854077 | 11.462400 | 4.070391  |
| C | -1.722644 | 11.253562 | 9.342976  |
| H | -2.248771 | 10.500680 | 9.197693  |
| C | -3.667742 | 16.451722 | 3.638121  |
| H | -4.150722 | 17.227039 | 3.811307  |
| C | -2.955640 | 16.350495 | 2.448914  |
| C | 0.309980  | 17.042671 | 3.395085  |
| C | -0.382170 | 12.490481 | 10.686168 |
| H | 0.056867  | 12.606026 | 11.498317 |
| C | 1.568421  | 17.350001 | 1.413691  |
| H | 2.116599  | 17.016072 | 0.741316  |
| C | -7.873382 | 10.320325 | 4.691896  |
| H | -8.509644 | 10.108507 | 5.335496  |
| C | -0.231013 | 13.444693 | 9.723300  |
| H | 0.295153  | 14.194444 | 9.884353  |
| C | -7.048833 | 10.114526 | 2.474887  |
| H | -7.119030 | 9.759015  | 1.617674  |
| C | -8.018089 | 9.802941  | 3.419203  |
| C | 0.385899  | 19.189724 | 2.385835  |
| H | 0.131895  | 20.084081 | 2.362608  |
| C | -4.509164 | 15.524869 | 5.831012  |
| H | -3.959432 | 15.337735 | 6.595017  |
| H | -4.868667 | 16.411687 | 5.903997  |

|                                                   |           |           |           |
|---------------------------------------------------|-----------|-----------|-----------|
| H                                                 | -5.227662 | 14.889964 | 5.789603  |
| C                                                 | 1.126120  | 16.489417 | 2.406243  |
| C                                                 | -4.341578 | 9.242998  | 5.344939  |
| C                                                 | 1.520136  | 15.038795 | 2.404388  |
| H                                                 | 0.771675  | 14.504236 | 2.128662  |
| H                                                 | 2.250134  | 14.905802 | 1.796204  |
| H                                                 | 1.788911  | 14.779891 | 3.289206  |
| C                                                 | 1.221406  | 18.694531 | 1.391428  |
| C                                                 | -4.913995 | 11.248394 | 1.760620  |
| H                                                 | -4.104281 | 10.790165 | 1.996143  |
| H                                                 | -5.209094 | 10.953832 | 0.896043  |
| H                                                 | -4.751879 | 12.194368 | 1.738413  |
| C                                                 | -0.980573 | 18.933464 | 4.493385  |
| H                                                 | -0.508738 | 18.943739 | 5.329671  |
| H                                                 | -1.244061 | 19.827608 | 4.263985  |
| H                                                 | -1.760854 | 18.380210 | 4.573179  |
| C                                                 | -9.189275 | 8.914693  | 3.077839  |
| H                                                 | -9.921767 | 9.454694  | 2.772040  |
| H                                                 | -8.933555 | 8.301037  | 2.384630  |
| H                                                 | -9.456606 | 8.423543  | 3.857373  |
| C                                                 | -5.833800 | 7.364365  | 4.478543  |
| C                                                 | 1.741865  | 19.628680 | 0.319101  |
| H                                                 | 2.015038  | 19.117132 | -0.445814 |
| H                                                 | 1.047994  | 20.240908 | 0.063653  |
| H                                                 | 2.492664  | 20.120165 | 0.660260  |
| C                                                 | -2.930584 | 17.484059 | 1.450796  |
| H                                                 | -3.314759 | 17.188888 | 0.622339  |
| H                                                 | -3.438658 | 18.223049 | 1.793996  |
| H                                                 | -2.023494 | 17.760382 | 1.303249  |
| C                                                 | -5.699084 | 6.834821  | 3.196574  |
| C                                                 | -4.603765 | 7.234563  | 2.281942  |
| H                                                 | -3.761300 | 6.961006  | 2.652971  |
| H                                                 | -4.729556 | 6.813238  | 1.428923  |
| H                                                 | -4.610347 | 8.188167  | 2.172557  |
| C                                                 | -2.623632 | 7.834631  | 7.587922  |
| C                                                 | -7.763821 | 6.068473  | 4.951629  |
| H                                                 | -8.447030 | 5.797895  | 5.522523  |
| C                                                 | -6.887009 | 7.607554  | 6.758630  |
| H                                                 | -6.974970 | 8.560732  | 6.686016  |
| H                                                 | -7.640407 | 7.252407  | 7.236540  |
| H                                                 | -6.079374 | 7.396557  | 7.233905  |
| C                                                 | -6.833673 | 7.007789  | 5.398741  |
| C                                                 | -6.672109 | 5.896112  | 2.825527  |
| H                                                 | -6.625980 | 5.511023  | 1.980967  |
| C                                                 | -7.690554 | 5.526465  | 3.669660  |
| C                                                 | -8.772050 | 4.556750  | 3.200285  |
| H                                                 | -9.434961 | 5.035011  | 2.696217  |
| H                                                 | -8.376583 | 3.879652  | 2.645031  |
| H                                                 | -9.185182 | 4.144180  | 3.961767  |
| <b>16</b> (optimized equilibrium model structure) |           |           |           |



|    |           |           |           |
|----|-----------|-----------|-----------|
| Pd | -2.808334 | 1.979825  | 0.016994  |
| Pd | 1.928745  | 1.170837  | -0.158452 |
| S  | -7.343744 | 2.730750  | 0.320977  |
| S  | 5.668820  | 3.841493  | -1.130402 |
| N  | -1.640252 | 3.651266  | 0.109265  |
| N  | -0.596194 | -0.097435 | 0.211925  |
| N  | 0.047608  | 2.061101  | 0.002426  |
| N  | 1.061511  | -1.558610 | 0.791475  |
| N  | -4.572557 | 3.036981  | 0.060304  |
| N  | 4.705369  | -0.161994 | -0.524169 |
| C  | 0.817148  | -0.398025 | 0.353589  |
| C  | -0.964602 | 1.181671  | 0.065904  |
| C  | -0.321508 | 3.388958  | 0.047985  |
| N  | -4.777705 | -0.380943 | -0.358475 |
| N  | 0.168271  | 5.721958  | 0.156138  |
| C  | -2.089349 | -1.470501 | 1.577684  |
| C  | -5.747632 | 2.896365  | 0.170998  |
| C  | 2.358114  | -2.053311 | 0.992781  |
| C  | 2.854647  | -2.994544 | 0.080047  |
| C  | -1.531014 | -1.181908 | 0.333167  |
| N  | 3.094258  | 2.834888  | -0.664496 |
| C  | -1.811998 | -1.940895 | -0.806381 |
| C  | 4.930792  | -3.109529 | 1.348583  |
| C  | -3.933253 | 0.397914  | -0.196180 |
| C  | 0.583100  | 4.468467  | 0.074067  |
| H  | 1.648698  | 4.278951  | 0.013568  |
| C  | 4.137030  | -3.502035 | 0.272932  |
| H  | 4.532082  | -4.217117 | -0.446565 |
| C  | -2.981648 | -2.539669 | 1.657296  |
| H  | -3.434268 | -2.775962 | 2.617771  |
| C  | 3.614691  | 0.203571  | -0.361771 |
| C  | -5.778411 | -1.328646 | -0.508875 |
| C  | -2.068632 | 4.920480  | 0.187794  |
| H  | -3.142613 | 5.061550  | 0.228466  |
| C  | -3.304257 | -3.311197 | 0.543367  |
| C  | 3.113953  | -1.670820 | 2.113454  |
| C  | -2.702624 | -3.001630 | -0.678483 |
| H  | -2.946951 | -3.597135 | -1.555880 |
| C  | -5.952108 | -1.919991 | -1.764951 |
| C  | -1.204329 | -1.578283 | -2.134748 |
| H  | -1.575076 | -0.606393 | -2.484436 |
| H  | -1.446246 | -2.327564 | -2.893404 |
| H  | -0.114975 | -1.499686 | -2.067475 |
| C  | 4.391138  | -2.206873 | 2.264275  |
| H  | 4.988957  | -1.899709 | 3.120733  |
| C  | 6.026514  | -0.578272 | -0.580483 |
| C  | -7.534878 | -2.623926 | 0.438129  |
| H  | -8.154969 | -2.895864 | 1.288660  |
| C  | -1.150591 | 5.950650  | 0.212871  |
| H  | -1.476046 | 6.983363  | 0.280573  |

|   |           |           |           |
|---|-----------|-----------|-----------|
| C | -7.740714 | -3.254968 | -0.788997 |
| C | -6.942227 | -2.890849 | -1.875417 |
| H | -7.099659 | -3.370621 | -2.838305 |
| C | -6.558310 | -1.647143 | 0.608648  |
| C | -1.766748 | -0.630045 | 2.782302  |
| H | -0.685490 | -0.509528 | 2.899657  |
| H | -2.164138 | -1.084655 | 3.693496  |
| H | -2.201310 | 0.373550  | 2.689419  |
| C | -5.107037 | -1.502116 | -2.935724 |
| H | -5.253833 | -0.440183 | -3.163099 |
| H | -5.363478 | -2.079149 | -3.827451 |
| H | -4.042064 | -1.646530 | -2.725557 |
| C | 6.900387  | -0.115619 | 0.411027  |
| C | 2.028373  | -3.390819 | -1.113920 |
| H | 0.990348  | -3.589167 | -0.826135 |
| H | 2.438737  | -4.281872 | -1.598280 |
| H | 2.004666  | -2.585313 | -1.859753 |
| C | 4.184819  | 3.253845  | -0.863862 |
| C | -8.825229 | -4.288802 | -0.950008 |
| H | -9.031607 | -4.800395 | -0.005535 |
| H | -8.550873 | -5.041607 | -1.694829 |
| H | -9.758349 | -3.819634 | -1.283049 |
| C | 6.416969  | -1.443323 | -1.607264 |
| C | 2.566020  | -0.689127 | 3.115546  |
| H | 2.439073  | 0.307796  | 2.676576  |
| H | 3.236449  | -0.595649 | 3.974633  |
| H | 1.583110  | -1.007660 | 3.480950  |
| C | 6.422823  | 0.834469  | 1.471642  |
| H | 6.150968  | 1.799525  | 1.026219  |
| H | 7.202731  | 1.009143  | 2.216928  |
| H | 5.536988  | 0.439471  | 1.981697  |
| C | -4.284565 | -4.450761 | 0.638956  |
| H | -3.775582 | -5.415905 | 0.535311  |
| H | -5.036154 | -4.384554 | -0.154932 |
| H | -4.808688 | -4.447168 | 1.598627  |
| C | -6.340856 | -0.947561 | 1.919738  |
| H | -5.304337 | -1.061648 | 2.257481  |
| H | -7.002655 | -1.350527 | 2.689983  |
| H | -6.543496 | 0.125902  | 1.820037  |
| C | 6.327370  | -3.647238 | 1.524035  |
| H | 6.356325  | -4.445783 | 2.275006  |
| H | 7.012971  | -2.858386 | 1.849834  |
| H | 6.715501  | -4.053444 | 0.585231  |
| C | 5.432670  | -1.881905 | -2.654812 |
| H | 4.566095  | -2.369317 | -2.195710 |
| H | 5.893617  | -2.583458 | -3.354606 |
| H | 5.061477  | -1.023486 | -3.226129 |
| C | 8.652573  | -1.441717 | -0.642037 |
| C | 8.214828  | -0.569341 | 0.354903  |
| H | 8.917889  | -0.226938 | 1.110310  |

|                                                   |           |           |           |
|---------------------------------------------------|-----------|-----------|-----------|
| C                                                 | 7.741785  | -1.867456 | -1.610145 |
| H                                                 | 8.072899  | -2.545162 | -2.393442 |
| C                                                 | 10.090515 | -1.889856 | -0.691529 |
| H                                                 | 10.694716 | -1.186553 | -1.276660 |
| H                                                 | 10.186569 | -2.874089 | -1.159711 |
| H                                                 | 10.527256 | -1.944410 | 0.310118  |
| <b>18 (optimized equilibrium model structure)</b> |           |           |           |
| Pt                                                | -2.773820 | 1.743133  | 0.022805  |
| Pt                                                | 1.969938  | 1.001800  | -0.148366 |
| S                                                 | -7.321558 | 2.621524  | 0.355972  |
| S                                                 | 5.562971  | 3.884706  | -1.153724 |
| N                                                 | -1.624651 | 3.436976  | 0.127454  |
| N                                                 | -0.543290 | -0.292008 | 0.246735  |
| N                                                 | 0.082718  | 1.872596  | 0.032406  |
| N                                                 | 1.123337  | -1.742200 | 0.812041  |
| N                                                 | -4.547526 | 2.795831  | 0.044001  |
| N                                                 | 4.739600  | -0.272864 | -0.530023 |
| C                                                 | 0.878386  | -0.575598 | 0.379260  |
| C                                                 | -0.932567 | 0.976646  | 0.092466  |
| C                                                 | -0.299997 | 3.193428  | 0.087811  |
| N                                                 | -4.701239 | -0.622371 | -0.349380 |
| N                                                 | 0.149868  | 5.533377  | 0.238998  |
| C                                                 | -2.017677 | -1.721538 | 1.574368  |
| C                                                 | -5.725612 | 2.709117  | 0.177022  |
| C                                                 | 2.431826  | -2.214493 | 0.999402  |
| C                                                 | 2.943178  | -3.128994 | 0.068420  |
| C                                                 | -1.460400 | -1.392418 | 0.340157  |
| N                                                 | 3.069460  | 2.700075  | -0.686654 |
| C                                                 | -1.724439 | -2.123929 | -0.820639 |
| C                                                 | 5.021575  | -3.239026 | 1.333287  |
| C                                                 | -3.874957 | 0.175567  | -0.180411 |
| C                                                 | 0.585222  | 4.289407  | 0.150947  |
| H                                                 | 1.654399  | 4.119287  | 0.116545  |
| C                                                 | 4.232324  | -3.623488 | 0.251935  |
| H                                                 | 4.635831  | -4.321616 | -0.479490 |
| C                                                 | -2.889779 | -2.809066 | 1.622322  |
| H                                                 | -3.341368 | -3.078952 | 2.574409  |
| C                                                 | 3.653152  | 0.102903  | -0.354957 |
| C                                                 | -5.688732 | -1.581602 | -0.501713 |
| C                                                 | -2.074852 | 4.701490  | 0.211701  |
| H                                                 | -3.151028 | 4.826815  | 0.233974  |
| C                                                 | -3.191652 | -3.558855 | 0.487817  |
| C                                                 | 3.184882  | -1.840196 | 2.124931  |
| C                                                 | -2.592864 | -3.205936 | -0.723746 |
| H                                                 | -2.821155 | -3.784210 | -1.616820 |
| C                                                 | -5.862360 | -2.166527 | -1.760766 |
| C                                                 | -1.123579 | -1.706183 | -2.135849 |
| H                                                 | -1.524394 | -0.736808 | -2.458754 |
| H                                                 | -1.339035 | -2.441168 | -2.916190 |
| H                                                 | -0.037541 | -1.593743 | -2.061600 |

|   |           |           |           |
|---|-----------|-----------|-----------|
| C | 4.470751  | -2.358218 | 2.263760  |
| H | 5.065345  | -2.056859 | 3.124687  |
| C | 6.066493  | -0.668342 | -0.567454 |
| C | -7.428353 | -2.900153 | 0.445163  |
| H | -8.042262 | -3.183200 | 1.296576  |
| C | -1.174437 | 5.742678  | 0.266554  |
| H | -1.516766 | 6.769394  | 0.338549  |
| C | -7.632838 | -3.525859 | -0.785020 |
| C | -6.843300 | -3.146505 | -1.872938 |
| H | -7.000417 | -3.621956 | -2.838052 |
| C | -6.461358 | -1.914115 | 0.616549  |
| C | -1.711698 | -0.905614 | 2.799697  |
| H | -0.632266 | -0.775823 | 2.923460  |
| H | -2.107271 | -1.385888 | 3.698421  |
| H | -2.157385 | 0.094500  | 2.726403  |
| C | -5.025699 | -1.731307 | -2.931228 |
| H | -5.184494 | -0.669427 | -3.150843 |
| H | -5.278023 | -2.304914 | -3.826357 |
| H | -3.958738 | -1.865028 | -2.724280 |
| C | 6.919873  | -0.182105 | 0.430554  |
| C | 2.122535  | -3.510675 | -1.134230 |
| H | 1.086350  | -3.725254 | -0.851498 |
| H | 2.542985  | -4.387236 | -1.636271 |
| H | 2.090330  | -2.690061 | -1.863267 |
| C | 4.129750  | 3.191021  | -0.886956 |
| C | -8.707312 | -4.569834 | -0.948257 |
| H | -8.914029 | -5.080396 | -0.003339 |
| H | -8.422110 | -5.322502 | -1.689185 |
| H | -9.642813 | -4.110323 | -1.288060 |
| C | 6.487132  | -1.529845 | -1.584957 |
| C | 2.623011  | -0.887633 | 3.147493  |
| H | 2.487121  | 0.117307  | 2.730582  |
| H | 3.288715  | -0.808172 | 4.011762  |
| H | 1.641960  | -1.225343 | 3.500440  |
| C | 6.407521  | 0.764280  | 1.478571  |
| H | 6.099228  | 1.713515  | 1.023109  |
| H | 7.179548  | 0.977442  | 2.221871  |
| H | 5.536294  | 0.343022  | 1.993198  |
| C | -4.149140 | -4.719894 | 0.550048  |
| H | -3.623701 | -5.670797 | 0.405467  |
| H | -4.910051 | -4.638275 | -0.233584 |
| H | -4.663460 | -4.762320 | 1.514080  |
| C | -6.245435 | -1.215969 | 1.928947  |
| H | -5.207275 | -1.323852 | 2.263755  |
| H | -6.902571 | -1.624396 | 2.700276  |
| H | -6.454391 | -0.143377 | 1.833657  |
| C | 6.425937  | -3.759530 | 1.499214  |
| H | 6.474610  | -4.541608 | 2.266294  |
| H | 7.108051  | -2.956782 | 1.797864  |
| H | 6.804563  | -4.181259 | 0.563429  |

|   |           |           |           |
|---|-----------|-----------|-----------|
| C | 5.525381  | -1.987574 | -2.645190 |
| H | 4.652914  | -2.474329 | -2.197333 |
| H | 6.003862  | -2.694282 | -3.327868 |
| H | 5.160337  | -1.138023 | -3.233606 |
| C | 8.710325  | -1.479828 | -0.592164 |
| C | 8.243862  | -0.609002 | 0.393349  |
| H | 8.931020  | -0.247861 | 1.154701  |
| C | 7.819718  | -1.928663 | -1.568667 |
| H | 8.173351  | -2.604467 | -2.343777 |
| C | 10.156849 | -1.901544 | -0.620970 |
| H | 10.754620 | -1.194318 | -1.208014 |
| H | 10.275834 | -2.889336 | -1.076255 |
| H | 10.583647 | -1.936360 | 0.385825  |

## S5. CCDC search

This search was conducted using the ConQuest program (v 2.0.1) for crystal structures of Pd<sup>II</sup> and Pt<sup>II</sup> complexes with monodentate N-coordinated thiocyanates ligands with the following secondary search criteria: atomic coordinates error free after CSD checks; no disorder in the crystal structure; no powder studies, and a crystallographic R factor < 0.1. The processing of the CSD data revealed 52 structures with palladium (31 examples) and platinum (21 examples) metal centres. The coordination angle  $\angle\text{M-N=C}$  in obtained entries varies in the 155.747–180.0° range, while the values of M–N bond length slightly change in the range of 0,16 Å (from 1.969 to 2.13 Å and 1.958 to 2.113 Å for Pd–N and Pt–N bonds respectively), but generally one can notice the tendency of M–N distance's decreasing with M–N=C angle's growth (**Figure S17**). The average values of N–C and C–S bonds in isothiocyanate ligand are also vary in  $3\sigma$  range ( $1.141 \pm 0.017$  Å and  $1.623 \pm 0.014$  Å for palladium complexes:  $1.138 \pm 0.020$  Å and  $1.623 \pm 0.012$  Å for platinum respectively) and are close to meanings for a triple C $\equiv$ N bond<sup>7</sup> and a double C=S bond<sup>7</sup>.

Thus, the large variety of  $\angle\text{M-N=C}$  angle together with insignificant changes in the structure of the N=C=S fragment is most likely associated with packing effects that is in agreement with reports in previous works<sup>8</sup>.

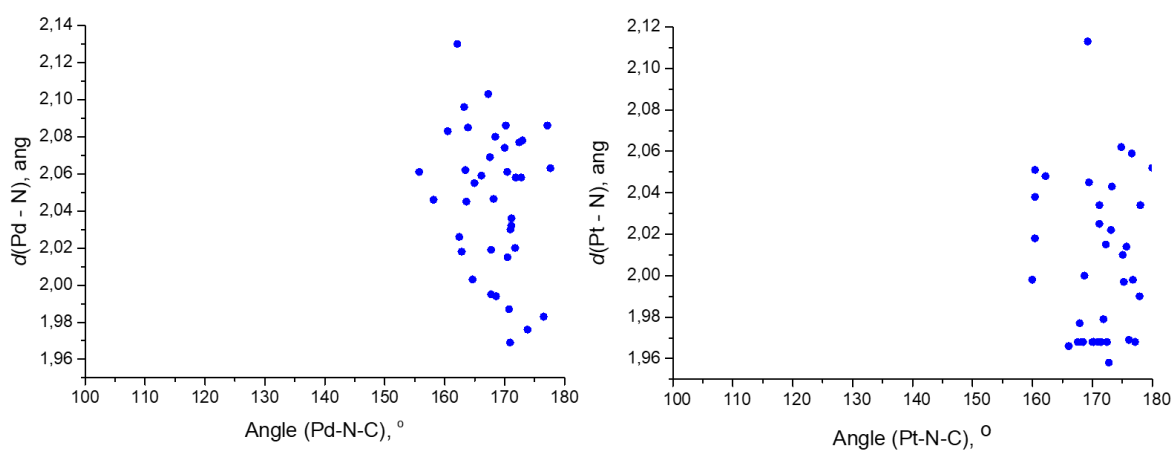

**Figure S17.** The dependence  $d(\text{M-N})/\angle(\text{M-N=C})$  ( $\text{M} = \text{Pd}$  (left),  $\text{Pt}$  (right)) according to the CSD search.

## S6. Hirshfeld analysis

**Table S15.** Results of the Hirshfeld surface analysis.

| X-ray structure | Contributions of different intermolecular contacts to the molecular Hirshfeld surface*                                     |
|-----------------|----------------------------------------------------------------------------------------------------------------------------|
| <b>16</b>       | H–H 51.7%, C–H 8.9%, S–H 9.5%, N–H 4.9%, Pd–H 1.1%, C–C 1.0%, S–C 0.7%, C–N 0.6%, C–S 0.6%, N–S 0.4%, N–N 0.3%.            |
| <b>18</b>       | H–H 51.0%, C–H 9.2%, S–H 9.1%, N–H 5.1%, C–C 1.2%, Pt–H 1.1%, S–C 0.7%, C–N 0.6%, C–S 0.6%, N–S 0.4%, N–N 0.3%, C–Pt 0.1%. |

\*The contributions of all other intermolecular contacts do not exceed 0%.

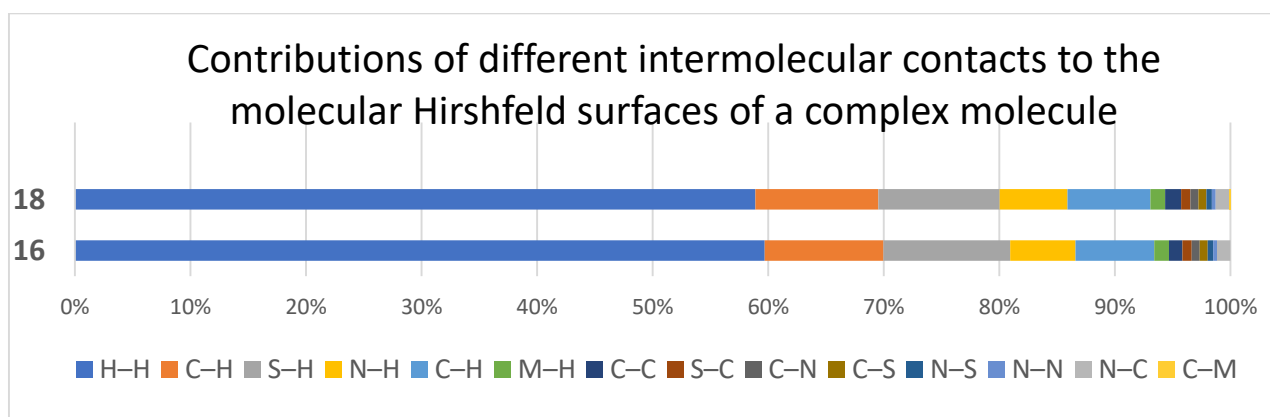

**Figure S18.** Contributions of various intermolecular contacts to the molecular Hirshfeld surfaces of **16** and **18** complex molecules.

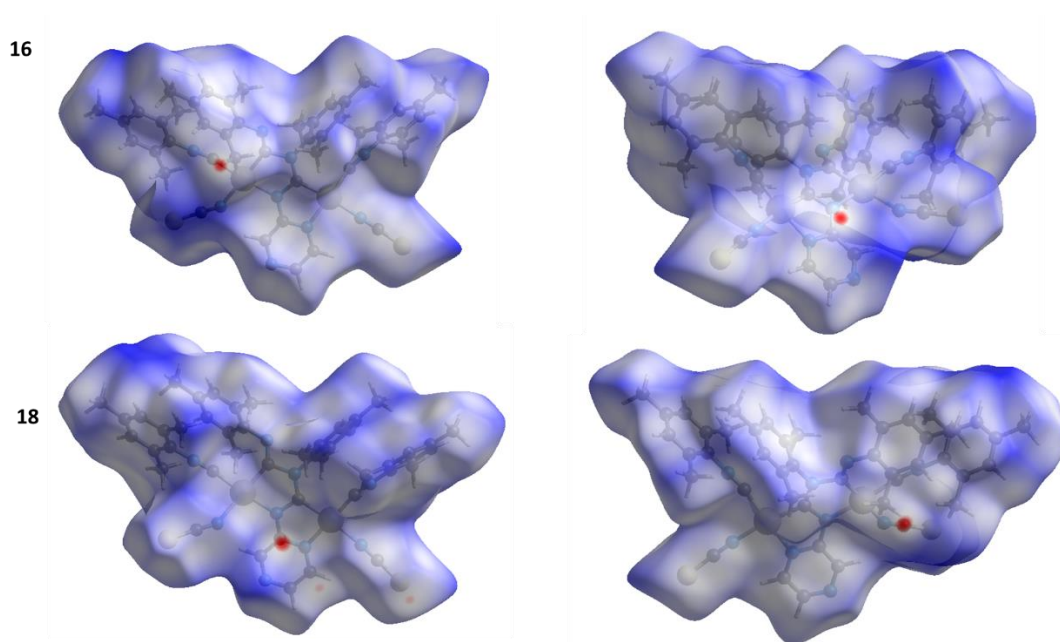

**Figure S19.** Hirshfeld surfaces for **16** and **18**.

## S7. NMR spectra for complexes 9–18

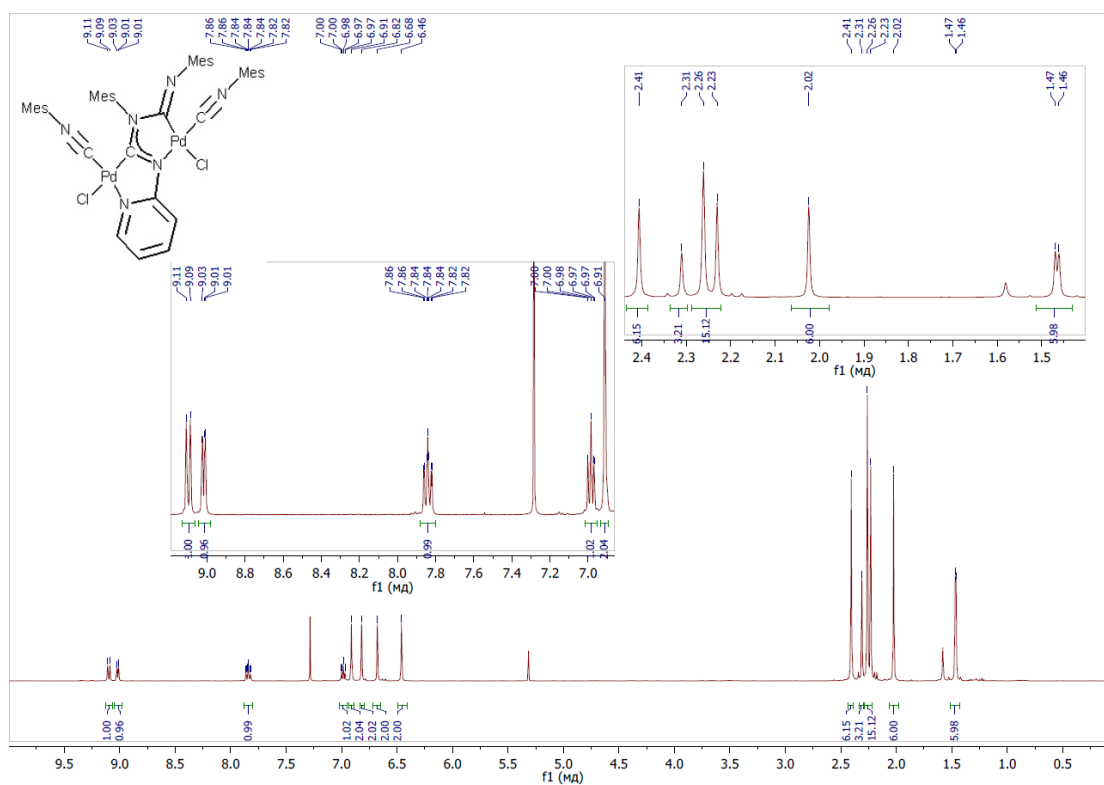

Figure S20. The <sup>1</sup>H NMR spectra of **9**.

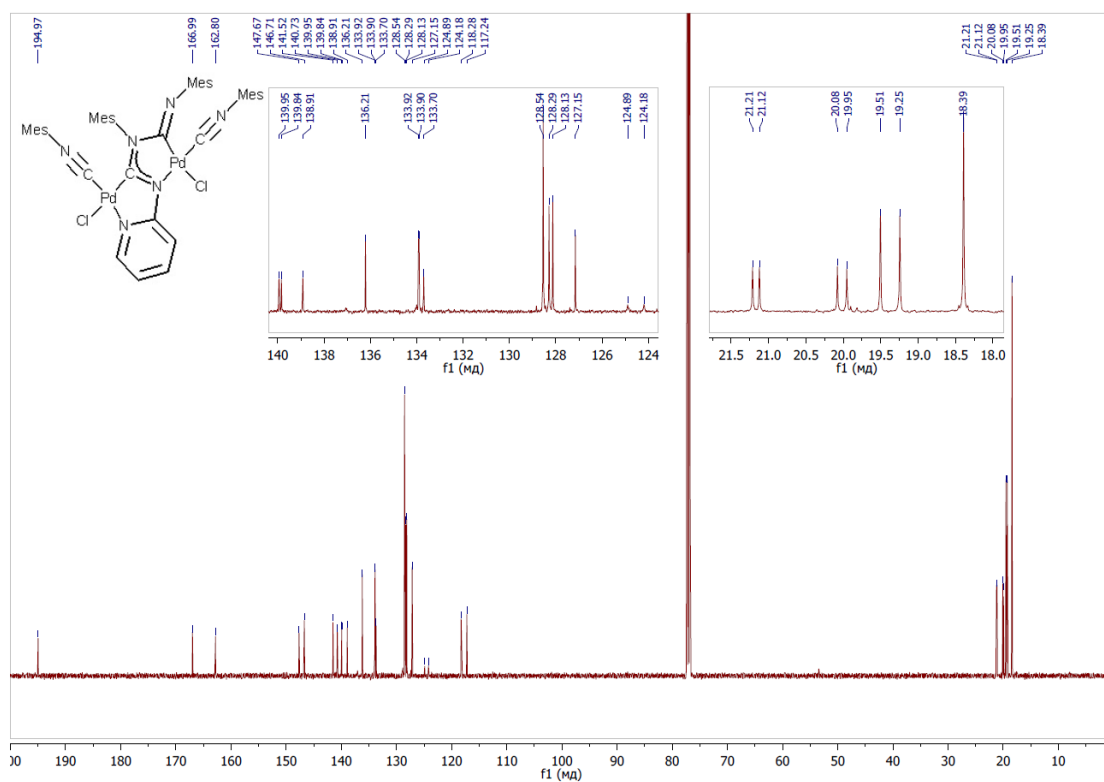

Figure S21. The <sup>13</sup>C{<sup>1</sup>H} NMR spectra of **9**.



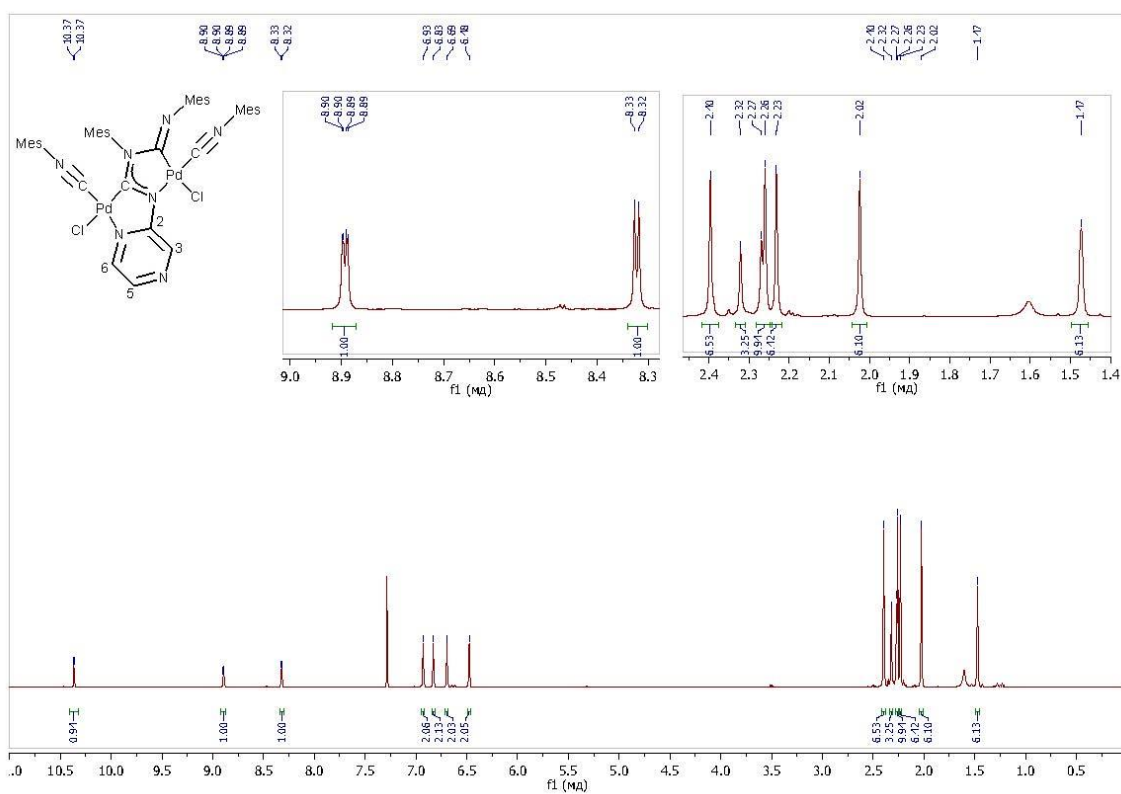

Figure S22. The  $^1\text{H}$  NMR spectra of **10**.

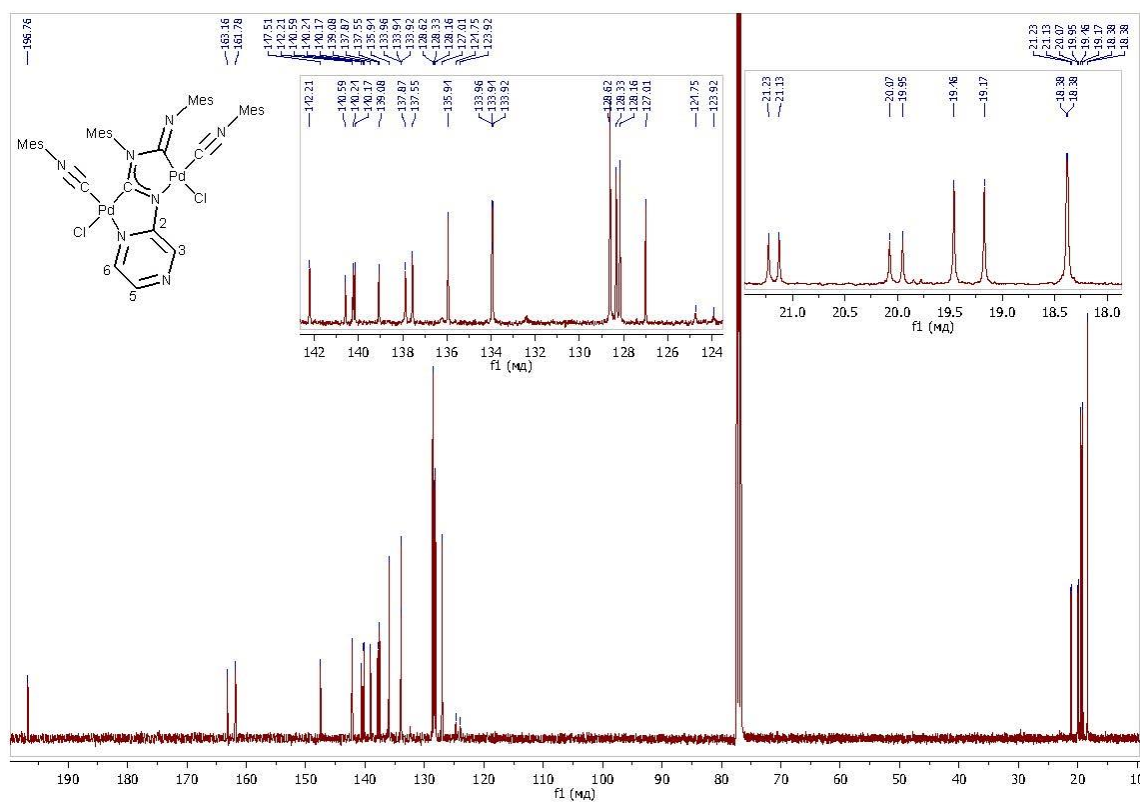

Figure S23. The  $^{13}\text{C}\{^1\text{H}\}$  NMR spectra of **10**.

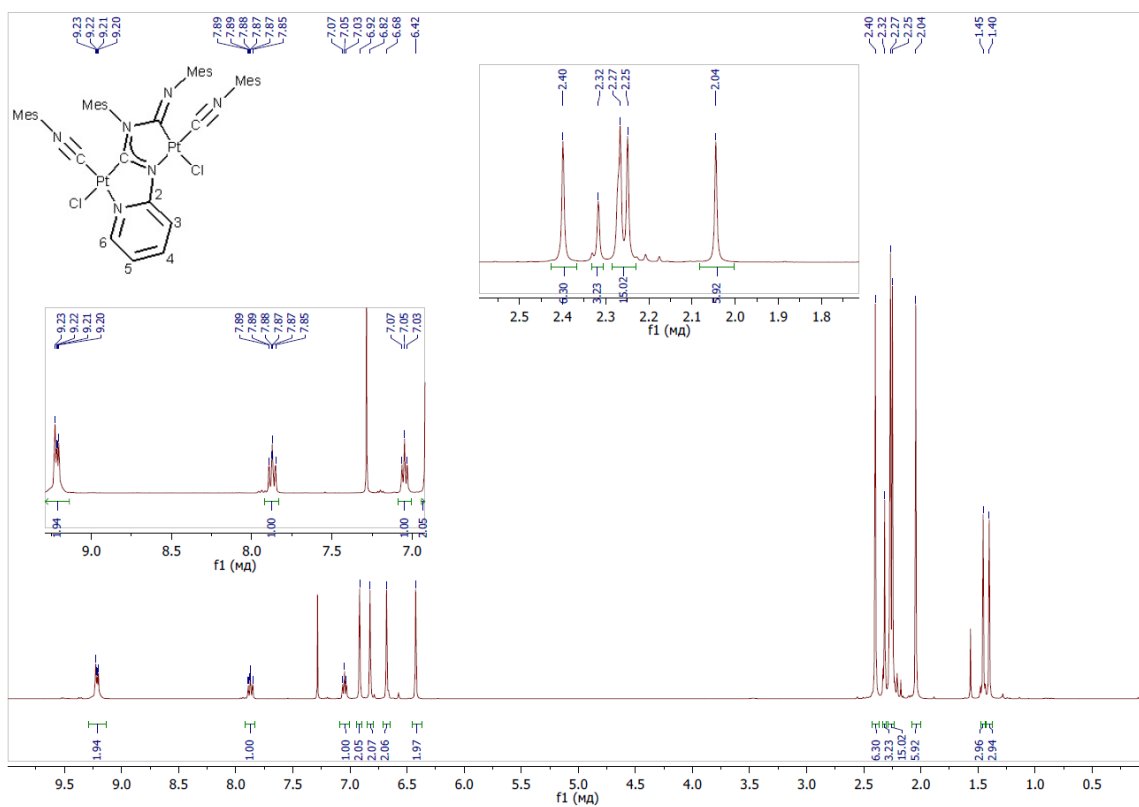

Figure S24. The <sup>1</sup>H NMR spectra of **11**.

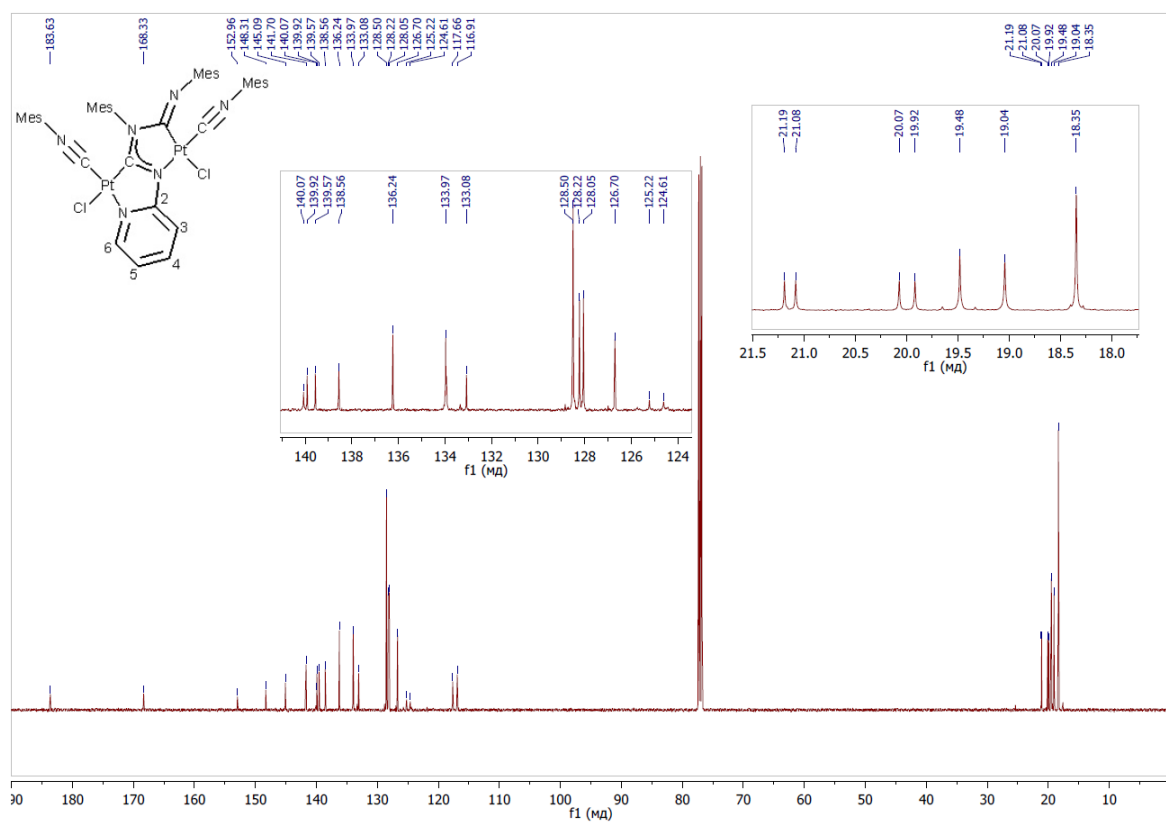

Figure S25. The <sup>13</sup>C{<sup>1</sup>H} NMR spectra of **11**.

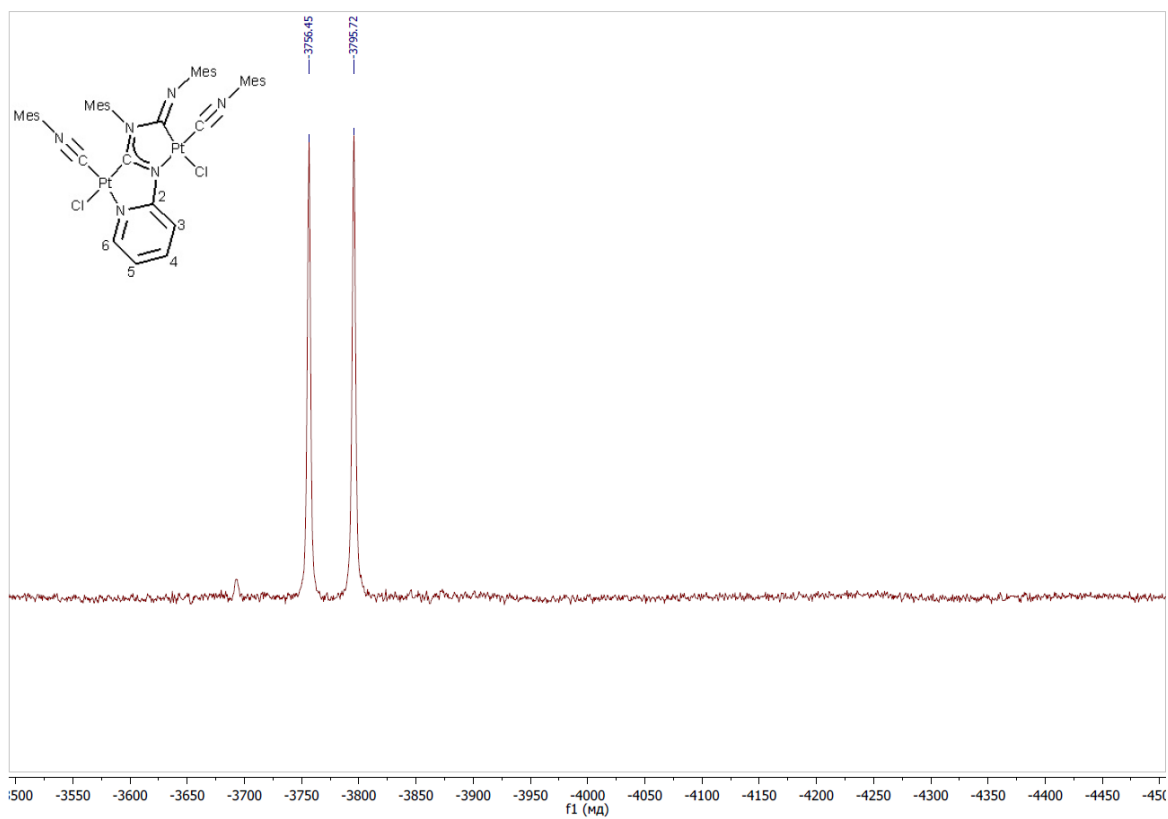

Figure S26. The  $^{195}\text{Pt}\{^1\text{H}\}$  NMR spectra of **11**.

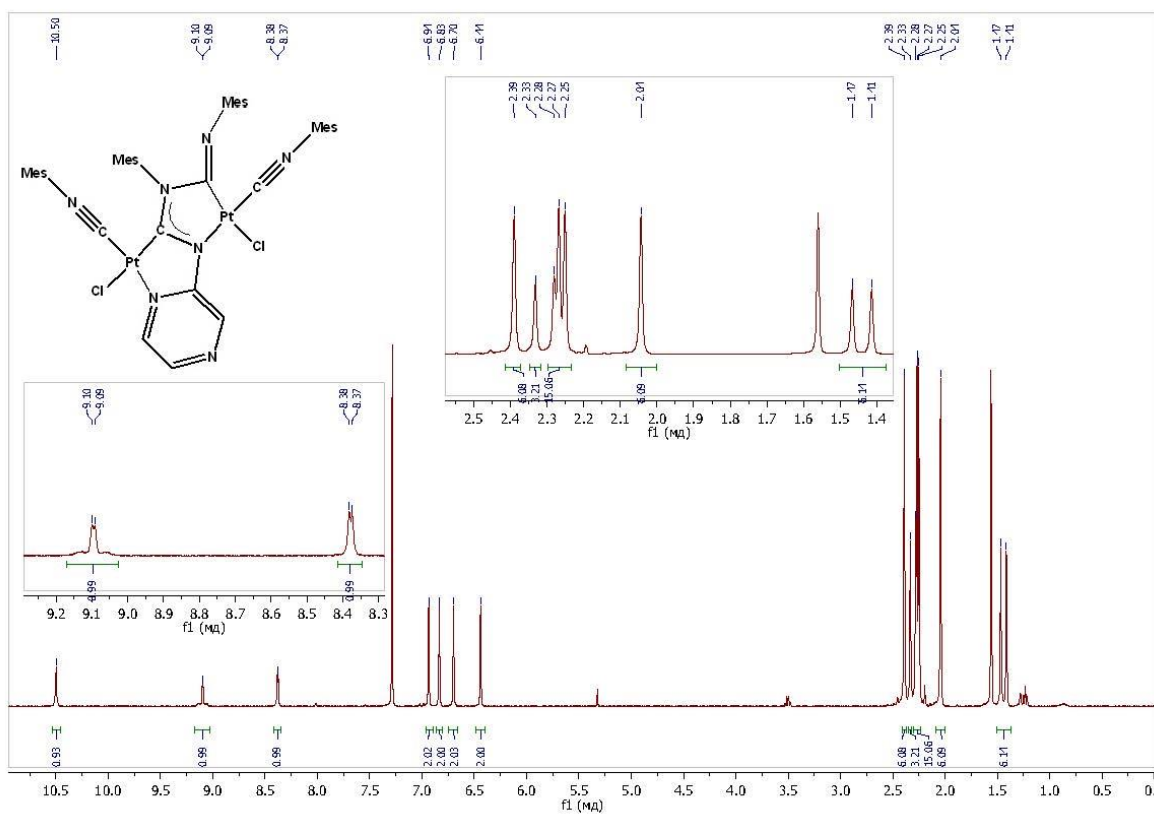

Figure S27. The  $^1\text{H}$  NMR spectra of **12**.

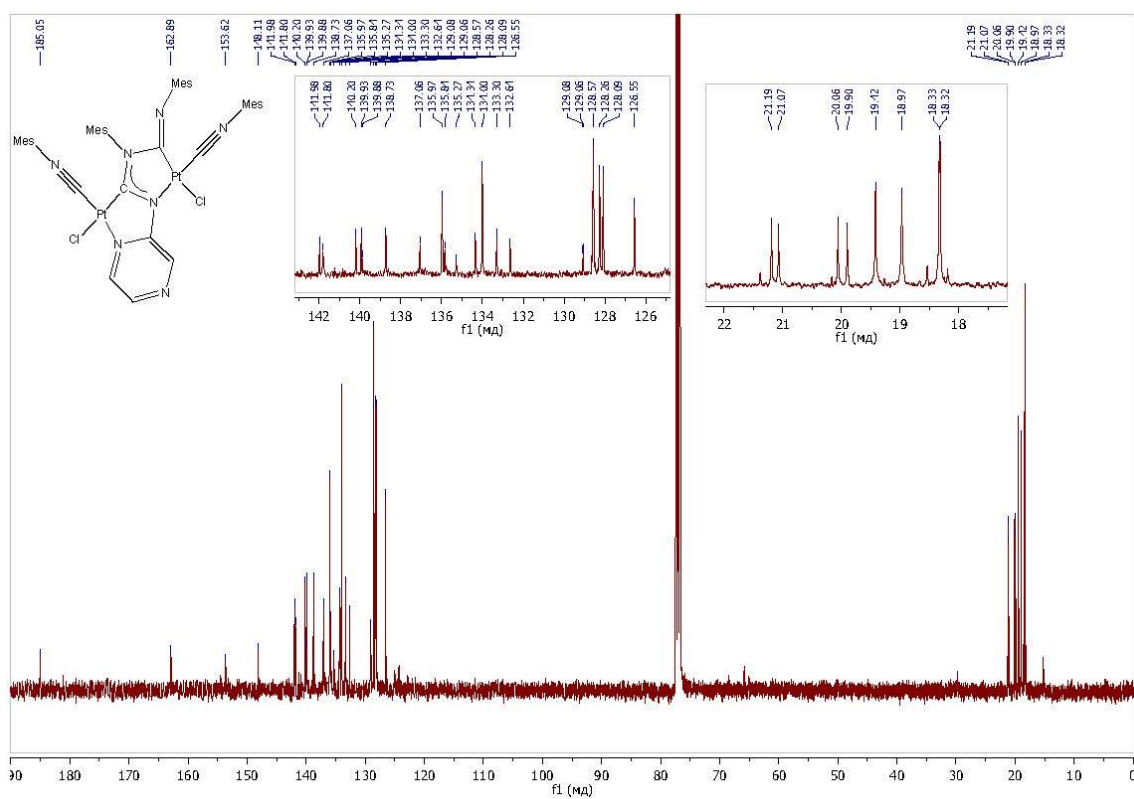

**Figure S28.** The  $^{13}\text{C}\{^1\text{H}\}$  NMR spectra of **12**.

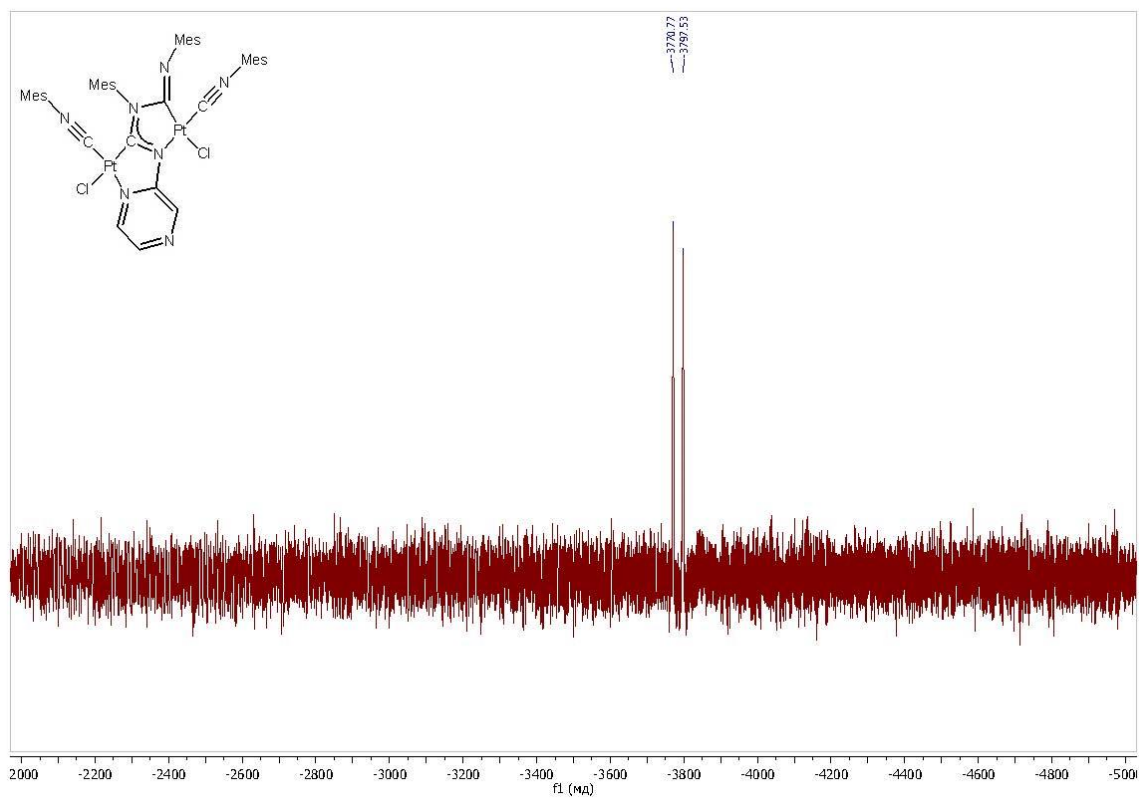

**Figure S29.** The  $^{195}\text{Pt}\{^1\text{H}\}$  NMR spectra of **12**.

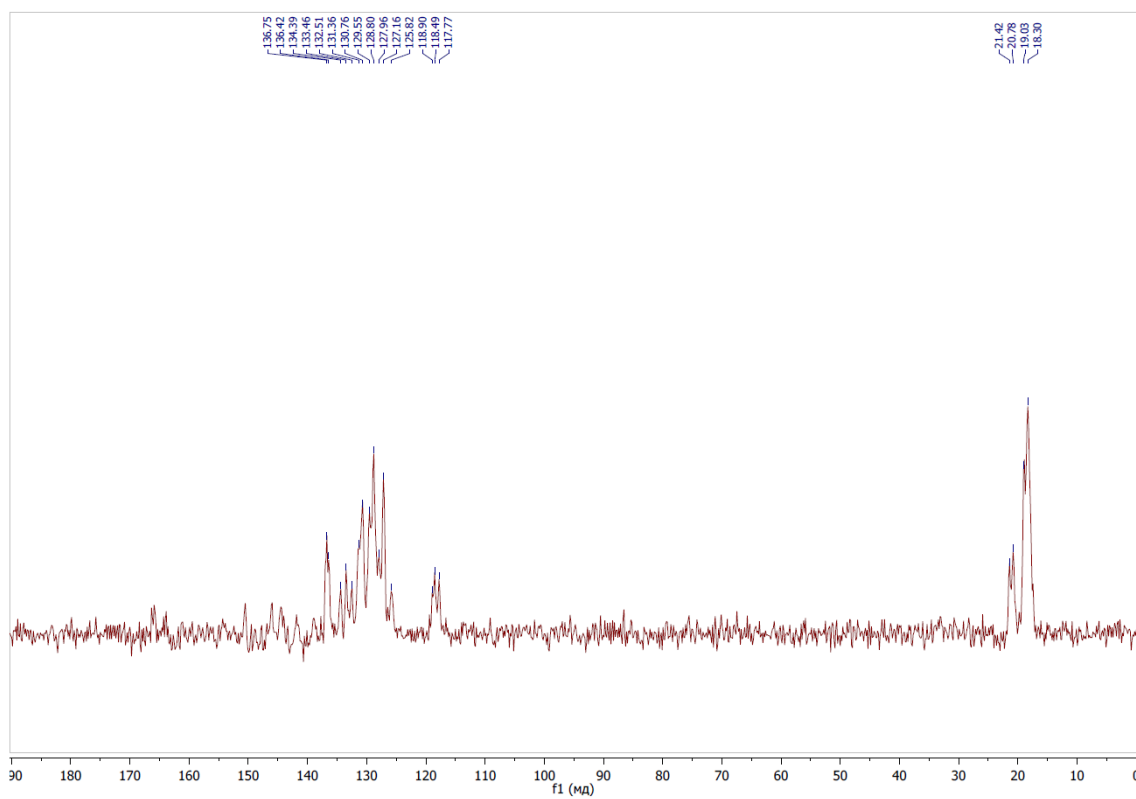

**Figure S30.** The  $^{13}\text{C}$  CP/MAS NMR spectra of **13**.

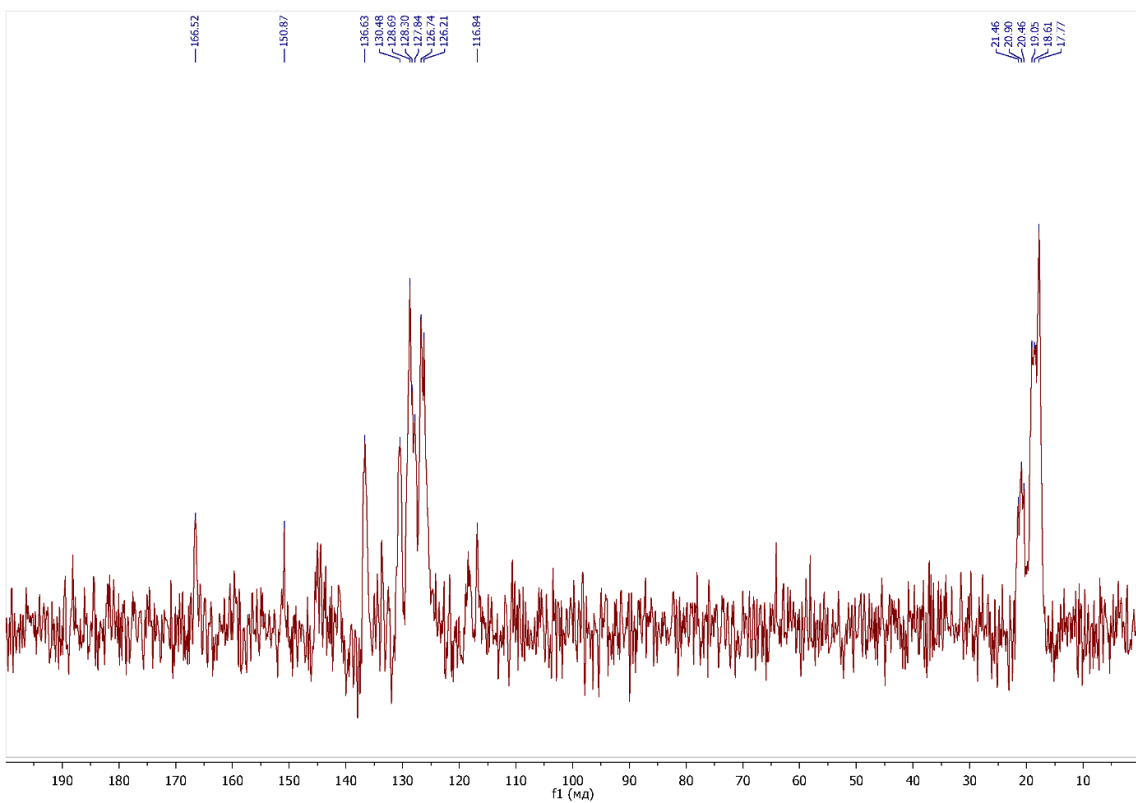

**Figure S31.** The  $^{13}\text{C}$  CP/MAS NMR spectra of **14**.

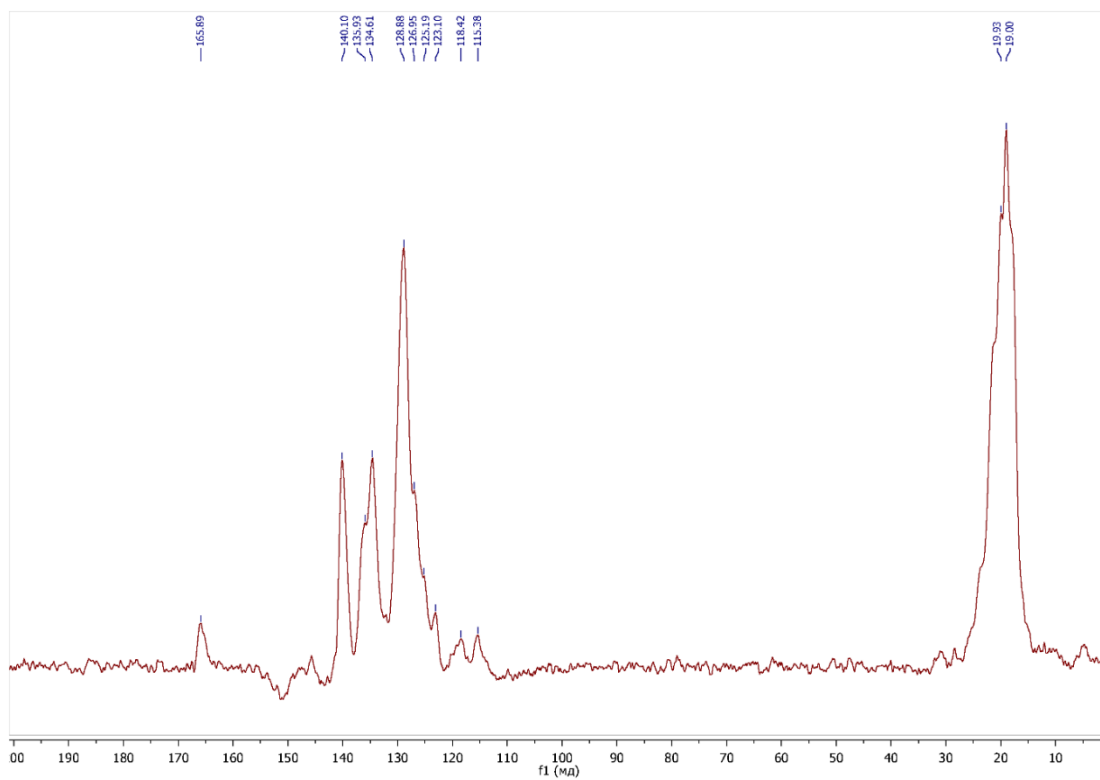

**Figure S32.** The  $^{13}\text{C}$  CP/MAS NMR spectra of **15**.

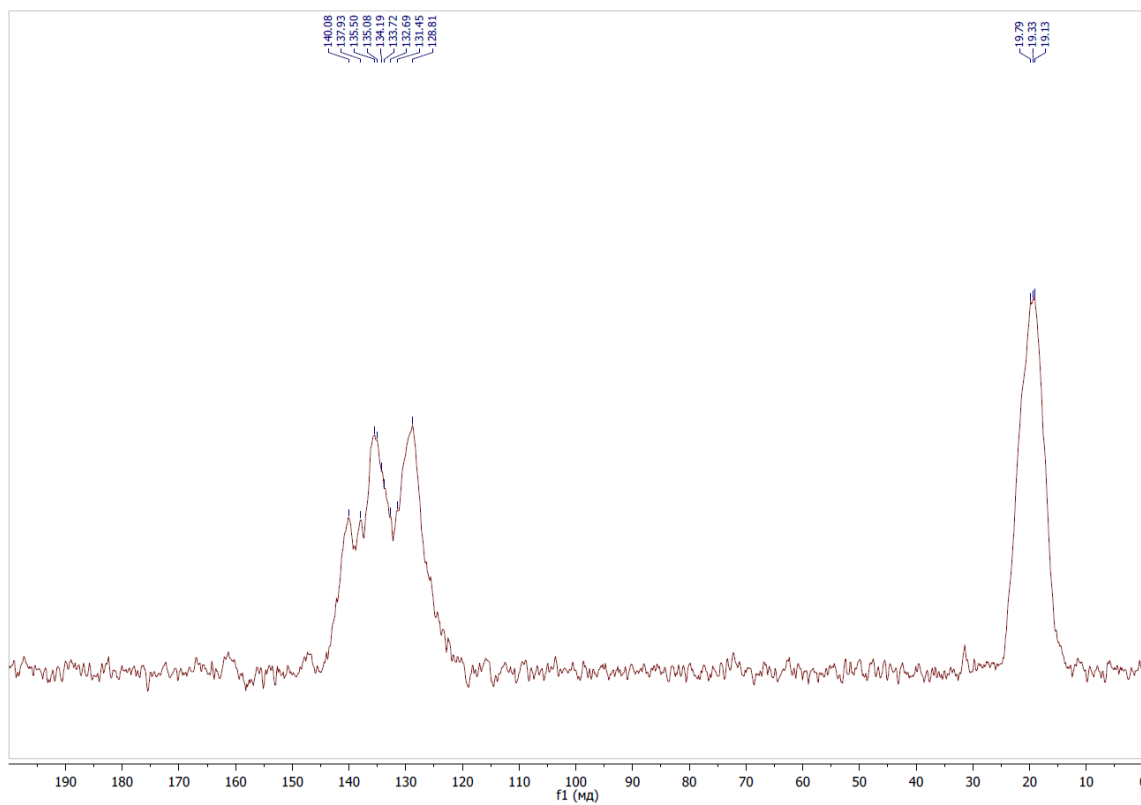

**Figure S33.** The  $^{13}\text{C}$  CP/MAS NMR spectra of **16**.

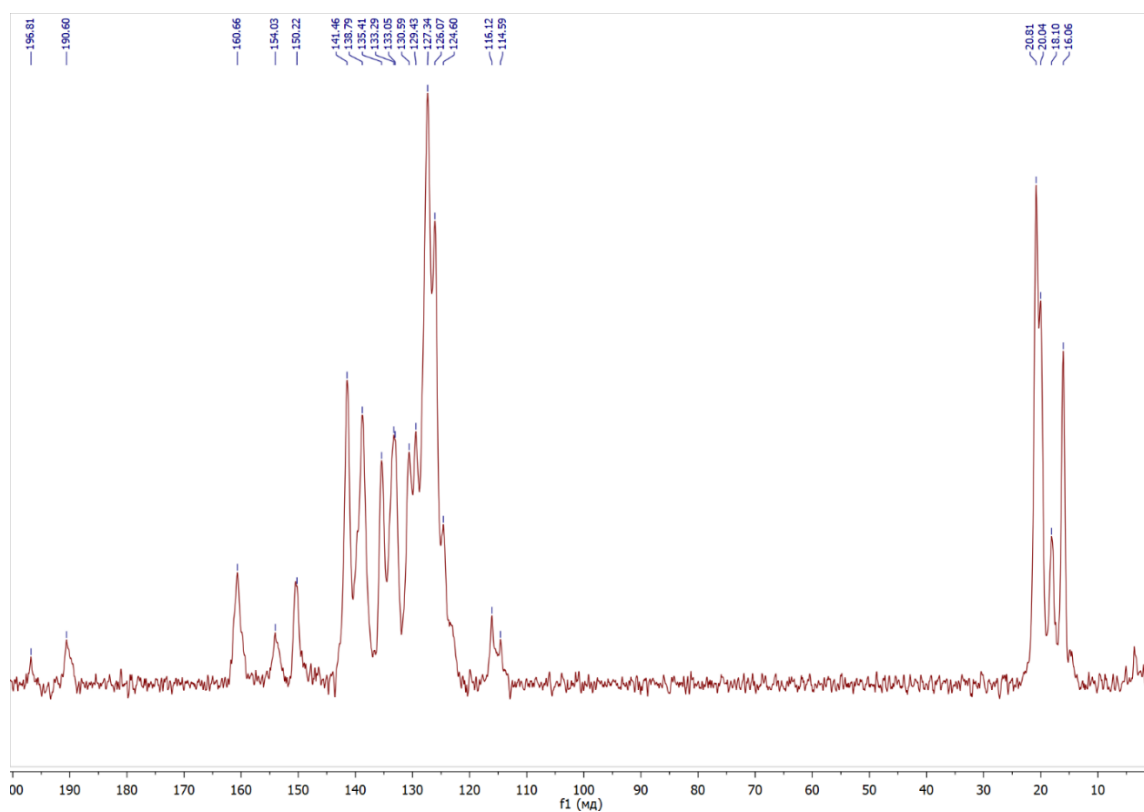

**Figure S34.** The  $^{13}\text{C}$  CP/MAS NMR spectra of **17**.

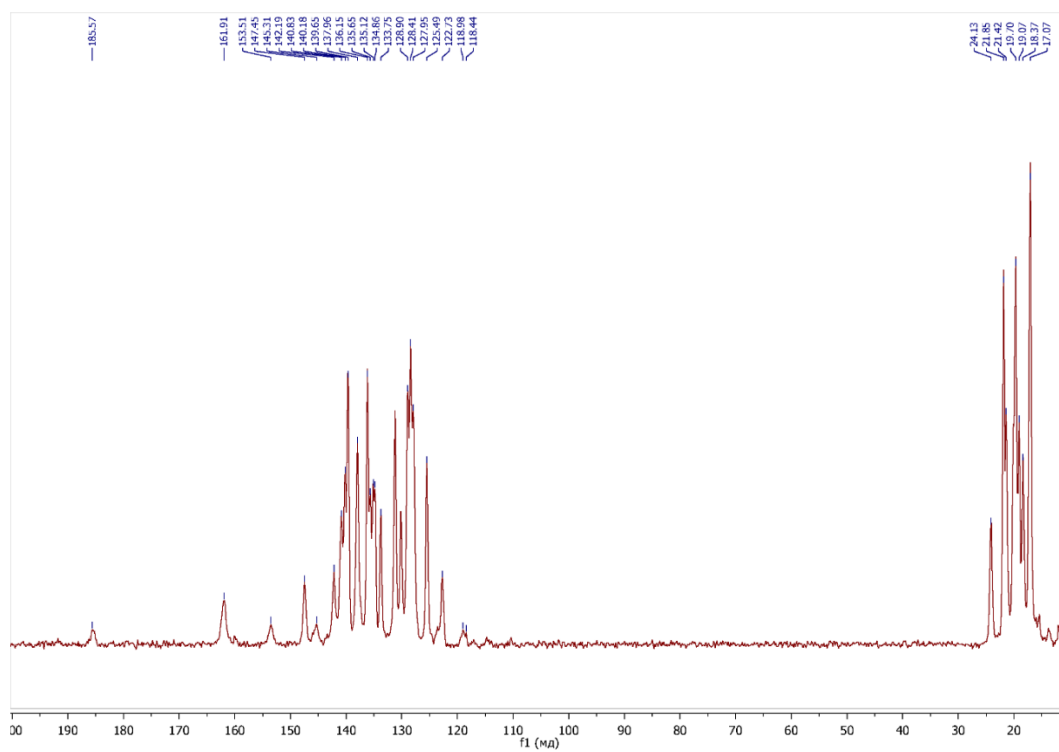

**Figure S35.** The  $^{13}\text{C}$  CP/MAS NMR spectra of **18**.

## S8. FTIR spectra for complexes 9–18

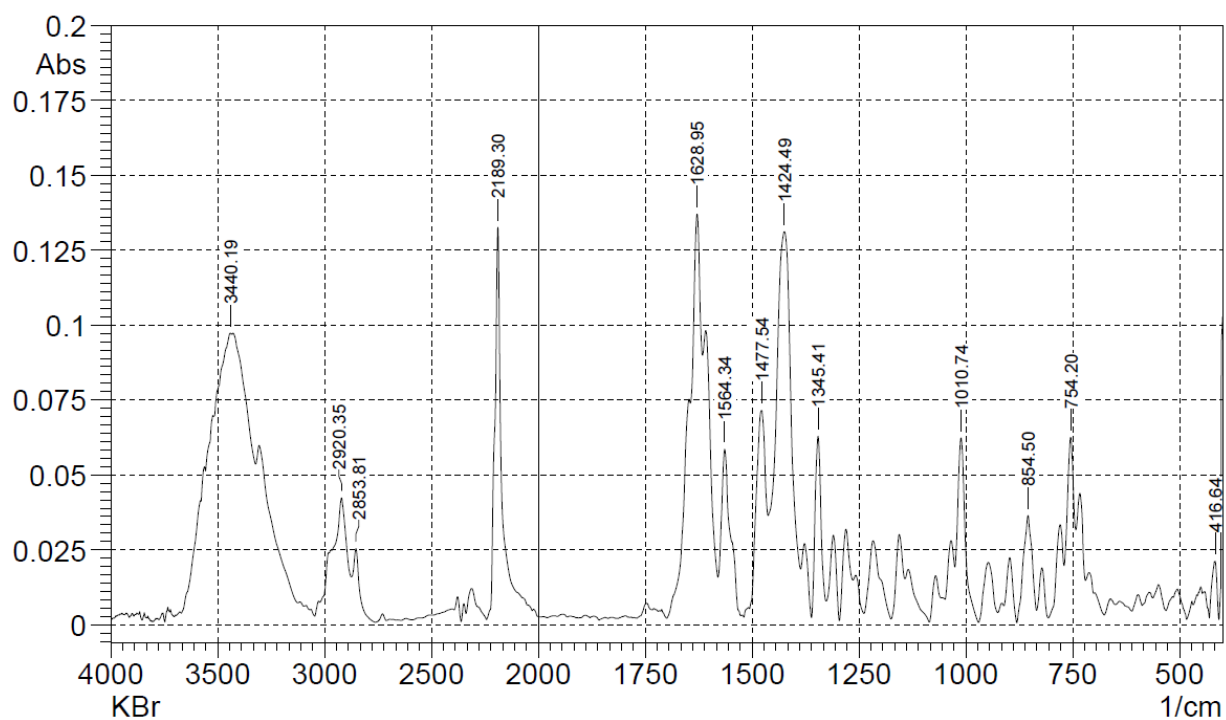

Figure S36. The FTIR spectra of 9.

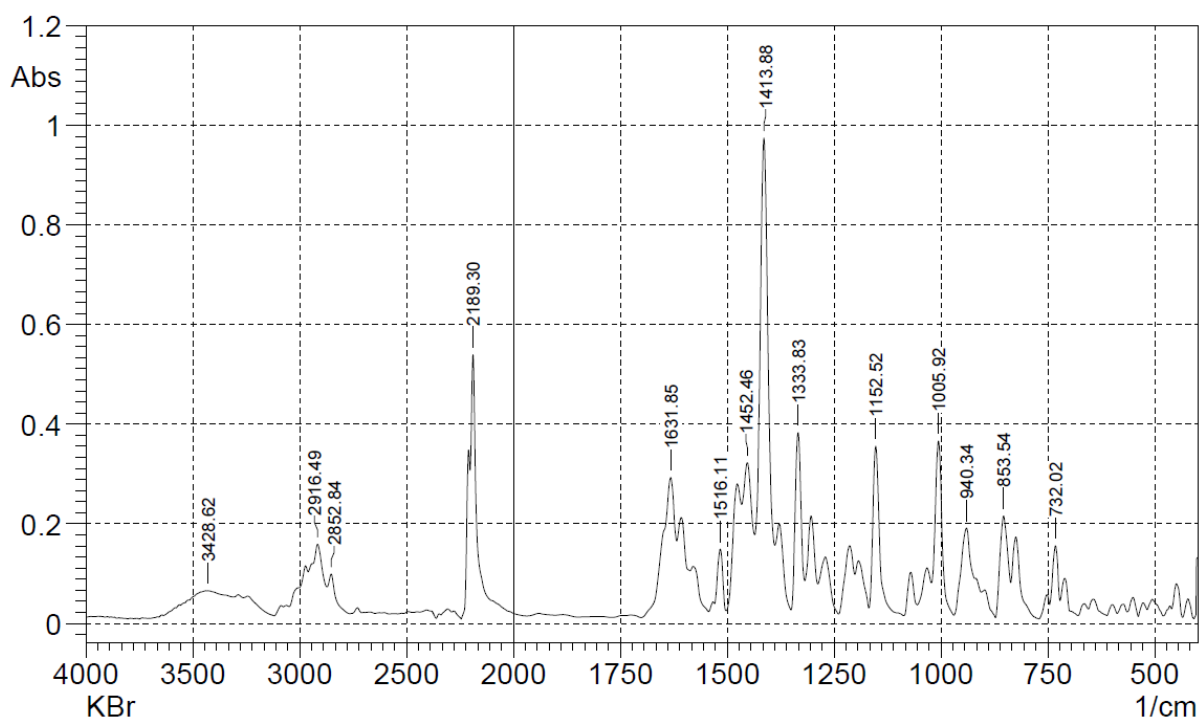

Figure S37. The FTIR spectra of 10.



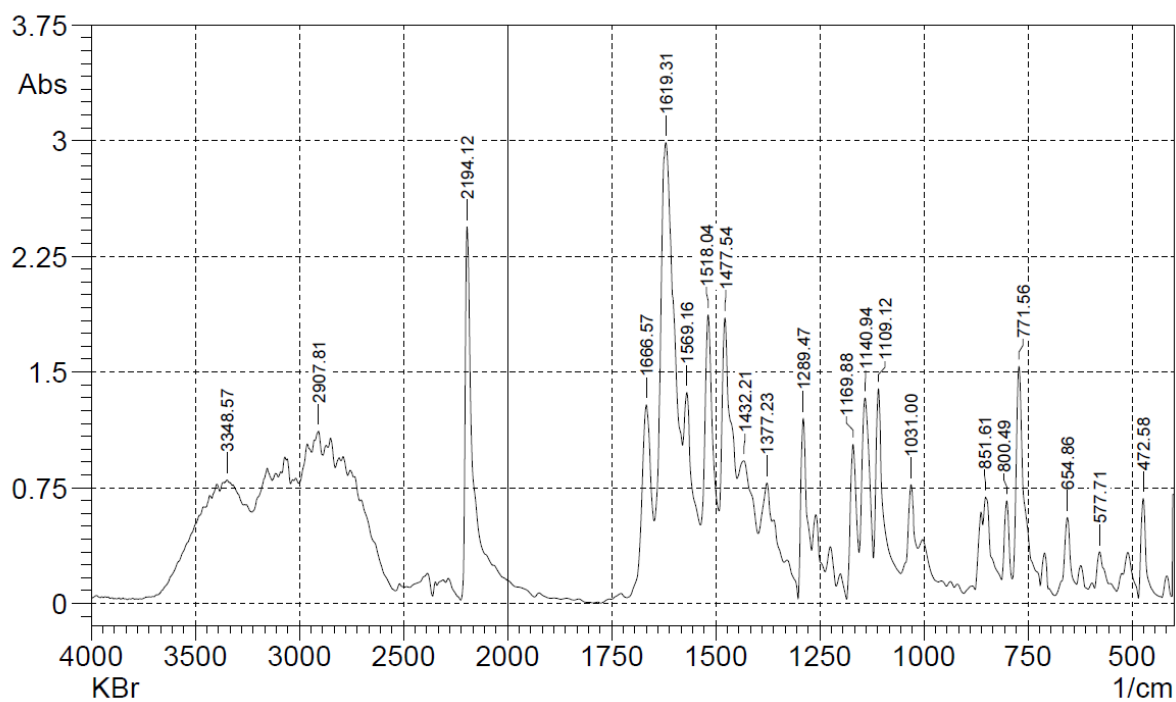

**Figure S38.** The FTIR spectra of **11**.

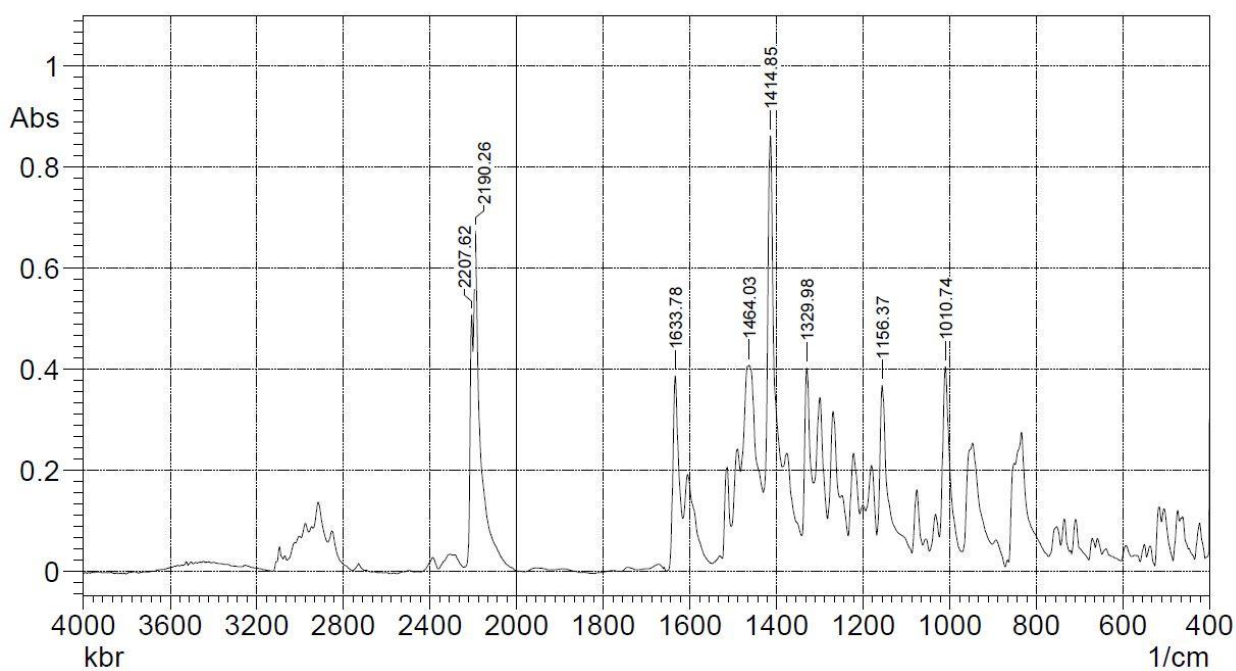

**Figure S39.** The FTIR spectra of **12**.

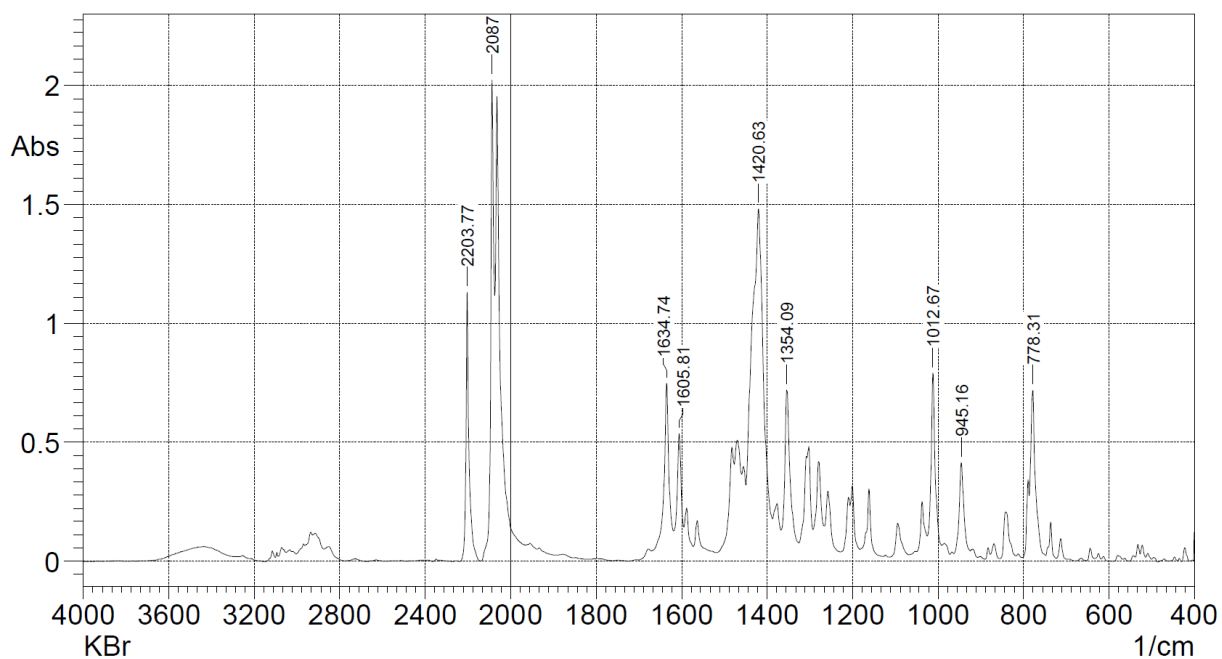

**Figure S40.** The FTIR spectra of **13**.

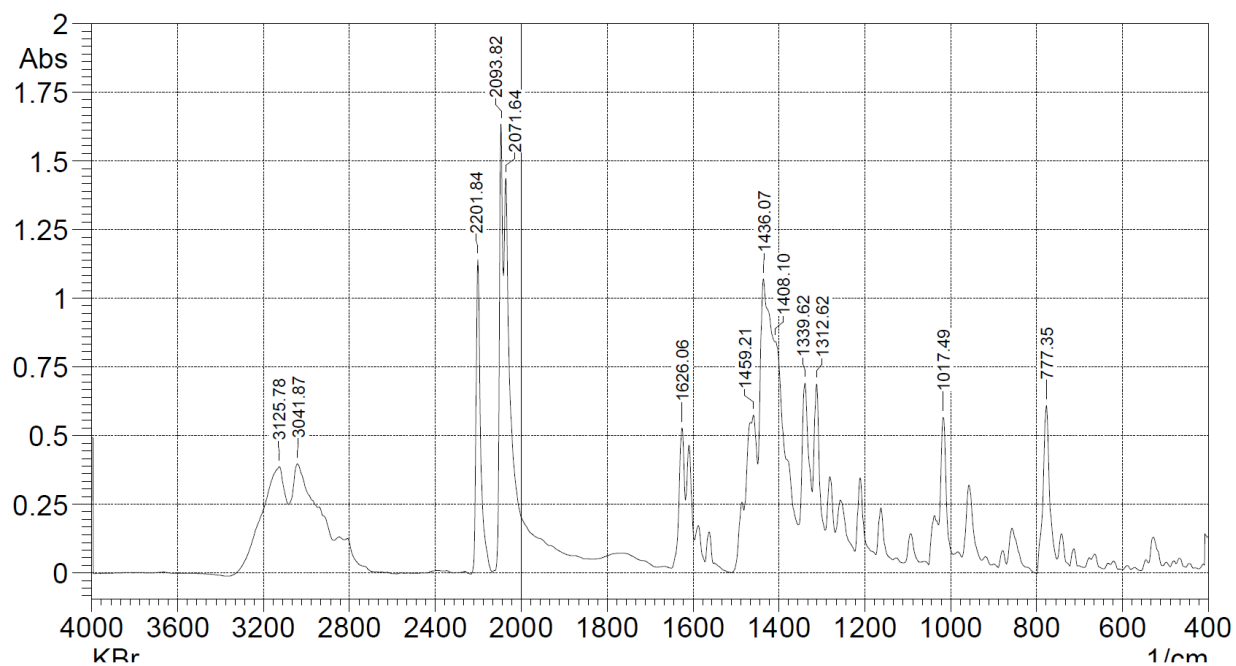

**Figure S41.** The FTIR spectra of **14**.

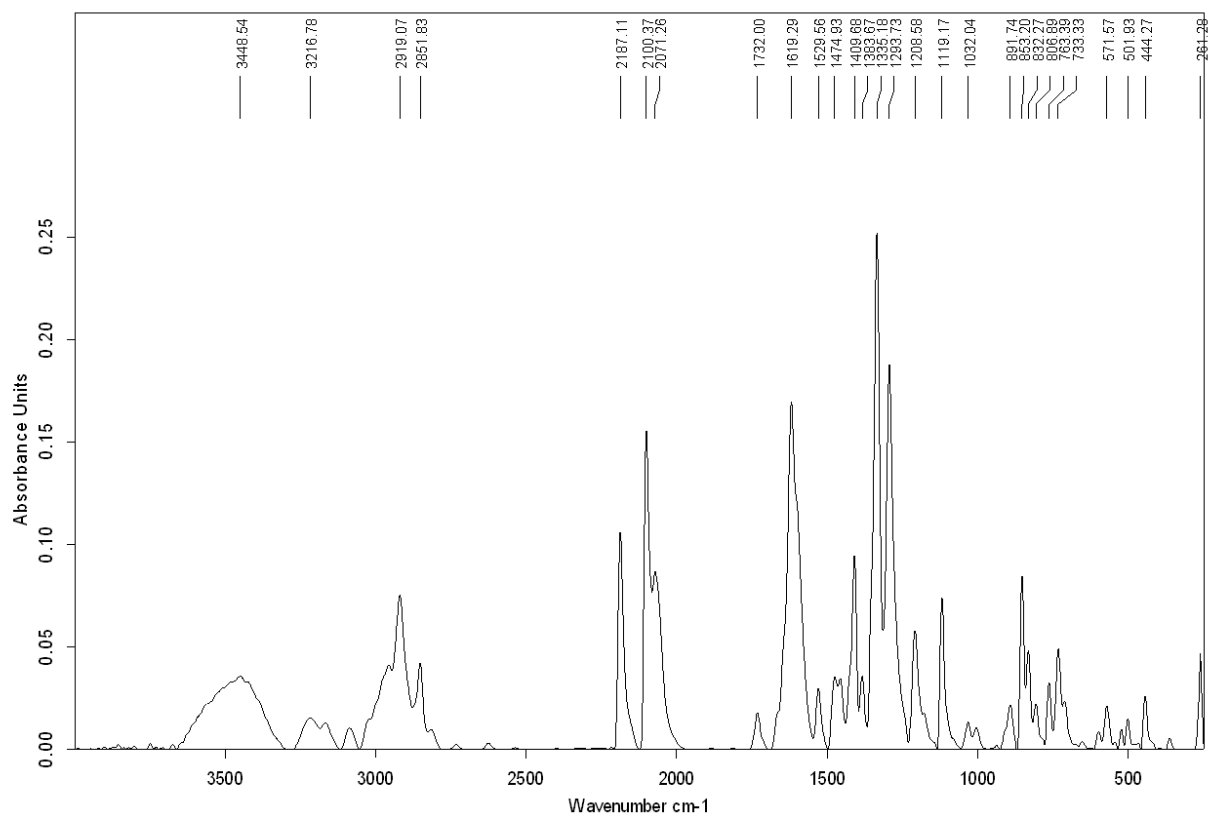

**Figure S42.** The FTIR spectra of **15**.

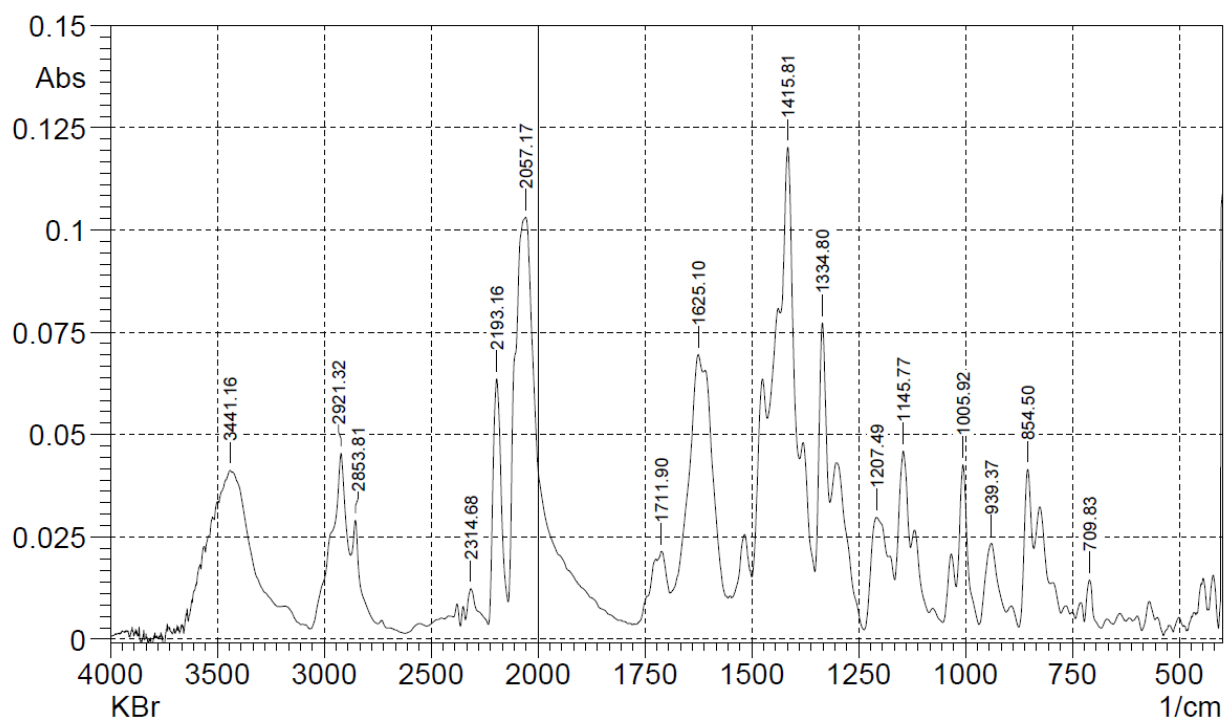

**Figure S43.** The FTIR spectra of **16**.

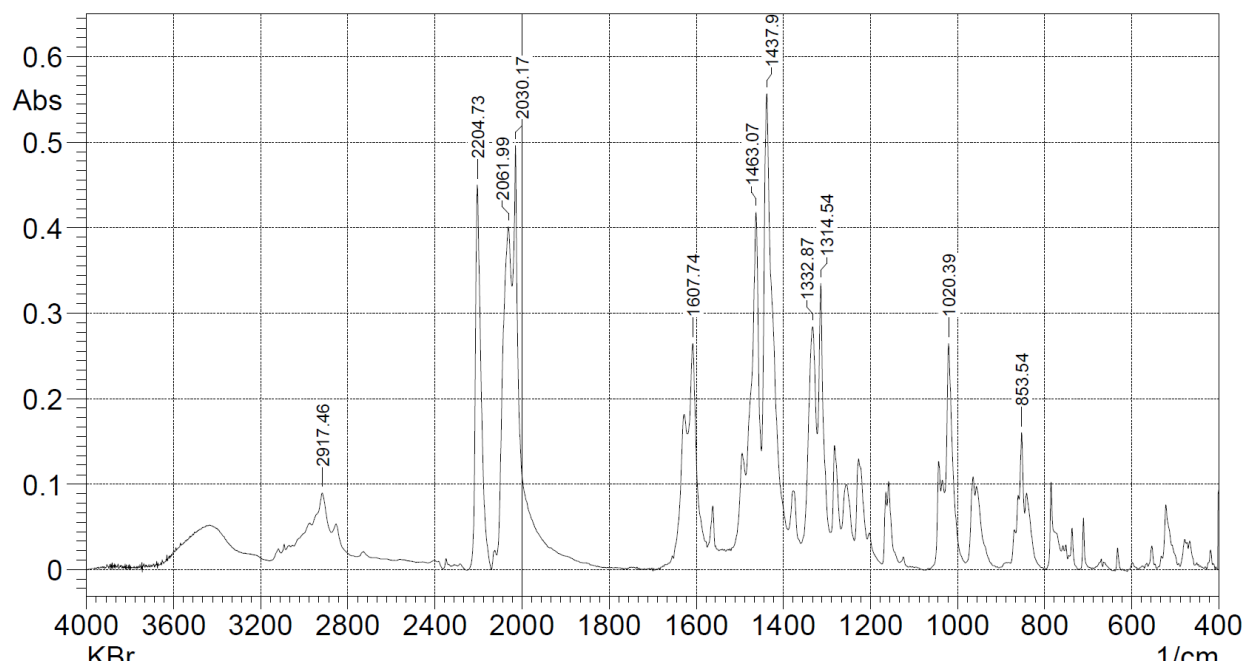

**Figure S44.** The FTIR spectra of **17**.

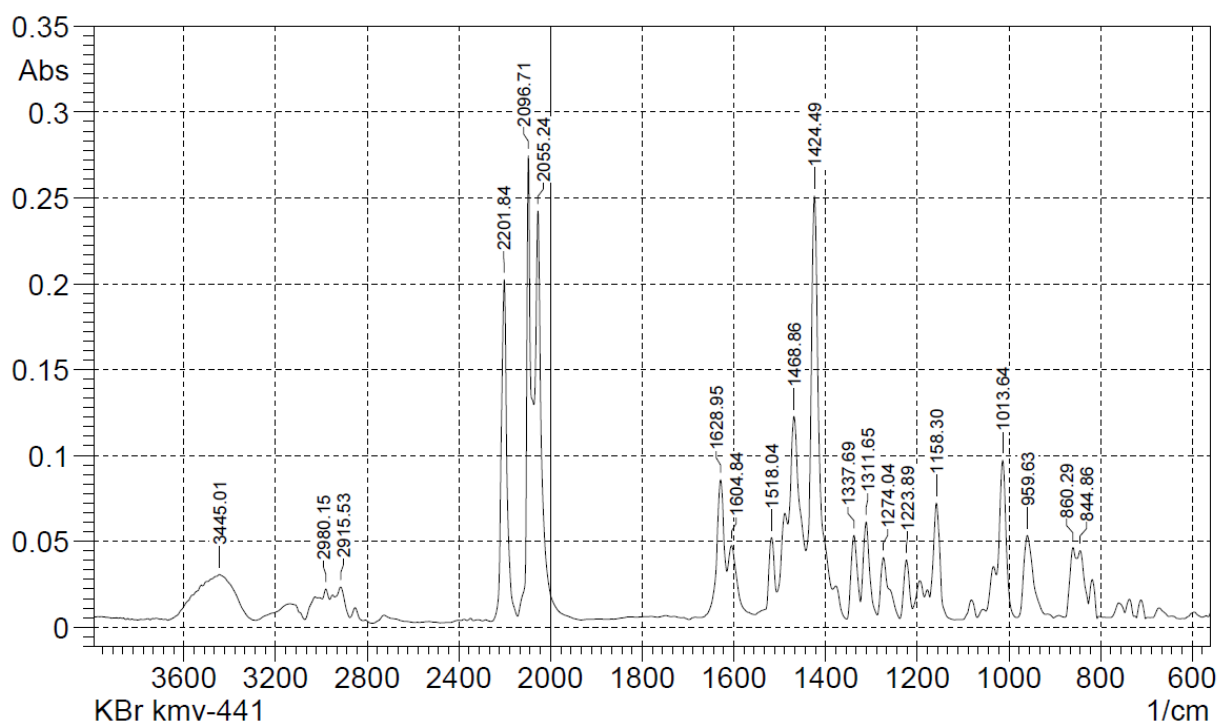

**Figure S45.** The FTIR spectra of **18**.

## S9 References

1. (a) A. S. Novikov and M. L. Kuznetsov, Theoretical study of Re(IV) and Ru(II) bis-isocyanide complexes and their reactivity in cycloaddition reactions with nitrones, *Inorganica Chim. Acta*, 2012, **380**, 78; (b) A. A. Melekhova, A. S. Novikov, T. L. Panikorovskii, N. A. Bokach and V. Y. Kukushkin, A novel family of homoleptic copper(i) complexes featuring disubstituted cyanamides: a combined synthetic, structural, and theoretical study, *New J. Chem.*, 2017, **41**, 14557.
2. E. D. Glendening, C. R. Landis and F. Weinhold, Natural bond orbital methods, *Wiley Interdiscip. Rev. Comput. Mol. Sci.*, 2012, **2**, 1.
3. I. Mayer and P. Salvador, Overlap populations, bond orders and valences for ‘fuzzy’ atoms, *Chem. Phys. Lett.*, 2004, **383**, 368.
4. A. E. Reed, L. A. Curtiss and F. Weinhold, Intermolecular interactions from a natural bond orbital, donor-acceptor viewpoint, *Chem. Rev.*, 1988, **88**, 899.
5. S. Dapprich and G. Frenking, Investigation of Donor-Acceptor Interactions: A Charge Decomposition Analysis Using Fragment Molecular Orbitals, *J. Phys. Chem.*, 1995, **99**, 9352.
6. S. I. Gorelsky, S. Ghosh and E. I. Solomon, Mechanism of N<sub>2</sub>O Reduction by the  $\mu$ -4-S Tetranuclear CuZ Cluster of Nitrous Oxide Reductase, *J. Am. Chem. Soc.*, 2006, **128**, 278.
7. F. H. Allen, O. Kennard, D. G. Watson, L. Brammer, A. G. Orpen and R. Taylor, Tables of bond lengths determined by X-ray and neutron diffraction. Part 1. Bond lengths in organic compounds, *J. Chem. Soc., Perkin Trans. 2*, 1987, **0**, S1.
8. (a) K. Ha, (2,2'-Bipyrimidine- $\kappa^2$ N<sup>1</sup>,N<sup>1'</sup>)bis(thiocyanato- $\kappa$ N)platinum(II), *Acta Crystallogr. E*, 2012, **68**, m676; (b) S. Paziresh, R. Babadi Aghakhanpour, S. Fuertes, V. Sicilia, F. Niroomand Hosseini and S. M. Nabavizadeh, A double rollover cycloplatinated(ii) skeleton: a versatile platform for tuning emission by chelating and non-chelating ancillary ligand systems, *Dalton Trans.*, 2019, **48**, 5713; (c) K. Ha, Crystal structure of (1,10-phenanthroline- $\kappa^2$ N,N')bis(thiocyanato- $\kappa$ N)platinum(II), C<sub>14</sub>H<sub>8</sub>N<sub>4</sub>PtS<sub>2</sub>, *Z. Kristallogr. NCS*, 2016, **231**, 329; (d) A. J. Paviglianiti, D. J. Minn, W. C. Fultz and J. L. Burmeister, The conjunctive response to steric hindrance in dithiocyanato[bis(diphenylphosphino)alkyl or aryl]palladium(II) complexes: a new look at a classic series, *Inorganica Chim. Acta*, 1989, **159**, 65; (e) A. D. Yeung, P. S. Ng and H. V. Huynh, Co-ligand effects in the catalytic activity of Pd(II)–NHC complexes, *J. Org. Chem.*, 2011, **696**, 112.
